# Supplementary material for: COVID-19 pandemic interim Foundation Year 1 post and confidence in core skills and competencies: a longitudinal survey
Source: PubMed Central journal article supplement — BMJ Open. 2022 Nov 2;12(11):e059487. doi: 10.1136/bmjopen-2021-059487 (PMC9638744; doi:10.1136/bmjopen-2021-059487), 2022-11-02
Supplement: bmjopen-2021-059487.draft_revisions.pdf [file bmjopen-2021-059487.draft_revisions.pdf]

# BMJ Open

BMJ Open is committed to open peer review. As part of this commitment we make the peer review history of every article we publish publicly available.

When an article is published we post the peer reviewers' comments and the authors' responses online. We also post the versions of the paper that were used during peer review. These are the versions that the peer review comments apply to.

The versions of the paper that follow are the versions that were submitted during the peer review process. They are not the versions of record or the final published versions. They should not be cited or distributed as the published version of this manuscript.

BMJ Open is an open access journal and the full, final, typeset and author-corrected version of record of the manuscript is available on our site with no access controls, subscription charges or pay-per-view fees (<http://bmjopen.bmj.com>).

If you have any questions on BMJ Open's open peer review process please email [info.bmjopen@bmj.com](mailto:info.bmjopen@bmj.com)

# BMJ Open

## The COVID-19 pandemic interim foundation year 1 post and confidence in core skills and competencies: a longitudinal survey

|                               |                                                                                                                                                                                                                                                                                              |
|-------------------------------|----------------------------------------------------------------------------------------------------------------------------------------------------------------------------------------------------------------------------------------------------------------------------------------------|
| Journal:                      | <i>BMJ Open</i>                                                                                                                                                                                                                                                                              |
| Manuscript ID                 | bmjopen-2021-059487                                                                                                                                                                                                                                                                          |
| Article Type:                 | Original research                                                                                                                                                                                                                                                                            |
| Date Submitted by the Author: | 09-Jan-2022                                                                                                                                                                                                                                                                                  |
| Complete List of Authors:     | Gatti, Cristina; Brighton and Sussex University Hospitals NHS Trust; Royal Devon and Exeter NHS Foundation Trust<br>Parker-Conway, Kathryn; Brighton and Sussex University Hospitals NHS Trust; Charing Cross Hospital,<br>Okorie, Michael; University Hospitals Sussex NHS Foundation Trust |
| Keywords:                     | COVID-19, MEDICAL EDUCATION & TRAINING, EDUCATION & TRAINING (see Medical Education & Training)                                                                                                                                                                                              |
|                               |                                                                                                                                                                                                                                                                                              |

SCHOLARONE™  
Manuscripts

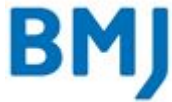

I, the Submitting Author has the right to grant and does grant on behalf of all authors of the Work (as defined in the below author licence), an exclusive licence and/or a non-exclusive licence for contributions from authors who are: i) UK Crown employees; ii) where BMJ has agreed a CC-BY licence shall apply, and/or iii) in accordance with the terms applicable for US Federal Government officers or employees acting as part of their official duties; on a worldwide, perpetual, irrevocable, royalty-free basis to BMJ Publishing Group Ltd ("BMJ") its licensees and where the relevant Journal is co-owned by BMJ to the co-owners of the Journal, to publish the Work in this journal and any other BMJ products and to exploit all rights, as set out in our [licence](#).

The Submitting Author accepts and understands that any supply made under these terms is made by BMJ to the Submitting Author unless you are acting as an employee on behalf of your employer or a postgraduate student of an affiliated institution which is paying any applicable article publishing charge ("APC") for Open Access articles. Where the Submitting Author wishes to make the Work available on an Open Access basis (and intends to pay the relevant APC), the terms of reuse of such Open Access shall be governed by a Creative Commons licence – details of these licences and which [Creative Commons](#) licence will apply to this Work are set out in our licence referred to above.

Other than as permitted in any relevant BMJ Author's Self Archiving Policies, I confirm this Work has not been accepted for publication elsewhere, is not being considered for publication elsewhere and does not duplicate material already published. I confirm all authors consent to publication of this Work and authorise the granting of this licence.

# The COVID-19 pandemic interim foundation year 1 post and confidence in core skills and competencies: a longitudinal survey

**Dr Cristina Gatti**

**MBBS BSc (Hons) MSc PGCert (MedEd)**

[cristina.gatti1@nhs.net](mailto:cristina.gatti1@nhs.net)

Royal Devon and Exeter NHS Foundation Trust, Barrack Road, Exeter, EX2 5DW

ORCID ID: [0000-0002-3620-0018](https://orcid.org/0000-0002-3620-0018)

**Dr Kathryn Parker-Conway**

**MBBS MRes (Corresponding Author)**

[kathryn.parker-conway@nhs.net](mailto:kathryn.parker-conway@nhs.net)

Charing Cross Hospital, Fulham Palace Road, W6 8RF

Correspondence to: [kathryn.parker-conway@nhs.net](mailto:kathryn.parker-conway@nhs.net)

ORCID ID: [0000-0002-6020-0149](https://orcid.org/0000-0002-6020-0149)

**Dr Michael Okorie**

**MBBS FRCP PhD**

[michael.okorie@nhs.net](mailto:michael.okorie@nhs.net)

University Hospitals Sussex NHS Foundation Trust, Eastern Road, Brighton, BN2 5BE

ORCID ID: [0000-0003-1960-8860](https://orcid.org/0000-0003-1960-8860)

# Abstract

## Objectives

To assess the impact of the interim foundation year 1 (FiY1) post on medical graduates' self-reported confidence in common tasks, core skills, competencies and procedures prior to starting FY1, as a measure of increasing preparedness for practice.

## Setting

A longitudinal survey was performed at a tertiary teaching hospital in the South East of England. FiY1 posts ran June-August 2020.

## Participants

Questionnaires were sent to 122 medical graduates from a single medical school and to 69 FiY1s at a single Teaching Hospital NHS Trust, irrespective of medical school attended.

## Primary outcome measures

Confidence levels in common FY1 tasks, core procedures and competencies were gathered before and after the FiY1 post through online questionnaires. Change in confidence comparing FiY1's and non-FiY1's was measured and analysed using linear regression.

## Results

Initial and follow-up questionnaires had 86 and 62 respondents respectively. Of these, 39 graduates were matched; 26 were FiY1s and 13 non-FiY1s. On a 5-point scale, the FiY1 post increased overall confidence in starting FY1 by 0.62 (95% CI 0.072-1.167,  $p=0.028$ ). The FiY1 post increased confidence in performing venepuncture by 0.32 (95% CI 0.011-0.920,  $p=0.045$ ), performing IV cannulation by 0.48 (95% CI 0.030-1.294,  $p=0.041$ ), and recognising, assessing and initiating the management of the acutely ill patient by 0.32 (95% CI 0.030-1.301,  $p=0.041$ ).

## Conclusions

The COVID-19 pandemic FiY1 post improves confidence in core skills and competencies. These findings may help guide future educational interventions in conjunction with further larger scale studies, ultimately aiding to bridge the transition gap between being a medical student and a doctor.

# Article summary

## Strengths and limitations of this study

- This study assessed the interim FY1 post's impact on graduates' self-reported confidence in common FY1 tasks, core skills, competencies and procedures, prior to starting FY1;
- The study benefited from prospective data collection longitudinally, involving questionnaires before and after the interim post;
- Due to the small sample size and this being a single-centre study, our findings are less transferable;
- The study relies on self-assessment of confidence which may present inaccuracies;
- Further research to determine the effectiveness of a similar post may inform future planning of undergraduate medical curricula.

## Introduction

Medical graduates find the transition to working as junior doctors extremely challenging. The uncertainty, increased responsibility and pressure often lead to feelings of inadequacy and anxiety amongst new doctors (1, 2). This issue is reflected in hospital inpatient mortality rates which rise by 6% on the first day new junior doctors start in August; so-called 'Black Wednesday'(3). Given these alarming figures, scrutiny has turned to improving medical students' transition to junior doctors, focusing on improving their preparedness for clinical practice (PfP) (4, 5). PfP has been defined as when students gain the knowledge, skills and behaviours expected of doctors to allow them to practise safely and gain patient trust (6). PfP improves patient safety and reduces the long-term risk of doctor burnout (7). Preparedness is helped when graduates' confidence in themselves improves but is often difficult to conceptualise (6). Although graduates tend to be well-prepared in history-taking, clinical examination and some practical procedures, they are less prepared in clinical reasoning, managing acutely unwell patients, prescribing, and complex communication scenarios such as breaking bad news. Moreover, they are less comfortable working within a multidisciplinary team (MDT) and lack familiarity with ward environments (8).

In a bid to ensure PfP amongst medical graduates, the General Medical Council (GMC) has outlined various educational interventions within medical school curricula including clinical placements, assistantships, shadowing and an induction (4, 7, 9, 10). Assistantships are clinical placements where students are expected to 'assist' junior doctors in their roles, partake in out-of-hours on-call work, perform practical skills, manage unwell patients, and prescribe under supervision (10). Assistantships have been positively received as an intervention in preparing students for practice. Most students feel more prepared and confident in managing

1  
2  
3 acute situations, gaining responsibility, on-call work, integrating into a team, administrative  
4 skills, and in therapeutics (11-15). This is consistent with the growing body of evidence which  
5 suggests that greater time spent in clinical practice encourages experiential learning and  
6 therefore better PfP (1). Illing *et al.*, expressed that 'opportunities for learning on the job,'  
7 and having 'a role that enables engagement in supervised clinical practice' are essential to  
8 improving PfP (16). Although assistantships are an established approach to PfP, there is no  
9 consensus on the assistantship's optimal length, setting or structure, and this lack of guidance  
10 may limit its impact (17). Assistantships vary widely between medical schools, and do not fulfil  
11 all of their aims (9). For example, Burford *et al.*, found over half of students had limited hands-  
12 on experience in acute care (18). In addition, the GMC 2019 National Training Survey found  
13 that 34% of medical graduates continue to feel unprepared for practice, an increase of 5% in  
14 the last 5 years (7). Thus, the optimal approach to preparing medical students for clinical  
15 practice requires ongoing review.

16  
17  
18  
19  
20  
21  
22 The COVID-19 pandemic caused significant disruption to UK medical school curricula but also  
23 provided a unique opportunity to introduce interim FY1 (FiY1) posts. These posts were  
24 intended for final year medical students to support the potential increased workforce  
25 demands during the pandemic (19). Graduates could opt-in to these supernumerary posts to  
26 work alongside ward teams. They were paid as per FY1 base salary, for up to two months  
27 between June-August 2020 (19). These posts increased exposure to the clinical environment  
28 and ward jobs generally. However, the impact of these posts on graduates' preparedness is  
29 unknown. This study aimed to assess the impact of the FiY1 post on medical graduates' self-  
30 reported confidence in common tasks, core skills, competencies and procedures prior to  
31 starting FY1, as a measure of increasing PfP.

## 32 33 34 35 36 37 38 39 40 41 42 43 44 45 46 47 48 49 50 51 52 53 54 55 56 57 58 59 60

This was a prospective longitudinal study of all medical graduates (class 2020) from Brighton and Sussex Medical School (BSMS) and those offered FiY1 posts at Brighton and Sussex University Hospitals - BSUH (now part of University Hospitals Sussex NHS Foundation Trust) from June-July 2020.

### 61 62 63 64 65 66 67 68 69 70 71 72 73 74 75 76 77 78 79 80 81 82 83 84 85 86 87 88 89 90 91 92 93 94 95 96 97 98 99 100

The study was exempted from a formal ethical review following completion of the self-appraisal questionnaire of the NHS Health Research Authority and discussion with the Research and Development (R&D) Department at BSUH.

### 101 102 103 104 105 106 107 108 109 110 111 112 113 114 115 116 117 118 119 120 121 122 123 124 125 126 127 128 129 130 131 132 133 134 135 136 137 138 139 140 141 142 143 144 145 146 147 148 149 150 151 152 153 154 155 156 157 158 159 160

Study participants were not involved in the design, conduct, reporting, or dissemination plans of our research.

## Data collection

An initial and a follow-up questionnaire (before and after the interim post respectively), were created on Google Forms and sent to medical graduates via e-mail and social media (Appendix 1 and Appendix 2). The medical graduates were from BSMS and/or those offered FiY1 posts at BSUH. This was incentivised with a £40 voucher prize draw. The questionnaires were formulated by CG, KPC, and MO, and piloted amongst nine doctors who were undertaking the PGCert in Medical Education. This identified a systematic error and minor usability issues, which were corrected. All participants gave informed consent before proceeding with the study questionnaires.

The online questionnaire was created to measure medical graduates' overall self-reported confidence in starting FY1, in common FY1 tasks, core procedures and competencies. Confidence was selected as the outcome measure to reduce ambiguity associated with the term 'prepared'. Each outcome had a five-point confidence scale. The core procedures and competencies are as outlined by the Horus ePortfolio (Tables 1-2). These are set by the UK Foundation Programme in conjunction with the GMC, and need to be achieved by all FY1 trainees to progress to FY2. Common FY1 tasks are jobs FY1s are frequently expected to complete, formulated by foundation doctors CG and KPC, and agreed by consultant MO who is experienced in medical education research (Table 3). Data were collected on: demographics, medical school attended, and the NHS Trust and specialty of both the interim and upcoming FY1 posts. A brief evaluation of the FiY1 post was included in the follow-up questionnaire (Appendix 2), which included open and closed questions to assess the advantages and disadvantages of the post, as well as its structure.

*Table 1. The UK Foundation Programme Curriculum's outline of the FY1 core skills and competencies and procedures*

| <b>Clinical care: Core skills and competencies</b>                                                       |
|----------------------------------------------------------------------------------------------------------|
| 1. Recognises, assesses and initiates management of the acutely ill patient                              |
| 2. Recognises, assesses and manages patients with long term conditions                                   |
| 3. Obtains history, performs clinical examination, formulates differential diagnosis and management plan |
| 4. Requests relevant investigations and acts upon results                                                |
| 5. Prescribes safely                                                                                     |
| 6. Performs procedures safely                                                                            |
| 7. Is trained and manages cardiac and respiratory arrest                                                 |
| 8. Demonstrates understanding of the principles of health promotion and illness prevention               |
| 9. Manages palliative and end of life care                                                               |

*Table 2. The UK Foundation Programme Curriculum's outline of the FY1 core procedures*



| Core Procedures                                                                                                                                                                                                                                                                                                                                                                                                                                                                                                                                                                                                                                                                                                                                                                                                                       |
|---------------------------------------------------------------------------------------------------------------------------------------------------------------------------------------------------------------------------------------------------------------------------------------------------------------------------------------------------------------------------------------------------------------------------------------------------------------------------------------------------------------------------------------------------------------------------------------------------------------------------------------------------------------------------------------------------------------------------------------------------------------------------------------------------------------------------------------|
| <ol style="list-style-type: none"> <li>1. Venepuncture</li> <li>2. IV cannulation</li> <li>3. Prepare and administer IV medications and injections</li> <li>4. Arterial puncture in an adult</li> <li>5. Blood culture from peripheral sites</li> <li>6. Intravenous infusion including the prescription of fluids</li> <li>7. Intravenous infusion of blood and blood products</li> <li>8. Injection of local anaesthetic to skin</li> <li>9. Injection – subcutaneous (e.g. insulin or LMW heparin)</li> <li>10. Injection – intramuscular</li> <li>11. Perform and interpret an ECG</li> <li>12. Perform and interpret peak flow</li> <li>13. Urethral catheterisation (male)</li> <li>14. Urethral catheterisation (female)</li> <li>15. Airway care including simple adjuncts (e.g. Guedel airway or laryngeal masks)</li> </ol> |

Table 3. Common FY1 tasks included in initial and follow-up questionnaires

| Common FY1 tasks                                                                                                                                                                                                                                                                                                                                                                                                                                      |
|-------------------------------------------------------------------------------------------------------------------------------------------------------------------------------------------------------------------------------------------------------------------------------------------------------------------------------------------------------------------------------------------------------------------------------------------------------|
| <p>Please rate your confidence on a scale of 1-5. 1 = Not confident, 2 = Slightly confident, 3 = Somewhat confident, 4 = Moderately confident, 5 = Very confident</p>                                                                                                                                                                                                                                                                                 |
| <ol style="list-style-type: none"> <li>1. In using IT systems at Brighton and Sussex University Hospitals, e.g. Medway, Bamboo/Panda, ICE, PACS</li> <li>2. In writing discharge summaries (TTOs)</li> <li>3. In making referrals (such as to other specialties, or for investigations)</li> <li>4. In requesting imaging (including CT scans which require discussion with radiologists)</li> <li>5. In speaking to relatives of patients</li> </ol> |

## Data analysis

Data were analysed using IBM SPSS Statistics 25.0. The curriculum outcomes most relevant to the FY1 role were selected for analysis, along with all the common FY1 tasks. For each outcome, the changes in confidence between the two questionnaires were calculated per individual. Linear regression was performed to analyse the impact of the FY1 post on change in confidence, adjusting for age, gender and university attended (BSMS or other).

Descriptive statistics were completed for closed questions evaluating the FiY1 post. The open questions describing advantages, disadvantages and improvements were analysed by CG and KPC using an inductive approach to identify the most common themes.

## Results

### Descriptive data

The online questionnaires were sent to 122 BSMS medical graduates (89 completed the FiY1 post, 33 did not), in addition to 69 FiY1s at the BSUH Trust, which included graduates from both BSMS and other UK universities. It was not possible to identify overlap in the two groups due to incomplete demographic information. The initial questionnaire was open 5<sup>th</sup>-12<sup>th</sup> June 2020 (8 days) and had 86 respondents. The follow-up questionnaire was open 20<sup>th</sup>-30<sup>th</sup> July 2020 (11 days) with 62 respondents. Of these, 39 graduates could be matched using recorded e-mail addresses (Figure 1).

The matched cohort consisted of 26 FiY1s, and 13 non-FiY1s. One participant was excluded as they did not work in a clinical post (Table 4). Over two thirds (71.1%) of graduates were from white backgrounds, other graduates identified as black (7.9%), mixed (10.5%) or Asian (10.5%).

Table 4. Descriptive data of participants in the matched cohort

|                               | Matched Cohort (n = 38) |      |
|-------------------------------|-------------------------|------|
|                               | No.                     | %    |
| <b>Gender</b>                 |                         |      |
| Female                        | 22                      | 57.9 |
| Male                          | 16                      | 42.1 |
| <b>Age (years)</b>            |                         |      |
| 18-24                         | 25                      | 65.8 |
| 25 and over                   | 13                      | 34.2 |
| <b>Ethnicity</b>              |                         |      |
| Asian / Black / Mixed / Other | 11                      | 28.9 |
| White                         | 27                      | 71.1 |
| <b>Medical School</b>         |                         |      |
| BSMS                          | 21                      | 55.3 |
| Other                         | 17                      | 44.7 |
| <b>FiY1 Hospital Trust</b>    |                         |      |
| BSUH                          | 19                      | 76.0 |
| Other                         | 6                       | 24.0 |
| <b>FiY1 Specialty</b>         |                         |      |
| Medicine                      | 23                      | 92.0 |
| Other                         | 2                       | 8.0  |

## Overall evaluation of the FiY1 post

The FiY1 post ranged from 5-9 weeks (average 7.7 weeks). Over a quarter of graduates (28%) said they would not do the FiY1 post unpaid, half (48%) would 'maybe' consider it. Nearly all graduates (23/25 = 92%) recommended the FiY1 post for the next year. Advantages of the FiY1 were described as gaining practical hands-on clinical experience within the role of an FY1 and managing acutely unwell patients, familiarisation with the ward environment, and being supernumerary, which was frequently linked with being well supported. Disadvantages raised were lack of clarity of FiY1 responsibilities (5/25 =20%), less rest before starting FY1 (6/25 =24%), and a minority (3/25 = 12%) felt unsupported. Suggested improvements included having a better induction, more on call experience and having a clearer role.

## Impact of FiY1 post on confidence

Linear regression modelling indicated that the FiY1 post increased overall confidence in starting FY1 by 0.62 (95% CI 0.072-1.167,  $p=0.028$ ). In addition, the FiY1 post increased confidence in performing venepuncture by 0.32 (95% CI 0.011-0.920,  $p=0.045$ ), performing IV cannulation by 0.48 (95% CI 0.030-1.294,  $p=0.041$ ), and recognising, assessing and initiating the management of the acutely ill patient by 0.32 (95% CI 0.030-1.301,  $p=0.041$ ). There was weak evidence to suggest that the FiY1 post improved confidence in using IT systems at BSUH by 0.92 (95% CI -0.052-1.621,  $p=0.065$ ) and in requesting relevant investigations and acting upon results by 0.48 (95% CI -0.057 to +1.288,  $p=0.072$ ) (Table 5).

This study found no evidence to suggest the FiY1 post increased confidence in writing discharge summaries, making referrals, speaking to patients' relatives, performing an arterial blood gas, prescribing blood products, history-taking, performing clinical examination, formulating differential diagnoses and management plans, or in managing palliative and end of life care patients (Table 5). However, an overall positive trend was noted in all these outcomes. Furthermore, there was no evidence to suggest the FiY1 post increased confidence in requesting imaging investigations, in safe prescribing, and in being trained in managing cardiac and respiratory arrest. When adjusting for age, gender, and university, a positive trend was not observed, with beta coefficients of approximately 0. There was generally no effect seen for the variables adjusted for, except in the outcome of being 'trained and managing cardiac and respiratory arrest,' in which females were less confident than males by 0.80 (95% CI -1.374- -0.218,  $p=0.008$ ).

Table 5. Change in confidence per outcome for matched cohort (n=38)

| Outcome                                                            | Mean change in confidence FiY1s (n = 25) | Mean change in confidence non-FiY1s (n = 13) | Difference in mean change in confidence (unadjusted) | Beta coefficient | 95% CI                 | P value |
|--------------------------------------------------------------------|------------------------------------------|----------------------------------------------|------------------------------------------------------|------------------|------------------------|---------|
| <i>Confidence in starting FY1</i>                                  | +0.48                                    | -0.23                                        | +0.71                                                | +0.620           | 0.072<br>to<br>+1.167  | 0.028   |
| <i>In using IT systems at BSUH</i>                                 | +0.92                                    | -0.08                                        | +1.00                                                | +0.785           | -0.052<br>to<br>+1.621 | 0.065   |
| <i>In writing discharge summaries (TTOs)</i>                       | +0.96                                    | +0.38                                        | +0.58                                                | +0.524           | -0.237<br>to<br>+1.286 | 0.171   |
| <i>In making referrals</i>                                         | +1.16                                    | +0.46                                        | +0.70                                                | +0.596           | -0.154<br>to<br>+1.347 | 0.116   |
| <i>In requesting imaging</i>                                       | +0.80                                    | +0.69                                        | +0.11                                                | -0.011           | -0.849<br>to<br>+0.827 | 0.979   |
| <i>In speaking to relatives of patients</i>                        | +0.64                                    | +0.15                                        | +0.49                                                | +0.439           | -0.325<br>to<br>+1.204 | 0.251   |
| <i>Performing venepuncture</i>                                     | +0.36                                    | -0.08                                        | +0.44                                                | +0.466           | +0.011<br>to<br>+0.920 | 0.045   |
| <i>Performing IV cannulation</i>                                   | +0.48                                    | -0.15                                        | +0.63                                                | +0.662           | +0.030<br>to<br>+1.294 | 0.041   |
| <i>Performing an arterial puncture (an ABG)</i>                    | +0.48                                    | -0.08                                        | +0.56                                                | +0.598           | -0.273<br>to<br>+1.469 | 0.172   |
| <i>Administering intravenous infusions and fluid prescriptions</i> | +0.20                                    | +0.08                                        | +0.12                                                | +0.106           | -0.619<br>to<br>+0.832 | 0.768   |
| <i>Prescribing blood and blood products</i>                        | +0.52                                    | +0.23                                        | +0.29                                                | +0.243           | -0.343<br>to<br>0.828  | 0.405   |
| <i>Urethral catheterisation</i>                                    | 0.00                                     | -0.31                                        | +0.31                                                | +0.224           | -0.443<br>to           | 0.500   |

|                                                                                                              |       |       |       |        |                        |       |
|--------------------------------------------------------------------------------------------------------------|-------|-------|-------|--------|------------------------|-------|
| <i>(male)</i>                                                                                                |       |       |       |        | +0.891                 |       |
| <i>Recognises, assesses and initiates management of the acutely ill patient</i>                              | +0.32 | -0.38 | +0.70 | +0.666 | +0.030<br>to<br>+1.301 | 0.041 |
| <i>Obtains history, performs clinical examination, formulates differential diagnosis and management plan</i> | +0.32 | +0.08 | +0.24 | +0.155 | -0.412<br>to<br>+0.723 | 0.582 |
| <i>Requests relevant investigations and acts upon results</i>                                                | +0.48 | -0.08 | +0.56 | +0.615 | -0.057<br>to<br>+1.288 | 0.072 |
| <i>Prescribes safely</i>                                                                                     | +0.20 | +0.15 | +0.05 | -0.029 | -0.460<br>to<br>+0.402 | 0.891 |
| <i>Is trained and manages cardiac and respiratory arrest</i>                                                 | +0.24 | +0.31 | -0.07 | -0.105 | -0.726<br>to<br>0.515  | 0.732 |
| <i>Manages palliative and end of life care</i>                                                               | +0.60 | -0.08 | +0.68 | +0.562 | -0.132<br>to<br>+1.255 | 0.109 |

## Discussion

This prospective longitudinal cohort study assessed whether the FiY1 post was able to impact graduates' PfP in terms of self-reported confidence in common FY1 tasks, core skills, competencies and procedures, prior to starting FY1. To our knowledge, this is the first study of its kind.

### Improved Confidence in Core skills, Competencies and FY1 tasks

Graduates who completed the FiY1 post showed a statistically significant increase in overall confidence in starting FY1 compared to non-FiY1s. They also had an increased confidence in performing FY1 core skills (venepuncture, IV cannulation), in competencies including

1  
2  
3 management of acutely ill patients and requesting investigations, and in common FY1 tasks,  
4 including use of IT systems. Interestingly, this improved confidence occurred within a brief  
5 and relatively unplanned intervention (average post length was 7.7 weeks).  
6  
7

8 This increased confidence is likely to be related to the FiY1 post allowing for increased clinical  
9 exposure, as clinical experience improves competence and reduces the stress of transition  
10 from student to doctor (2, 20). This relationship has previously been documented following  
11 assistantships and shadowing periods, where hands-on experience increased student's  
12 understanding of FY1 duties, including how to request investigations, write in notes,  
13 prescribe, and use IT systems (11-13, 18, 21, 22). This study showed the FiY1's additional  
14 benefit of improving confidence in managing acutely unwell patients, a competency which  
15 showed little or no improvement following assistantships/shadowing periods (18). The FiY1  
16 post also provided an opportunity for familiarisation with the clinical environment, which  
17 likely contributed to improved confidence in using IT systems, particularly for the 50% of  
18 FiY1's who continued to work in the same NHS Trust as their FiY1 post. At the time of writing,  
19 there is a dearth of articles published on the FiY1 post. However, a GMC commissioned study  
20 report reviewing the FiY1 post concluded that amongst its benefits it eased transition to  
21 starting FY1 and it increased preparedness to practice, with this finding being sustained 2  
22 months later (23). Three reflective articles have also noted the positive benefit of FiY1 roles  
23 in providing opportunities to put theory into practice, increase clinical experience, and  
24 improve confidence, though there was no formal measurement of change in confidence  
25 outlined (24-26).  
26  
27  
28  
29  
30  
31  
32  
33

34 Though the remaining common FY1 tasks, core skills and competencies did not show a  
35 statistically significant increase in self-reported confidence, most showed an overall positive  
36 trend. Given the relatively small sample size, a significant increase may be observed in these  
37 outcomes in a larger powered study, as noted in the GMC report (23). However, it may also  
38 indicate that graduates were already confident in some aptitudes prior to commencing FiY1,  
39 particularly in history-taking and performing clinical examinations (8). Another explanation  
40 may be that graduates did not gain significant experience in these areas during FiY1. For  
41 example, in formulating differential diagnoses and management plans, as ward rounds are  
42 often led by senior doctors. The opportunity for managing cardiac arrest is limited for all  
43 foundation doctors, which likely reflects the lack of exposure within the FiY1 post. It is  
44 disappointing that there was no observed increase in confidence in prescribing. However, an  
45 initial lack of clarity as to whether FiY1s were allowed to prescribe might have confounded  
46 results.  
47  
48  
49  
50  
51  
52  
53

54 A further advantage of the FiY1 post over previous interventions is the ability to experience  
55 the role of an FY1 as a doctor rather than a student, and developing an increased sense of  
56 responsibility. The increased responsibility noted when starting as a doctor is particularly  
57 daunting (2). As such emulating this increased obligation whilst still being supervised is helpful  
58 to reduce the shock of transition to FY1 (1). Assistantships have previously been documented  
59  
60

1  
2  
3 as creating an increased sense of responsibility, but how students experience assistantships  
4 is varied and dependent on student engagement, meaning not all students benefit from these  
5 outcomes equally (14, 17, 18). The standardised nature of the FiY1 may minimise the disparity  
6 in student experiences. Moreover, during the FiY1 posts, graduates were expected to work as  
7 doctors to support the workforce during the pandemic, and were being paid as such for this  
8 role. Consequently, they may have felt duty-bound to take on more responsibility compared  
9 to during assistantships, and likewise staff may have had greater expectations of them to step  
10 up as doctors (27). FiY1s wanted to be remunerated for this increased responsibility, with 28%  
11 of graduates advising they would not do the FiY1 post unpaid, and 48% who would only  
12 'maybe' consider it. As per the GMC report on the FiY1 post, the 'paid role of the FiY1 post  
13 adds something beyond undergraduate placements and assistantships' (23).  
14  
15  
16  
17  
18

19  
20 Though the FiY1 post may have been demanding on graduates, the majority felt well  
21 supported, and some associated this with having been supernumerary. A supportive  
22 environment is essential in negotiating this challenging transition and its associated stress,  
23 particularly as new doctors can be reluctant to seek help (2, 28). The supportive environment  
24 may be why Durand-Hill *et al.*, found that the FiY1 post led to graduates feeling less stressed  
25 and depressed (29). Another approach to creating a supportive environment was used in  
26 Northern Ireland – termed the 'compassionate leadership model,' where students were  
27 provided with a 'buddy system' and encouraged to highlight their educational needs for the  
28 FiY1 post. This approach helped students feel valued and supported (30).  
29  
30  
31  
32

### 33 **Disadvantages of FiY1**

34  
35 Only two graduates (8%) who completed the FiY1 post did not recommend it next year,  
36 correlating with the minority who felt unsupervised. Themes raised included lack of clarity of  
37 FiY1 responsibilities and their role. This is an issue that transcends previous educational  
38 interventions, as students want more guidance as to what is expected of them (22, 31). Cotton  
39 *et al.*, noted that benefits can be lost if roles are ill-defined (22).  
40  
41  
42

43  
44 Graduates were able to select an FiY1 post at either their university hospital, a hospital in  
45 their home region, or the hospital where they were due to start FY1. Therefore, only 52% of  
46 FiY1s worked in the same trust as their future FY1 role, and only 36% worked in the same  
47 specialty. Analysis to compare the outcomes of graduates that did or did not have an 'aligned'  
48 placement was not possible due to sample size. However, there is evidence that suggests that  
49 benefits are reduced if the placement is not relevant to them or relates less closely to where  
50 they'll start work (14, 22). Instead, alignment with a student's first FY1 post enhances their  
51 experience, though this benefit is not sustained to the second FY1 post (14, 15, 32).  
52  
53  
54

### 55 **Study limitations**

56  
57  
58 Due to the small sample size and this being a single-centre study, our findings are less  
59 transferable and reproducible. A majority of the FiY1s worked at BSUH, and all the non-FiY1s  
60

1  
2  
3 were BSMS graduates, so the experiences of the interim FY1 may be different elsewhere in  
4 the UK. BSMS benefits from an integrated curriculum design with early clinical exposure, so  
5 graduates from more traditional courses may find additional benefit to an FiY1 post.  
6 Conversely, medical schools with well-established assistantship programmes may find their  
7 graduates have less to gain. The majority of participants had interim posts in medical  
8 specialties, so benefits of posts particularly in psychiatry or surgery are unknown.  
9  
10  
11

12 The outcomes of this study relied on self-reported confidence. Though there was a significant  
13 increase in self-reported confidence, it is unclear how this confidence impacts on junior  
14 doctor outcomes and on patient care. This is something that has been highlighted previously  
15 with regards to assistantships; there is no peer-reviewed data available evaluating the impact  
16 of assistantships on outcomes including efficiency, patient safety, prescribing errors, stress  
17 and sickness (17). In addition, there was no external assessment of participants' change in  
18 confidence which subjects the findings to bias. Self-assessments are not always aligned with  
19 reality. Tallentire *et al.*, found that participants had misplaced confidence when it came to  
20 practical procedures with supervisors rating graduates' ability lower than graduates did  
21 themselves (33). Conversely, it is possible that graduates may have improved their skills in an  
22 outcome but still remained unconfident.  
23  
24  
25  
26  
27  
28

29 The loss of participants to follow-up presented another limitation. We tried to minimise this  
30 limitation by extending the response period of the questionnaire and providing a recall  
31 incentive. Despite the small numbers of matched participants, we were able to gain  
32 statistically significant results. However, with larger participant numbers, we could have  
33 continued to follow-up participants to measure change in confidence after starting FY1.  
34  
35  
36

### 37 **Future of FiY1 roles**

38  
39

40 Despite the limitations of this study, the initial findings are promising. Further studies  
41 assessing the role of the FiY1 as a trial intervention in multiple centres across the UK may  
42 provide more robust evidence of the FiY1's future role in undergraduate medical curricula. A  
43 study protocol for the 'COVIDReady2' survey has outlined its aim to fulfil the above by  
44 exploring nationwide experiences of medical students who underwent the FiY1 compared to  
45 those who did not, with a view to offering practical advice as to how these roles may be  
46 incorporated into future medical education (34). Assessing the impact of the FiY1 post on  
47 long-term outcomes including patient safety, prescribing errors, efficiency at work, and levels  
48 of stress and sickness would also determine the objective impact of this study. In addition,  
49 rates of mortality following junior doctors starting should be calculated since the initiation of  
50 educational interventions such as the assistantship and potentially future FiY1 posts, given  
51 the last study was in 2009 (3).  
52  
53  
54  
55  
56  
57

58 Recommendations for future trials of FiY1 posts are as follows:  
59  
60



- A financial incentive should be maintained to help encourage engagement and an environment where increased responsibility is expected and supervised.
- A supernumerary position should be preserved to ensure good supervision is maintained.
- A unified and clear outline of roles and responsibilities should be created, including provision of supervised prescribing, so as to assist improved confidence in this domain.

## Conclusion

In summary, the FiY1 post has inadvertently created an opportunity to improve clinical exposure for medical graduates. This study showed that the FiY1 post improves overall confidence prior to starting FiY1 and in specific core skills and competencies required by the GMC. The post is similar to an assistantship in its aims to improve student's preparedness and ease the transition to work life. However, there are key differences in that the FiY1 post is paid, graduates are expected to work as doctors and not students, and its standardised nature means all graduates should gain a more unified experience. Moreover, the FiY1 has resulted in greater hands-on experience, and improved confidence in managing acutely unwell patients.

The FiY1 post has the potential to provide new-found structure and streamline final year placements across medical schools. It could standardise educational opportunities nationwide, and ease the unsettling transition from student to doctor in a way that medical curricula have not facilitated before. This could revolutionise curriculum design.

## Footnotes

**Contributors and guarantor information:** CG and KPC contributed equally to this paper; they have joint first authorship. All authors substantially contributed to the planning, drafting and reviewing of the work described in the article, each approving the final version. CG and KPC oversaw the production of the manuscript in equal contribution and are guarantors for the overall content. The corresponding author attests that all listed authors meet authorship criteria and that no others meeting the criteria have been omitted.

**Copyright/license for publication:** The Corresponding Author has the right to grant on behalf of all authors and does grant on behalf of all authors, a worldwide licence to the Publishers and its licensees in perpetuity, in all forms, formats and media (whether known now or created in the future), to i) publish, reproduce, distribute, display and store the Contribution, ii) translate the Contribution into other languages, create adaptations, reprints, include within collections and create summaries, extracts and/or, abstracts of the Contribution, iii) create any other derivative work(s) based on the Contribution, iv) to exploit all subsidiary rights in

1  
2  
3 the Contribution, v) the inclusion of electronic links from the Contribution to third party  
4 material where-ever it may be located; and, vi) licence any third party to do any or all of the  
5 above.  
6  
7

8  
9 **Competing interests declaration:** All authors have completed the ICMJE uniform disclosure  
10 form at [www.icmje.org/coi\\_disclosure.pdf](http://www.icmje.org/coi_disclosure.pdf) and declare: no support from any organisation for  
11 the submitted work; no financial relationships with any organisations that might have an  
12 interest in the submitted work in the previous three years; no other relationships or activities  
13 that could appear to have influenced the submitted work.  
14  
15

16  
17 **Transparency declaration:** The lead author affirms that the manuscript is an honest, accurate,  
18 and transparent account of the study being reported; that no important aspects of the study  
19 have been omitted; and that any discrepancies from the study as originally planned have been  
20 explained. No funding was required for this study. Relevant anonymised participant level data  
21 is available on reasonable request.  
22  
23

24  
25 **Funding:** The authors have not declared a specific grant for this research from any funding  
26 agency in the public, commercial or not-for-profit sectors.  
27  
28

29  
30 **Data sharing:** All authors agree to share data included in this work as required.  
31  
32

## 33 34 35 36 37 38 39 40 41 42 43 44 45 46 47 48 49 50 51 52 53 54 55 56 57 58 59 60

1. Coakley N, O'Leary P, Bennett D. 'Waiting in the wings'; Lived experience at the threshold of clinical practice. *Med Educ.* 2019;53(7):698-709.
2. Brennan N, Corrigan O, Allard J, Archer J, Barnes R, Bleakley A, et al. The transition from medical student to junior doctor: today's experiences of Tomorrow's Doctors. *Med Educ.* 2010;44(5):449-58.
3. Jen MH, Bottle A, Majeed A, Bell D, Aylin P. Early in-hospital mortality following trainee doctors' first day at work. *PLoS One.* 2009;4(9):e7103.
4. Gaskell N, Hinton R, Page T, Elvins T, Malin A. Putting an end to Black Wednesday: Improving patient safety by achieving comprehensive trust induction and mandatory training by day 1. *J Clin Med.* 2016;16(2):124-8.
5. Teagle AR, Gainsborough N, Haq I, Okorie M, George M. Preparing medical students for clinical practice: easing the transition. *Perspectives on Med Ed.* 2017;6(4):277-80.
6. Monrouxe LV, Bullock A, Gormley G, Kaufhold K, Kelly N, Roberts CE, et al. New graduate doctors' preparedness for practice: A multistakeholder, multicentre narrative study. *BMJ Open.* 2018;8(8).
7. General Medical Council [Internet]. The state of medical education and practice in the UK c 2019 [cited 2021 Feb 13]. Available from: [https://www.gmc-uk.org/-/media/documents/somep-2019---full-report\\_pdf-81131156.pdf](https://www.gmc-uk.org/-/media/documents/somep-2019---full-report_pdf-81131156.pdf)

- 1
  - 2
  - 3
  - 4
  - 5
  - 6
  - 7
  - 8
  - 9
  - 10
  - 11
  - 12
  - 13
  - 14
  - 15
  - 16
  - 17
  - 18
  - 19
  - 20
  - 21
  - 22
  - 23
  - 24
  - 25
  - 26
  - 27
  - 28
  - 29
  - 30
  - 31
  - 32
  - 33
  - 34
  - 35
  - 36
  - 37
  - 38
  - 39
  - 40
  - 41
  - 42
  - 43
  - 44
  - 45
  - 46
  - 47
  - 48
  - 49
  - 50
  - 51
  - 52
  - 53
  - 54
  - 55
  - 56
  - 57
  - 58
  - 59
  - 60
8. Monrouxe LV, Grundy L, Mann M, John Z, Panagoulas E, Bullock A, et al. How prepared are UK medical graduates for practice? A rapid review of the literature 2009-2014. *BMJ Open*. 2017;7(1).
9. General Medical Council [Internet]. Clinical placements for medical students: Advice supplementary to Tomorrow's Doctors (2009) c2011. [cited 2021 Mar 29]. Available from: [https://www.gmc-uk.org/-/media/documents/clinical-placements-for-medical-students---guidance-0815\\_pdf-56437824.pdf](https://www.gmc-uk.org/-/media/documents/clinical-placements-for-medical-students---guidance-0815_pdf-56437824.pdf)
10. General Medical Council [Internet]. Good Medical Practice c2019. [cited 2021 Mar 29]. Available from: <https://www.gmc-uk.org/ethical-guidance/ethical-guidance-for-doctors/good-medical-practice>
11. Braniff C, Spence RA, Stevenson M, Boohan M, Watson P. Assistantship improves medical students' perception of their preparedness for starting work. *Med Teach*. 2016;38(1):51-8.
12. Ryan PSJ, Gormley GJ, Hart ND. Preparation for practice: a novel role for general practice in pre-foundation assistantships. *Education for primary care: an official publication of the Association of Course Organisers, National Association of GP Tutors, World Organisation of Family Doctors*. 2017;28(4):210-5.
13. Morrison JJ, McGlynn M, Pringle J, Sandle M, Scott H, Cotton P. The university of Glasgow: "Preparation for Practice"-implementation and evaluation of a new student assistantship. *Med. Educ, Supplement*. 2010;44:18.
14. Fullbrook A, Ross M, Mellanby E, Wylde K, Jaap A, Cameron H. Initial experiences of a student assistantship. *Clin Teach*. 2015;12(5):310-4.
15. Jones OM, Okeke C, Bullock A, Wells SE, Monrouxe LV. 'He's going to be a doctor in August': A narrative interview study of medical students' and their educators' experiences of aligned and misaligned assistantships. *BMJ Open*. 2016;6(6).
16. Illing JC, Morrow GM, Rothwell nee Kergon CR, Burford BC, Baldauf BK, Davies CL, et al. Perceptions of UK medical graduates' preparedness for practice: a multi-centre qualitative study reflecting the importance of learning on the job. *BMC Med Educ*. 2013;13:34.
17. Crossley JG, Vivekananda-Schmidt P. Student assistantships: bridging the gap between student and doctor. *Adv Med Educ Pract*. 2015;6:447-57.
18. Burford B, Whittle V, Vance GH. The relationship between medical student learning opportunities and preparedness for practice: a questionnaire study. *BMC Med Educ*. 2014;14:223.
19. General Medical Council [Internet]. Joint statement: early provisional registration for final year medical students c2020 [cited 2021 Mar 26]. Available from: <https://www.gmc-uk.org/news/news-archive/early-provisional-registration-for-final-year-medical-students>
20. Draper CE, Louw GJ. Competence for internship: perceptions of final-year medical students. *Health Educ*. 2012;25(1):16-23.
21. Bindal T, Goodyear H. Newly qualified doctors' views of their job shadowing experiences. *Br J Hosp Med*. 2014;75(9):528-32.
22. Cotton P, Scott H, Morrison J, McGlynn M. Evaluation of preparation for practice block by foundation year 1 doctors: A qualitative study. *Med Educ, Supplement*. 2010;44:219.
23. General Medical Council [Internet]. 2020 Medical Graduates: The work and wellbeing of interim Foundation Year 1 doctors during COVID-19 c2021 [cited 2021 Aug 18].

Available from: <https://www.gmc-uk.org/about/what-we-do-and-why/data-and-research/research-and-insight-archive/2020-medical-graduates---the-work-and-wellbeing-of-interim-foundation-year-1-doctors-during-covid-19>

24. Jones I, Neal-Smith G. FiY1: A reflective account of the foundation interim year 1 post. *J Clin Med*. 2021;21(3):e269.
25. Youssef S, Zaidi S, Shrestha S, Varghese C, Rajagopalan S. First impressions of the foundation interim year 1 postings: positives, pitfalls, and perils. *Med Educ Online*. 2020;25(1):1785116.
26. Kaminskaite V. Covid-19: Looking back at the experiences of graduates and educators during the interim Foundation Year 1. *BMJ*. 2021;374:n1265.
27. Reid A-M, Ledger A, Kilminster S, Fuller R. Can the tools of activity theory help us in advancing understanding and organisational change in undergraduate medical education? *Adv Health Sci Edu*. 2015;20(3):655-68.
28. Sturman NA-O, Tan Z, Turner J. "A steep learning curve": junior doctor perspectives on the transition from medical student to the health-care workplace. *BMC Med Educ*. 2017;17(1):92.
29. Durand-Hill M, Ike DI, Nijhawan AN, Shah AB, Dawson A, Awad WI. 841 The psychological impact of Foundation Interim Year 1 Placements on Final Year UK Medical Students Transitioning to Foundation Year One During the COVID Era. *BJS*. 2021;108(Supplement\_2).
30. Dougan C, Philips S-A, Hughes D, Gardiner K. Compassionate leadership during COVID-19: an ABC approach to the introduction of new medical graduates as Foundation interim Year 1s (FiY1s). *BMJ Leader*. 2020:leader-2020-000323.
31. Prince KJ, Boshuizen Hp Fau - van der Vleuten CPM, van der Vleuten Cp Fau - Scherpbier AJJA, Scherpbier AJ. Students' opinions about their preparation for clinical practice. *Med Educ*. 2005;39(7):704-12.
32. Wells SE, Bullock A, Monrouxe LV. Newly qualified doctors' perceived effects of assistantship alignment with first post: A longitudinal questionnaire study. *BMJ Open*. 2019;9(3).
33. Tallentire VR, Smith SE, Wylde K, Cameron HS. Are medical graduates ready to face the challenges of Foundation training? *Postgrad Med J*. 2011;87(1031):590-5.
34. Byrne MHV, Ashcroft J, Alexander L, Wan JCM, Arora A, Brown MEL, et al. COVIDReady2 study protocol: cross-sectional survey of medical student volunteering and education during the COVID-19 pandemic in the United Kingdom. *BMC Med Educ*. 2021;21(1):211.

Figure 1. Participant flow diagram

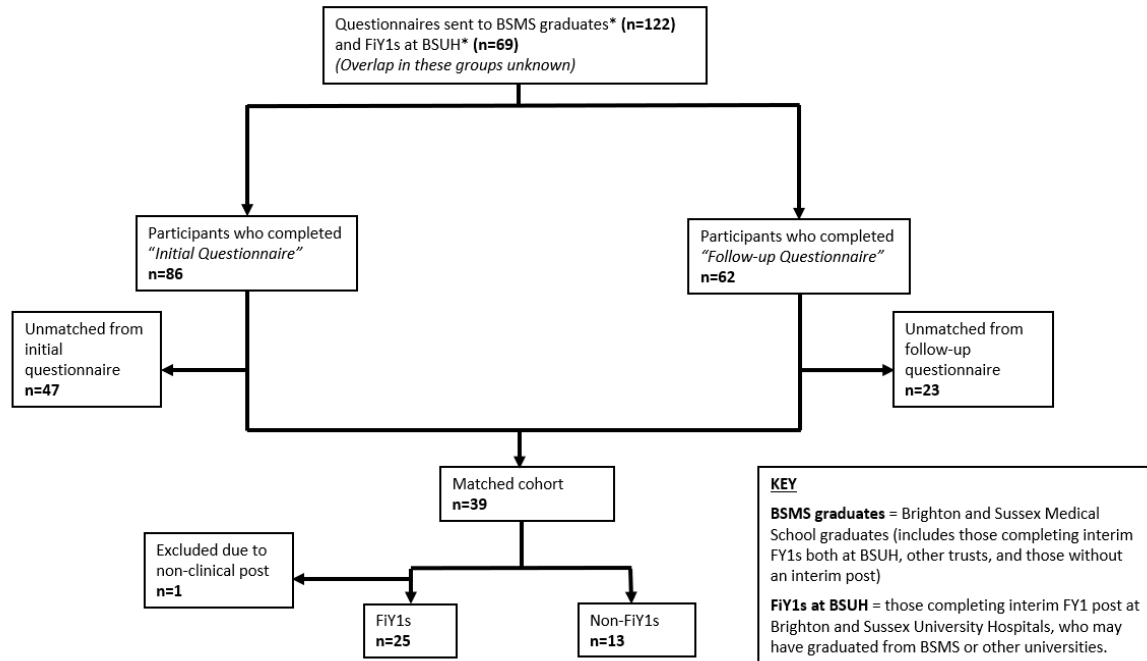

# Appendix 1: Initial Questionnaire Pre-Interim FY1 post

You are being invited to participate in a service improvement project, which aims to review the impact of the interim FY1 placement on confidence when starting FY1 in August. This is being carried out by Dr Cristina Gatti and Dr Katie Parker-Conway, Academic Foundation doctors at Brighton and Sussex University Hospitals.

This will involve completing a questionnaire assessing your confidence in core procedures, skills and knowledge of managing unwell patients, at the beginning and end of your interim placement, to assess if these answers have changed. The questionnaire is short and should take less than 5 minutes. You will be emailed the post-placement questionnaire at the end of your interim FY1 placement.

Your responses will remain anonymous; results may be presented to Brighton and Sussex Medical School (BSMS) to inform future service planning, published in journals and/or presented to medical education forums such as conferences.

If you have any questions, please contact us via email: [cristina.gatti1@nhs.net](mailto:cristina.gatti1@nhs.net) or [kathryn.parker-conway@nhs.net](mailto:kathryn.parker-conway@nhs.net).

Your participation is entirely voluntary. Thank you in advance for your time.

\* Required

1. What gender do you identify with? \*

*Mark only one oval.*

Female

Male

Transgender Female

Transgender Male

Gender variant/Non-conforming

Prefer not to say

Other: \_\_\_\_\_

1 2. What is your age? \*

2  
3 *Mark only one oval.*

4  
5  18-24 years old

6  
7  25-34 years old

8  
9  35-44 years old

10  
11  45 years and over

12  
13  Prefer not to say

14  
15  
16  
17  
18  
19 3. Please specify your ethnicity \*

20  
21 *Mark only one oval.*

22  
23  White (British, Irish, Any other white background)

24  
25  Black / African / Caribbean / Black British

26  
27  Mixed / Multiple ethnic groups

28  
29  Other ethnic group

30  
31  Prefer not to say

32  
33  
34  
35  
36  
37 4. Which medical school did you attend? \*

38  
39  
40  
41 \_\_\_\_\_

42  
43  
44 5. Which NHS Trust and specialty are you working in currently? \*

45  
46  
47  
48 \_\_\_\_\_

49  
50  
51 6. Which NHS Trust and specialty will you be working in from August 2020? \*

52  
53  
54  
55 \_\_\_\_\_

7. I feel confident about starting FY1 in August 2020. \*

Mark only one oval.

Strongly disagree

Disagree

Neutral

Agree

Strongly agree

Common  
FY1 Tasks

The following section will review your confidence in completing common tasks usually required of an FY1. Please rate your confidence on a scale of 1-5.

1 = Not confident, 2 = Slightly confident, 3= Somewhat confident, 4 = Moderately confident, 5 = Very confident

8. 1. In using IT systems at Brighton and Sussex University Hospitals, e.g. Medway, Bamboo/Panda, ICE, PACS \*

Mark only one oval.

1      2      3      4      5

9. 2. In writing discharge summaries (TTOs) \*

Mark only one oval.

1      2      3      4      5



10. 3. In making referrals (such as to other specialties, or for investigations) \*

Mark only one oval.

1      2      3      4      5

\_\_\_\_\_

          

\_\_\_\_\_

11. 4. In requesting imaging (including CT scans which require discussion with radiologists) \*

Mark only one oval.

1      2      3      4      5

\_\_\_\_\_

          

\_\_\_\_\_

12. 5. In speaking to relatives of patients \*

Mark only one oval.

1      2      3      4      5

\_\_\_\_\_

          

\_\_\_\_\_

**FY1 Core  
Procedures**

The following section will review your confidence in performing the practical skills required to complete FY1 competencies currently. Please rate your confidence on a scale of 1-5.

1 = Not confident, 2 = Slightly confident, 3= Somewhat confident, 4 = Moderately confident, 5 = Very confident

13. 1. Performing venepuncture \*

1 = Not confident, 2 = Slightly confident, 3= Somewhat confident, 4 = Moderately confident, 5 = Very confident

Mark only one oval.

1      2      3      4      5

---

          

---

14. 2. Performing IV cannulation \*

1 = Not confident, 2 = Slightly confident, 3= Somewhat confident, 4 = Moderately confident, 5 = Very confident

Mark only one oval.

1      2      3      4      5

---

          

---

15. 3. Preparing and administering IV medications and injections \*

1 = Not confident, 2 = Slightly confident, 3= Somewhat confident, 4 = Moderately confident, 5 = Very confident

Mark only one oval.

1      2      3      4      5

---

          

---

1  
2  
3  
4  
5  
6  
7  
8  
9  
10  
11  
12  
13  
14  
15  
16  
17  
18  
19  
20  
21  
22  
23  
24  
25  
26  
27  
28  
29  
30  
31  
32  
33  
34  
35  
36  
37  
38  
39  
40  
41  
42  
43  
44  
45  
46  
47  
48  
49  
50  
51  
52  
53  
54  
55  
56  
57  
58  
59  
60

16. 4. Performing an arterial puncture in an adult (an ABG) \*

1 = Not confident, 2 = Slightly confident, 3= Somewhat confident, 4 = Moderately confident, 5 = Very confident

Mark only one oval.

|                       |                       |                       |                       |                       |
|-----------------------|-----------------------|-----------------------|-----------------------|-----------------------|
| 1                     | 2                     | 3                     | 4                     | 5                     |
| <input type="radio"/> |

17. 5. Taking blood cultures from peripheral sites \*

1 = Not confident, 2 = Slightly confident, 3= Somewhat confident, 4 = Moderately confident, 5 = Very confident

Mark only one oval.

|                       |                       |                       |                       |                       |
|-----------------------|-----------------------|-----------------------|-----------------------|-----------------------|
| 1                     | 2                     | 3                     | 4                     | 5                     |
| <input type="radio"/> |

18. 6. Administering an intravenous infusion including the prescription of fluids \*

1 = Not confident, 2 = Slightly confident, 3= Somewhat confident, 4 = Moderately confident, 5 = Very confident

Mark only one oval.

|                       |                       |                       |                       |                       |
|-----------------------|-----------------------|-----------------------|-----------------------|-----------------------|
| 1                     | 2                     | 3                     | 4                     | 5                     |
| <input type="radio"/> |

## 19. 7. Prescribing an intravenous infusion of blood and blood products \*

1 = Not confident, 2 = Slightly confident, 3= Somewhat confident, 4 = Moderately confident, 5 = Very confident

Mark only one oval.

1 2 3 4 5

---

    

---

## 20. 8. Administering an injection of local anaesthetic to skin \*

1 = Not confident, 2 = Slightly confident, 3= Somewhat confident, 4 = Moderately confident, 5 = Very confident

Mark only one oval.

1 2 3 4 5

---

    

---

## 21. 9. Administering a subcutaneous injection e.g. Insulin or LMW Heparin \*

1 = Not confident, 2 = Slightly confident, 3= Somewhat confident, 4 = Moderately confident, 5 = Very confident

Mark only one oval.

1 2 3 4 5

---

    

---

22. 10. Administering an intramuscular injection \*

1 = Not confident, 2 = Slightly confident, 3= Somewhat confident, 4 = Moderately confident, 5 = Very confident

Mark only one oval.

|                       |                       |                       |                       |                       |
|-----------------------|-----------------------|-----------------------|-----------------------|-----------------------|
| 1                     | 2                     | 3                     | 4                     | 5                     |
| <input type="radio"/> |

23. 11. Performing and interpreting an ECG \*

1 = Not confident, 2 = Slightly confident, 3= Somewhat confident, 4 = Moderately confident, 5 = Very confident

Mark only one oval.

|                       |                       |                       |                       |                       |
|-----------------------|-----------------------|-----------------------|-----------------------|-----------------------|
| 1                     | 2                     | 3                     | 4                     | 5                     |
| <input type="radio"/> |

24. 12. Performing and interpreting peak flow \*

1 = Not confident, 2 = Slightly confident, 3= Somewhat confident, 4 = Moderately confident, 5 = Very confident

Mark only one oval.

|                       |                       |                       |                       |                       |
|-----------------------|-----------------------|-----------------------|-----------------------|-----------------------|
| 1                     | 2                     | 3                     | 4                     | 5                     |
| <input type="radio"/> |

## 25. 13. Urethral catheterisation (male)

1 = Not confident, 2 = Slightly confident, 3= Somewhat confident, 4 = Moderately confident, 5 = Very confident

Mark only one oval.

1      2      3      4      5

---

          

---

## 26. 14. Urethral catheterisation (female) \*

1 = Not confident, 2 = Slightly confident, 3= Somewhat confident, 4 = Moderately confident, 5 = Very confident

Mark only one oval.

1      2      3      4      5

---

          

---

## 27. 15. Performing airway care including using simple adjuncts (e.g. Guedal airway or laryngeal masks) \*

1 = Not confident, 2 = Slightly confident, 3= Somewhat confident, 4 = Moderately confident, 5 = Very confident

Mark only one oval.

1      2      3      4      5

---

          

---

FY1 Core  
Competencies

The final section will review your confidence in managing unwell patients as per your requirements to meet the clinical care competencies in the F1 curriculum. Please rate your confidence currently on a scale of 1-5.

1 = Not confident, 2 = Slightly confident, 3= Somewhat confident, 4 = Moderately confident, 5 = Very confident

28. 1. Recognises, assesses and initiates management of the acutely ill patient \*

1 = Not confident, 2 = Slightly confident, 3= Somewhat confident, 4 = Moderately confident, 5 = Very confident

Mark only one oval.

1 2 3 4 5

---

---

29. 2. Recognises, assesses and manages patients with long term conditions \*

1 = Not confident, 2 = Slightly confident, 3= Somewhat confident, 4 = Moderately confident, 5 = Very confident

Mark only one oval.

1 2 3 4 5

---

---

30. 3. Obtains history, performs clinical examination, formulates differential diagnosis and management plan \*

1 = Not confident, 2 = Slightly confident, 3= Somewhat confident, 4 = Moderately confident, 5 = Very confident

Mark only one oval.

1 2 3 4 5

---

---

31. 4. Requests relevant investigations and acts upon results \*

1 = Not confident, 2 = Slightly confident, 3= Somewhat confident, 4 = Moderately confident, 5 = Very confident

Mark only one oval.

|                       |                       |                       |                       |                       |
|-----------------------|-----------------------|-----------------------|-----------------------|-----------------------|
| 1                     | 2                     | 3                     | 4                     | 5                     |
| <input type="radio"/> |

32. 5. Prescribes safely \*

1 = Not confident, 2 = Slightly confident, 3= Somewhat confident, 4 = Moderately confident, 5 = Very confident

Mark only one oval.

|                       |                       |                       |                       |                       |
|-----------------------|-----------------------|-----------------------|-----------------------|-----------------------|
| 1                     | 2                     | 3                     | 4                     | 5                     |
| <input type="radio"/> |

33. 6. Performs procedures safely \*

1 = Not confident, 2 = Slightly confident, 3= Somewhat confident, 4 = Moderately confident, 5 = Very confident

Mark only one oval.

|                       |                       |                       |                       |                       |
|-----------------------|-----------------------|-----------------------|-----------------------|-----------------------|
| 1                     | 2                     | 3                     | 4                     | 5                     |
| <input type="radio"/> |



34. 7. Is trained and manages cardiac and respiratory arrest \*

1 = Not confident, 2 = Slightly confident, 3= Somewhat confident, 4 = Moderately confident, 5 = Very confident

Mark only one oval.

|                       |                       |                       |                       |                       |
|-----------------------|-----------------------|-----------------------|-----------------------|-----------------------|
| 1                     | 2                     | 3                     | 4                     | 5                     |
| <input type="radio"/> |

35. 8. Demonstrates understanding of the principles of health promotion and illness prevention \*

1 = Not confident, 2 = Slightly confident, 3= Somewhat confident, 4 = Moderately confident, 5 = Very confident

Mark only one oval.

|                       |                       |                       |                       |                       |
|-----------------------|-----------------------|-----------------------|-----------------------|-----------------------|
| 1                     | 2                     | 3                     | 4                     | 5                     |
| <input type="radio"/> |

36. 9. Manages palliative and end of life care \*

1 = Not confident, 2 = Slightly confident, 3= Somewhat confident, 4 = Moderately confident, 5 = Very confident

Mark only one oval.

|                       |                       |                       |                       |                       |
|-----------------------|-----------------------|-----------------------|-----------------------|-----------------------|
| 1                     | 2                     | 3                     | 4                     | 5                     |
| <input type="radio"/> |

To Finish

1 37. Any other comments/concerns or areas of improvement you would like to  
2 suggest...

3  
4  
5  
6 \_\_\_\_\_  
7 \_\_\_\_\_  
8 \_\_\_\_\_  
9 \_\_\_\_\_  
10 \_\_\_\_\_  
11 \_\_\_\_\_  
12 \_\_\_\_\_  
13 \_\_\_\_\_

14  
15  
16 38. Please enter your email address if you are happy to be sent the follow up  
17 questionnaire (please ensure this is an email you will have access to in 2 months  
18 time).  
19  
20

21 \_\_\_\_\_  
22  
23  
24  
25

26 **Thank you very much for your time.**

27  
28 By clicking 'submit' you are consenting to participating in this improvement project, as described previously. For  
29 any more information, please email [cristina.gatti1@nhs.net](mailto:cristina.gatti1@nhs.net) or [kathryn.parker-conway@nhs.net](mailto:kathryn.parker-conway@nhs.net).  
30

31  
32  
33  
34  
35  
36 This content is neither created nor endorsed by Google.

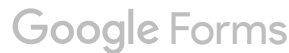

# Appendix 2: Follow-up Questionnaire

## Post-Interim FY1 post

THIS QUESTIONNAIRE IS FOR THOSE STARTING FY1 IN AUGUST 2020, WHO HAVE OR HAVE NOT COMPLETED AN INTERIM FY1 POST.

You are being invited to participate in a service improvement project, which aims to review the impact of the interim FY1 placement on confidence when starting FY1 in August. This is being carried out by Dr Cristina Gatti and Dr Katie Parker-Conway, Academic Foundation doctors at Brighton and Sussex University Hospitals.

This will involve completing a questionnaire assessing your confidence in core procedures, skills and knowledge of managing unwell patients, before starting FY1 in August. If you completed an interim post, it will also include an evaluation of this post. The questionnaire is short and should take less than 5 minutes.

Your responses will remain anonymous; results may be presented to Brighton and Sussex Medical School (BSMS) to inform future service planning, published in journals and/or presented to medical education forums.

If you have any questions, please contact us via email: [cristina.gatti1@nhs.net](mailto:cristina.gatti1@nhs.net) or [kathryn.parker-conway@nhs.net](mailto:kathryn.parker-conway@nhs.net).

Your participation is entirely voluntary.

All those completing the questionnaire will be entered into a prize draw to win a £40 amazon voucher.

Thank you in advance for your time.

\* Required

1 1. What gender do you identify with? \*

2  
3 *Mark only one oval.*

4  
5  Female

6  
7  Male

8  
9  Transgender Female

10  
11  Transgender Male

12  
13  Gender variant/Non-conforming

14  
15  Prefer not to say

16  
17  Other: \_\_\_\_\_

18  
19  
20  
21  
22 2. What is your age? \*

23  
24 *Mark only one oval.*

25  
26  18-24 years old

27  
28  25-34 years old

29  
30  35-44 years old

31  
32  45 years and over

33  
34  Prefer not to say

35  
36  
37  
38  
39  
40 3. Please specify your ethnicity \*

41  
42 *Mark only one oval.*

43  
44  White (British, Irish, Any other white background)

45  
46  Asian / Asian British

47  
48  Black / African / Caribbean / Black British

49  
50  Mixed / Multiple ethnic groups

51  
52  Other ethnic group

53  
54  Prefer not to say

## 4. Which medical school did you attend? \*

Mark only one oval.

- University of Aberdeen
- Anglia Ruskin University
- Aston University
- Barts and The London School of Medicine and Dentistry
- University of Birmingham
- Brighton and Sussex Medical School
- University of Bristol
- University of Buckingham
- University of Cambridge
- Cardiff University
- University of Dundee
- Edge Hill University
- University of Exeter
- University of Glasgow
- Hull York Medical School
- Imperial College London
- Keele University
- Kent and Medway Medical School
- King's College London
- Lancaster University
- University of Leeds
- University of Leicester
- University of Liverpool
- London School of Hygiene and Tropical Medicine
- University of Manchester
- Newcastle University
- Norwich Medical School (University of East Anglia)
- University of Nottingham
- University of Nottingham - Lincoln Medical School

For peer review only - <http://bmjopen.bmj.com/site/about/guidelines.xhtml>

- 1  University of Oxford
- 2  Plymouth University
- 3
- 4  Queen's University Belfast
- 5
- 6  University of Sheffield
- 7
- 8  University of Southampton
- 9
- 10  University of St Andrews
- 11  St George's, University of London
- 12
- 13  University of Sunderland
- 14
- 15  Swansea University
- 16
- 17  University of Central Lancashire
- 18
- 19  University College London
- 20
- 21  University of Warwick
- 22
- 23  Other
- 24
- 25
- 26
- 27

28 5. Which NHS Trust will you be working in from August 2020? \*

29

30

31 \_\_\_\_\_

32

33

34

35 6. Which specialty will you be working in from August 2020? \*

36

37

38 \_\_\_\_\_

39

40

41

42 7. I feel confident about starting FY1 in August 2020. \*

43

44

45 *Mark only one oval.*

46

- 47  Strongly disagree
- 48  Disagree
- 49
- 50  Neutral
- 51
- 52  Agree
- 53
- 54  Strongly agree
- 55
- 56
- 57
- 58
- 59
- 60

Common  
FY1 Tasks

The following section will review your confidence in completing common tasks usually required of an FY1. Please rate your confidence on a scale of 1-5.

1 = Not confident, 2 = Slightly confident, 3= Somewhat confident, 4 = Moderately confident, 5 = Very confident

8. 1. In using IT systems at Brighton and Sussex University Hospitals, e.g. Medway, Bamboo/Panda, ICE, PACS \*

1 = Not confident, 2 = Slightly confident, 3= Somewhat confident, 4 = Moderately confident, 5 = Very confident

Mark only one oval.

|                       |                       |                       |                       |                       |
|-----------------------|-----------------------|-----------------------|-----------------------|-----------------------|
| 1                     | 2                     | 3                     | 4                     | 5                     |
| <input type="radio"/> |

9. 2. In writing discharge summaries (TTOs) \*

1 = Not confident, 2 = Slightly confident, 3= Somewhat confident, 4 = Moderately confident, 5 = Very confident

Mark only one oval.

|                       |                       |                       |                       |                       |
|-----------------------|-----------------------|-----------------------|-----------------------|-----------------------|
| 1                     | 2                     | 3                     | 4                     | 5                     |
| <input type="radio"/> |

10. 3. In making referrals (such as to other specialties, or for investigations) \*

1 = Not confident, 2 = Slightly confident, 3= Somewhat confident, 4 = Moderately confident, 5 = Very confident

Mark only one oval.

|                       |                       |                       |                       |                       |
|-----------------------|-----------------------|-----------------------|-----------------------|-----------------------|
| 1                     | 2                     | 3                     | 4                     | 5                     |
| <input type="radio"/> |

11. Please explain your answer to question 3. \*

1  
2  
3  
4  
5  
6  
7  
8  
9  
10  
11  
12

---



---



---



---

12. 4. In requesting imaging (including CT scans which require discussion with radiologists) \*

1 = Not confident, 2 = Slightly confident, 3= Somewhat confident, 4 = Moderately confident, 5 = Very confident

Mark only one oval.

1      2      3      4      5

---

          

---

13. 5. In speaking to relatives of patients \*

1 = Not confident, 2 = Slightly confident, 3= Somewhat confident, 4 = Moderately confident, 5 = Very confident

Mark only one oval.

1      2      3      4      5

---

          

---

**FY1 Core Procedures**

The following section will review your confidence in performing the practical skills required to complete FY1 competencies. Please rate your confidence on a scale of 1-5.

1 = Not confident, 2 = Slightly confident, 3= Somewhat confident, 4 = Moderately confident, 5 = Very confident



14. 1. Performing venepuncture \*

1 = Not confident, 2 = Slightly confident, 3= Somewhat confident, 4 = Moderately confident, 5 = Very confident

Mark only one oval.

|                       |                       |                       |                       |                       |
|-----------------------|-----------------------|-----------------------|-----------------------|-----------------------|
| 1                     | 2                     | 3                     | 4                     | 5                     |
| <input type="radio"/> |

15. 2. Performing IV cannulation \*

1 = Not confident, 2 = Slightly confident, 3= Somewhat confident, 4 = Moderately confident, 5 = Very confident

Mark only one oval.

|                       |                       |                       |                       |                       |
|-----------------------|-----------------------|-----------------------|-----------------------|-----------------------|
| 1                     | 2                     | 3                     | 4                     | 5                     |
| <input type="radio"/> |

16. 3. Preparing and administering IV medications and injections \*

1 = Not confident, 2 = Slightly confident, 3= Somewhat confident, 4 = Moderately confident, 5 = Very confident

Mark only one oval.

|                       |                       |                       |                       |                       |
|-----------------------|-----------------------|-----------------------|-----------------------|-----------------------|
| 1                     | 2                     | 3                     | 4                     | 5                     |
| <input type="radio"/> |

17. 4. Performing an arterial puncture in an adult (an ABG) \*

1 = Not confident, 2 = Slightly confident, 3= Somewhat confident, 4 = Moderately confident, 5 = Very confident

Mark only one oval.

|                       |                       |                       |                       |                       |
|-----------------------|-----------------------|-----------------------|-----------------------|-----------------------|
| 1                     | 2                     | 3                     | 4                     | 5                     |
| <input type="radio"/> |

18. 5. Taking blood cultures from peripheral sites \*

1 = Not confident, 2 = Slightly confident, 3= Somewhat confident, 4 = Moderately confident, 5 = Very confident

Mark only one oval.

|                       |                       |                       |                       |                       |
|-----------------------|-----------------------|-----------------------|-----------------------|-----------------------|
| 1                     | 2                     | 3                     | 4                     | 5                     |
| <input type="radio"/> |

19. 6. Administering an intravenous infusion including the prescription of fluids \*

1 = Not confident, 2 = Slightly confident, 3= Somewhat confident, 4 = Moderately confident, 5 = Very confident

Mark only one oval.

|                       |                       |                       |                       |                       |
|-----------------------|-----------------------|-----------------------|-----------------------|-----------------------|
| 1                     | 2                     | 3                     | 4                     | 5                     |
| <input type="radio"/> |

20. 7. Prescribing an intravenous infusion of blood and blood products \*

1 = Not confident, 2 = Slightly confident, 3= Somewhat confident, 4 = Moderately confident, 5 = Very confident

Mark only one oval.

|                       |                       |                       |                       |                       |
|-----------------------|-----------------------|-----------------------|-----------------------|-----------------------|
| 1                     | 2                     | 3                     | 4                     | 5                     |
| <hr/>                 |                       |                       |                       |                       |
| <input type="radio"/> |
| <hr/>                 |                       |                       |                       |                       |

21. 8. Administering an injection of local anaesthetic to skin \*

1 = Not confident, 2 = Slightly confident, 3= Somewhat confident, 4 = Moderately confident, 5 = Very confident

Mark only one oval.

|                       |                       |                       |                       |                       |
|-----------------------|-----------------------|-----------------------|-----------------------|-----------------------|
| 1                     | 2                     | 3                     | 4                     | 5                     |
| <hr/>                 |                       |                       |                       |                       |
| <input type="radio"/> |
| <hr/>                 |                       |                       |                       |                       |

22. 9. Administering a subcutaneous injection e.g. Insulin or LMW Heparin \*

1 = Not confident, 2 = Slightly confident, 3= Somewhat confident, 4 = Moderately confident, 5 = Very confident

Mark only one oval.

|                       |                       |                       |                       |                       |
|-----------------------|-----------------------|-----------------------|-----------------------|-----------------------|
| 1                     | 2                     | 3                     | 4                     | 5                     |
| <hr/>                 |                       |                       |                       |                       |
| <input type="radio"/> |
| <hr/>                 |                       |                       |                       |                       |

## 23. 10. Administering an intramuscular injection \*

1 = Not confident, 2 = Slightly confident, 3= Somewhat confident, 4 = Moderately confident, 5 = Very confident

Mark only one oval.

1      2      3      4      5

---

          

---

## 24. 11. Performing and interpreting an ECG \*

1 = Not confident, 2 = Slightly confident, 3= Somewhat confident, 4 = Moderately confident, 5 = Very confident

Mark only one oval.

1      2      3      4      5

---

          

---

## 25. 12. Performing and interpreting peak flow \*

1 = Not confident, 2 = Slightly confident, 3= Somewhat confident, 4 = Moderately confident, 5 = Very confident

Mark only one oval.

1      2      3      4      5

---

          

---

26. 13. Urethral catheterisation (male) \*

1 = Not confident, 2 = Slightly confident, 3= Somewhat confident, 4 = Moderately confident, 5 = Very confident

Mark only one oval.

|                       |                       |                       |                       |                       |
|-----------------------|-----------------------|-----------------------|-----------------------|-----------------------|
| 1                     | 2                     | 3                     | 4                     | 5                     |
| <input type="radio"/> |

27. 14. Urethral catheterisation (female) \*

1 = Not confident, 2 = Slightly confident, 3= Somewhat confident, 4 = Moderately confident, 5 = Very confident

Mark only one oval.

|                       |                       |                       |                       |                       |
|-----------------------|-----------------------|-----------------------|-----------------------|-----------------------|
| 1                     | 2                     | 3                     | 4                     | 5                     |
| <input type="radio"/> |

28. 15. Performing airway care including using simple adjuncts (e.g. Guedal airway or laryngeal masks) \*

1 = Not confident, 2 = Slightly confident, 3= Somewhat confident, 4 = Moderately confident, 5 = Very confident

Mark only one oval.

|                       |                       |                       |                       |                       |
|-----------------------|-----------------------|-----------------------|-----------------------|-----------------------|
| 1                     | 2                     | 3                     | 4                     | 5                     |
| <input type="radio"/> |

FY1 Core Competencies

The final section will review your confidence in managing unwell patients as per your requirements to meet the clinical care competencies in the F1 curriculum. Please rate your confidence on a scale of 1-5.

1 = Not confident, 2 = Slightly confident, 3= Somewhat confident, 4 = Moderately confident, 5 = Very confident

29. 1. Recognises, assesses and initiates management of the acutely ill patient \*

1 = Not confident, 2 = Slightly confident, 3= Somewhat confident, 4 = Moderately confident, 5 = Very confident

Mark only one oval.

1 2 3 4 5

Five empty ovals for selection, each positioned below a number from 1 to 5.

30. 2. Recognises, assesses and manages patients with long term conditions \*

1 = Not confident, 2 = Slightly confident, 3= Somewhat confident, 4 = Moderately confident, 5 = Very confident

Mark only one oval.

1 2 3 4 5

Five empty ovals for selection, each positioned below a number from 1 to 5.

31. 3. Obtains history, performs clinical examination, formulates differential diagnosis and management plan \*

1 = Not confident, 2 = Slightly confident, 3= Somewhat confident, 4 = Moderately confident, 5 = Very confident

Mark only one oval.

1 2 3 4 5

Five empty ovals for selection, each positioned below a number from 1 to 5.

32. 4. Requests relevant investigations and acts upon results \*

1 = Not confident, 2 = Slightly confident, 3= Somewhat confident, 4 = Moderately confident, 5 = Very confident

Mark only one oval.

|                       |                       |                       |                       |                       |
|-----------------------|-----------------------|-----------------------|-----------------------|-----------------------|
| 1                     | 2                     | 3                     | 4                     | 5                     |
| <input type="radio"/> |

33. 5. Prescribes safely \*

1 = Not confident, 2 = Slightly confident, 3= Somewhat confident, 4 = Moderately confident, 5 = Very confident

Mark only one oval.

|                       |                       |                       |                       |                       |
|-----------------------|-----------------------|-----------------------|-----------------------|-----------------------|
| 1                     | 2                     | 3                     | 4                     | 5                     |
| <input type="radio"/> |

34. 6. Performs procedures safely \*

1 = Not confident, 2 = Slightly confident, 3= Somewhat confident, 4 = Moderately confident, 5 = Very confident

Mark only one oval.

|                       |                       |                       |                       |                       |
|-----------------------|-----------------------|-----------------------|-----------------------|-----------------------|
| 1                     | 2                     | 3                     | 4                     | 5                     |
| <input type="radio"/> |

35. 7. Is trained and manages cardiac and respiratory arrest \*

1 = Not confident, 2 = Slightly confident, 3= Somewhat confident, 4 = Moderately confident, 5 = Very confident

Mark only one oval.

|                       |                       |                       |                       |                       |
|-----------------------|-----------------------|-----------------------|-----------------------|-----------------------|
| 1                     | 2                     | 3                     | 4                     | 5                     |
| <input type="radio"/> |

36. 8. Demonstrates understanding of the principles of health promotion and illness prevention \*

1 = Not confident, 2 = Slightly confident, 3= Somewhat confident, 4 = Moderately confident, 5 = Very confident

Mark only one oval.

|                       |                       |                       |                       |                       |
|-----------------------|-----------------------|-----------------------|-----------------------|-----------------------|
| 1                     | 2                     | 3                     | 4                     | 5                     |
| <input type="radio"/> |

37. 9. Manages palliative and end of life care \*

1 = Not confident, 2 = Slightly confident, 3= Somewhat confident, 4 = Moderately confident, 5 = Very confident

Mark only one oval.

|                       |                       |                       |                       |                       |
|-----------------------|-----------------------|-----------------------|-----------------------|-----------------------|
| 1                     | 2                     | 3                     | 4                     | 5                     |
| <input type="radio"/> |

38. Did you have an Interim FY1 post? \*

Mark only one oval.

Yes      Skip to question 39

No      Skip to question 59



## Interim FY1 post

39. In which NHS Trust did you complete your Interim FY1 post? \*

---

40. In which specialty did you complete your Interim FY1 post? \*

---

41. How many weeks long was your interim FY1 post (to nearest week)? \*

*Mark only one oval.*

1

2

3

4

5

6

7

8

9

42. Did you have an assistantship placement during medical school? \*

A student assistantship is a placement usually in the final year of medical school in which a student is on the same ward and/or team acting as assistant to a junior doctor, with defined duties under appropriate supervision. They should be integrated into the team and participate in activities similar to those of a newly qualified doctor.

*Mark only one oval.*

Yes    *Skip to question 43*

Unsure    *Skip to question 45*

No    *Skip to question 45*

- 1 43. How did the assistantship compare to the Interim FY1 post, in terms of improving  
2 your skills, knowledge and confidence for starting FY1? \*

3  
4  
5 *Mark only one oval.*

- 6  
7  Interim post MORE beneficial than assistantship  
8  
9  Interim post EQUALLY beneficial to assistantship  
10  
11  Interim post LESS beneficial than assistantship  
12  
13  
14  
15

- 16 44. Please explain your answer.  
17  
18  
19  
20  
21

22 *Skip to question 45*  
23  
24

- 25 45. Did you do any on calls as part of your Interim FY1 post? Tick all that apply. \*  
26  
27

28 *Check all that apply.*

- 29  
30  Weekend day shifts  
31  Late shifts (all or part of the scheduled shift is after 5pm)  
32  Night shifts  
33  I didn't do any on call shifts  
34  
35  
36  
37  
38

- 39 46. Did you feel you were part of the multi-disciplinary team (MDT) during your Interim  
40 FY1 post? \*  
41

42 The multi-disciplinary team is a group of professionals from one or more clinical disciplines (e.g. nurses,  
43 physiotherapists, occupational therapists, dietitians, speech and language therapists etc.) who work  
44 together to make decisions regarding patient management.  
45

46  
47 *Mark only one oval.*

- 48  
49  Always  
50  
51  Mostly  
52  
53  Sometimes  
54  
55  Rarely  
56  
57  Never  
58  
59

1 47. Do you feel you were treated as a doctor during your Interim FY1 post (as opposed  
2 to a student)? \*

3  
4 *Mark only one oval.*

5  
6  
7  Always

8  
9  Mostly

10  
11  Sometimes

12  
13  Rarely

14  
15  Never

16  
17  
18  
19  
20 48. Did you feel that you knew what your role was within the team? \*

21  
22 *Mark only one oval.*

23  
24  
25  Always

26  
27  Mostly

28  
29  Sometimes

30  
31  Rarely

32  
33  Never

34  
35  
36  
37  
38 49. Did you feel as though you were appropriately supervised? \*

39  
40 *Mark only one oval.*

41  
42  
43  Always

44  
45  Mostly

46  
47  Sometimes

48  
49  Rarely

50  
51  Never

1 50. Did you feel you had clear learning outcomes for the Interim FY1 post? \*

2  
3 *Mark only one oval.*

4  
5  Yes

6  
7  Somewhat

8  
9  No

10  
11  
12  
13  
14  
15 51. Do you think your Interim F1 post has been broadly similar to that of your  
16 colleagues? \*

17  
18  
19 *Mark only one oval.*

20  
21  Yes

22  
23  Somewhat

24  
25  No

26  
27  
28  
29 *Skip to question 52*

30  
31  
32  
33 52. Do you feel that the Interim FY1 post has improved your competence? \*

34  
35 *Mark only one oval.*

36  
37  Yes

38  
39  Somewhat

40  
41  No

42  
43  
44  
45  
46  
47 53. Has the Interim FY1 post reduced your anxiety about starting FY1? \*

48  
49 *Mark only one oval.*

50  
51  Yes

52  
53  Somewhat

54  
55  No

1  
2  
3  
4  
5  
6  
7  
8  
9  
10  
11  
12  
13  
14  
15  
16  
17  
18  
19  
20  
21  
22  
23  
24  
25  
26  
27  
28  
29  
30  
31  
32  
33  
34  
35  
36  
37  
38  
39  
40  
41  
42  
43  
44  
45  
46  
47  
48  
49  
50  
51  
52  
53  
54  
55  
56  
57  
58  
59  
60

54. What was most useful about the Interim FY1 post? \*

---

---

---

---

---

55. Were there any disadvantages to having an Interim FY1 post? \*

---

---

---

---

---

56. Can you suggest anything to improve the Interim FY1 post? \*

---

---

---

---

---

57. Would you recommend the Interim FY1 post for next year? \*

*Mark only one oval.*

Yes  
 No

58. Would you have done this Interim FY1 post unpaid as part of the medical school curriculum? \*

Mark only one oval.

Yes

Maybe

No

Skip to question 61

59. Do you wish you had completed an Interim FY1 post? \*

Mark only one oval.

Yes

Somewhat

No

60. Please explain your answer. \*

\_\_\_\_\_

Skip to question 61

To Finish

61. Please include any further comments you would like to make.

\_\_\_\_\_  
\_\_\_\_\_  
\_\_\_\_\_  
\_\_\_\_\_  
\_\_\_\_\_

1 62. Please enter your email address if you would like to be included in the prize draw.  
2  
3  
4 \_\_\_\_\_  
5  
6

7  
8 63. Are you happy to be sent a further follow up questionnaire?  
9

10 Please ensure you will have access to the email address you entered above in 2 months time.  
11

12 *Mark only one oval.*  
13

14  Yes  
15

16  No  
17  
18  
19  
20

21 **Thank you very much for your time.**  
22

23 By clicking 'submit' you are consenting to participating in this improvement project, as described previously. For  
24 any more information, please email [cristina.gatti1@nhs.net](mailto:cristina.gatti1@nhs.net) or [kathryn.parker-conway@nhs.net](mailto:kathryn.parker-conway@nhs.net).  
25  
26  
27  
28 \_\_\_\_\_  
29

30  
31 This content is neither created nor endorsed by Google.  
32

33 **Google Forms**  
34  
35  
36  
37  
38  
39  
40  
41  
42  
43  
44  
45  
46  
47  
48  
49  
50  
51  
52  
53  
54  
55  
56  
57  
58  
59  
60

## Research checklist:

Checklist of standards for reporting quality improvement standards - Revised Standards for Quality Improvement Reporting Excellence (SQIURE 2.0)

| Reporting item(s)               | Page number(s) on which item(s) reported |
|---------------------------------|------------------------------------------|
| <b>Title and Abstract</b>       |                                          |
| 1. Title                        | 1                                        |
| 2. Abstract                     | 2                                        |
| <b>Introduction</b>             |                                          |
| 3. Problem Description          | 3-4                                      |
| 4. Available knowledge          | 3-4                                      |
| 5. Rationale                    | 3-4                                      |
| 6. Specific Aims                | 4                                        |
| <b>Methods</b>                  |                                          |
| 7. Context                      | 4                                        |
| 8. Intervention(s)              | 5-6                                      |
| 9. Study of the Intervention(s) | 5-6                                      |
| 10. Measures                    | 5-6                                      |
| 11. Analysis                    | 6-7                                      |
| 12. Ethical Considerations      | 4                                        |
| <b>Results</b>                  |                                          |
| 13. Results                     | 7-10                                     |
| <b>Discussion</b>               |                                          |
| 14. Summary                     | 10-11                                    |
| 15. Interpretation              | 11-12                                    |
| 16. Limitations                 | 13                                       |
| 17. Conclusions                 | 14                                       |
| <b>Other information</b>        |                                          |
| 18. Funding                     | 15                                       |



# BMJ Open

## The COVID-19 pandemic interim foundation year 1 post and confidence in core skills and competencies: a longitudinal survey

|                                 |                                                                                                                                                                                                                                                                                                                                                 |
|---------------------------------|-------------------------------------------------------------------------------------------------------------------------------------------------------------------------------------------------------------------------------------------------------------------------------------------------------------------------------------------------|
| Journal:                        | <i>BMJ Open</i>                                                                                                                                                                                                                                                                                                                                 |
| Manuscript ID                   | bmjopen-2021-059487.R1                                                                                                                                                                                                                                                                                                                          |
| Article Type:                   | Original research                                                                                                                                                                                                                                                                                                                               |
| Date Submitted by the Author:   | 01-Sep-2022                                                                                                                                                                                                                                                                                                                                     |
| Complete List of Authors:       | Gatti, Cristina; Brighton and Sussex University Hospitals NHS Trust; Royal Devon and Exeter NHS Foundation Trust<br>Parker-Conway, Kathryn; Brighton and Sussex University Hospitals NHS Trust; Imperial College Healthcare NHS Trust,<br>Okorie, Michael; Brighton and Sussex Medical School; University Hospitals Sussex NHS Foundation Trust |
| <b>Primary Subject Heading</b>: | Medical education and training                                                                                                                                                                                                                                                                                                                  |
| Secondary Subject Heading:      | Medical education and training                                                                                                                                                                                                                                                                                                                  |
| Keywords:                       | COVID-19, MEDICAL EDUCATION & TRAINING, EDUCATION & TRAINING (see Medical Education & Training)                                                                                                                                                                                                                                                 |
|                                 |                                                                                                                                                                                                                                                                                                                                                 |

SCHOLARONE™  
Manuscripts



I, the Submitting Author has the right to grant and does grant on behalf of all authors of the Work (as defined in the below author licence), an exclusive licence and/or a non-exclusive licence for contributions from authors who are: i) UK Crown employees; ii) where BMJ has agreed a CC-BY licence shall apply, and/or iii) in accordance with the terms applicable for US Federal Government officers or employees acting as part of their official duties; on a worldwide, perpetual, irrevocable, royalty-free basis to BMJ Publishing Group Ltd ("BMJ") its licensees and where the relevant Journal is co-owned by BMJ to the co-owners of the Journal, to publish the Work in this journal and any other BMJ products and to exploit all rights, as set out in our [licence](#).

The Submitting Author accepts and understands that any supply made under these terms is made by BMJ to the Submitting Author unless you are acting as an employee on behalf of your employer or a postgraduate student of an affiliated institution which is paying any applicable article publishing charge ("APC") for Open Access articles. Where the Submitting Author wishes to make the Work available on an Open Access basis (and intends to pay the relevant APC), the terms of reuse of such Open Access shall be governed by a Creative Commons licence – details of these licences and which [Creative Commons](#) licence will apply to this Work are set out in our licence referred to above.

Other than as permitted in any relevant BMJ Author's Self Archiving Policies, I confirm this Work has not been accepted for publication elsewhere, is not being considered for publication elsewhere and does not duplicate material already published. I confirm all authors consent to publication of this Work and authorise the granting of this licence.

# The COVID-19 pandemic interim foundation year 1 post and confidence in core skills and competencies: a longitudinal survey

**Dr Cristina Gatti**

**MBBS BSc (Hons) MSc PGCert (MedEd)**

[cristina.gatti1@nhs.net](mailto:cristina.gatti1@nhs.net)

Royal Devon and Exeter NHS Foundation Trust, Exeter, EX2 5DW, UK.

ORCID ID: [0000-0002-3620-0018](https://orcid.org/0000-0002-3620-0018)

**Dr Kathryn Parker-Conway**

**MBBS MRes (Corresponding Author)**

[kathryn.parker-conway@nhs.net](mailto:kathryn.parker-conway@nhs.net)

Imperial College Healthcare NHS Trust, London, UK.

Correspondence to: [kathryn.parker-conway@nhs.net](mailto:kathryn.parker-conway@nhs.net)

ORCID ID: [0000-0002-6020-0149](https://orcid.org/0000-0002-6020-0149)

**Professor Michael Okorie**

**MBBS FRCP PhD**

[michael.okorie@nhs.net](mailto:michael.okorie@nhs.net)

Brighton and Sussex Medical School and University Hospitals Sussex NHS Foundation Trust, Eastern Road, Brighton, UK.

ORCID ID: [0000-0003-1960-8860](https://orcid.org/0000-0003-1960-8860)

# Abstract

## Objectives

The interim foundation year 1 (FiY1) post was created in response to the COVID-19 pandemic to help bolster the workforce and manage increased clinical pressures. This study aimed to assess the impact of the FiY1 post on medical graduates' self-reported confidence in common tasks, core skills, competencies and procedures prior to starting FY1, as a measure of increasing preparedness for practice.

## Setting

A longitudinal survey was performed at a tertiary teaching hospital in the South East of England. FiY1 posts ran June-August 2020.

## Participants

Questionnaires were sent to 122 medical graduates from a single medical school (recipients included FiY1s and non-FiY1s) and to 69 FiY1s at a single Teaching Hospital NHS Trust, irrespective of medical school attended. Initial and follow-up questionnaires had 86 and 62 respondents respectively. Of these, 39 graduates were matched; 26 were FiY1s and 13 non-FiY1s. The 39 matched results were analysed.

## Primary outcome measures

Confidence levels in common FY1 tasks, core procedures and competencies were gathered before and after the FiY1 post through online questionnaires. Change in confidence comparing FiY1's and non-FiY1's was measured and analysed using linear regression.

## Results

On a 5-point scale, the FiY1 post increased overall confidence in starting FY1 by 0.62 (95% CI 0.072-1.167,  $p=0.028$ ). The FiY1 post increased confidence in performing venepuncture by 0.32 (95% CI 0.011-0.920,  $p=0.045$ ), performing IV cannulation by 0.48 (95% CI 0.030-1.294,  $p=0.041$ ), and recognising, assessing and initiating the management of the acutely ill patient by 0.32 (95% CI 0.030-1.301,  $p=0.041$ ).

## Conclusions

The COVID-19 pandemic FiY1 post improved confidence in core skills and competencies. These findings may help guide future educational interventions in conjunction with further larger scale studies, ultimately aiding to bridge the transition gap between being a medical student and a doctor.

# Article summary

## Strengths and limitations of this study

- This study assessed the interim FY1 post's impact on graduates' self-reported confidence in common FY1 tasks, core skills, competencies and procedures, prior to starting FY1;
- The study benefited from prospective data collection longitudinally, involving questionnaires before and after the interim post;
- Due to the small sample size as many participants could not be matched, and this being a single-centre study, our findings are less transferable;
- The study relies on self-assessment of confidence which may present inaccuracies;
- Further research to determine the effectiveness of a similar post may inform future planning of undergraduate medical curricula.

## Introduction

The COVID-19 pandemic caused widespread disruption to hospital services, clinical guidance and medical education. Medical graduates embarking on life as junior doctors were faced with this new challenge in addition to the notoriously difficult transition to working life. The interim foundation year 1 (FiY1) post intended for medical graduates was designed as a direct consequence of the pandemic to help bolster the workforce, and it changed the transition process from medical student to junior doctor nationwide.

Prior to the pandemic, UK Medical graduates directly entered the two-year Foundation Programme (FP), comprising Foundation Year 1 (FY1) and 2 (FY2), upon completion of their studies (1). The FP aims to support educational and professional development, and to assist junior doctors in achieving the skills and competencies required to manage patients in acute and community environments (1). Evidence of competencies are logged within an e-Portfolio and reviewed by supervisors (2). Progression from FY1 to FY2 requires all expected competencies, skills and procedures to have been achieved (2). A number of large-scale reviews have evaluated the FP following its initiation in 2005; the strengths include trainees' exposure to various clinical settings and specialties, and the standardisation of clinical requirements amongst trainees, allowing for quality assurance (3, 4). Notably, recommendations for development include improving the transition for doctors entering foundation training, suggesting the implementation of supported and supervised environments (4).

1  
2  
3 The pandemic presented a new opportunity with the creation of the FiY1 post. This post  
4 offered medical graduates the option of initiating work early in a salaried, supernumerary  
5 position, for up to two months between June-July 2020 (5), prior to starting FY1.  
6  
7

8 Starting work as a junior doctor following graduation is difficult. Medical graduates find the  
9 uncertainty, increased responsibility and pressure associated with their new role often leads  
10 to feelings of inadequacy and anxiety (6, 7). This issue is reflected in hospital inpatient  
11 mortality rates which rise by 6% on the first day new junior doctors start in August; so-called  
12 'Black Wednesday'(8). Thus, scrutiny turned to improving medical students' transition to  
13 junior doctors, focusing on improving their preparedness for clinical practice (PfP) (9, 10). PfP  
14 has been defined as when students gain the knowledge, skills and behaviours expected of  
15 doctors to allow them to practise safely and gain patient trust (11). PfP improves patient  
16 safety and reduces long-term risk of burnout (12). Preparedness is helped when graduates'  
17 confidence in themselves improves but is often difficult to conceptualise (11). Although  
18 graduates tend to be well-prepared in history-taking, clinical examination and some practical  
19 procedures, they are less prepared in clinical reasoning, managing acutely unwell patients,  
20 prescribing, and complex communication scenarios such as breaking bad news. Moreover,  
21 they are less comfortable working within a multidisciplinary team (MDT) and lack familiarity  
22 with ward environments (13).  
23  
24  
25  
26  
27  
28  
29

30 In a bid to ensure PfP amongst medical graduates, the General Medical Council (GMC)  
31 previously outlined various educational interventions within medical school curricula  
32 including clinical placements, assistantships, shadowing and an induction (9, 12, 14, 15).  
33 Assistantships are clinical placements where the student's role, as described by the GMC, is  
34 to 'assist' junior doctors, partake in out-of-hours on-call work, perform practical skills,  
35 manage unwell patients, and prescribe under supervision (15). Assistantships have been  
36 positively received as an intervention in preparing students for practice, with students feeling  
37 increased confidence in managing acute situations, gaining responsibility, on-call work,  
38 integrating into a team, administrative skills and duties of an FY1, and in therapeutics (16-20).  
39 This is consistent with the growing body of evidence which suggests that greater time spent  
40 in clinical practice encourages experiential learning and therefore better PfP (6). Illing *et al.*,  
41 expressed that 'opportunities for learning on the job,' and having 'a role that enables  
42 engagement in supervised clinical practice' are essential to improving PfP (21). Although  
43 assistantships are an established approach to PfP, there is no consensus on the assistantship's  
44 optimal length, setting or structure, and this lack of guidance may limit its impact (22).  
45 Assistantships vary widely between medical schools, and do not fulfil all of their aims (14). For  
46 example, Burford *et al.*, found over half of students had limited hands-on experience in acute  
47 care (23). In addition, the GMC 2019 National Training Survey found that 34% of medical  
48 graduates continue to feel unprepared for practice, an increase of 5% in the last 5 years (12).  
49 Thus, the optimal approach to preparing medical students for clinical practice requires  
50 ongoing review.  
51  
52  
53  
54  
55  
56  
57  
58  
59  
60

1  
2  
3 The COVID-19 pandemic caused significant disruption to UK medical school curricula but also  
4 provided a unique opportunity to introduce the FiY1 posts. These posts increased exposure  
5 to the clinical environment. However, the impact of these posts on graduates' preparedness  
6 is unknown. This study aimed to assess the impact of the FiY1 post on medical graduates' self-  
7 reported confidence in common tasks, core skills, competencies and procedures prior to  
8 starting FY1, as a measure of increasing PfP.  
9  
10  
11  
12

## 13 14 15 **Methods**

### 16 17 18 **Cohort**

19 This was a prospective longitudinal study of medical graduates from the class of 2020. Medical  
20 graduates were invited to participate from Brighton and Sussex Medical School (BSMS) and  
21 those offered FiY1 posts at Brighton and Sussex University Hospitals (BSUH - now part of  
22 University Hospitals Sussex NHS Foundation Trust). The 2-month FiY1 post ran from June-July  
23 2020. The cohort of respondents were divided into two groups, those who completed the  
24 interim FY1 post (FiY1) and those who did not (non-FiY1). The non-FiY1's (control group)  
25 finished the medical school programme at BSMS and did not complete FiY1 posts.  
26  
27  
28  
29

### 30 31 32 **Research and Ethics Approval**

33 The study was exempted from a formal NHS ethical review following completion of the self-  
34 appraisal questionnaire of the NHS Health Research Authority. However, full approval was  
35 provided by the Research and Development (R&D) Department at BSUH prior to  
36 commencement of the study.  
37  
38

### 39 40 41 **Patient and Public Involvement**

42 As this study elicited self-assessed confidence in core skills and competencies of FiY1s,  
43 patients and the public were not involved in the design, conduct, reporting, or dissemination.  
44

### 45 46 47 **Data collection**

48 An initial and a follow-up questionnaire were sent to medical graduates before and after the  
49 interim post period. The questionnaires were created on Google Forms and sent via e-mail  
50 and social media (see Appendix 1 and Appendix 2). This was incentivised with a £40 voucher  
51 prize draw. All participants gave informed consent before proceeding with the study  
52 questionnaires.  
53

54 The questionnaires were formulated by authors Cristina Gatti (CG), Kathryn Parker-Conway  
55 (KPC), and Michael Okorie (MO), and piloted amongst nine UK-trained doctors who were  
56 undertaking the Postgraduate Certificate in Medical Education. The pilot group was familiar  
57 with the topic and was representative of the larger survey group in terms of age, gender and  
58 background. They responded to the questionnaire as if they were FiY1s or non-FiY1s, and fed  
59  
60

back their suggestions for change in written format. A systematic error and minor usability issues were identified and subsequently corrected.

The online questionnaire was created to measure medical graduates' overall self-reported confidence in starting FY1, in common FY1 tasks, core procedures and competencies. Confidence was selected as the outcome measure to reduce ambiguity associated with the term 'prepared'. Each outcome had a five-point confidence scale (see Appendix 1 and Appendix 2). The core procedures and competencies are as outlined by the Horus ePortfolio (Tables 1-2). These are set by the UK Foundation Programme in conjunction with the GMC, and need to be achieved by all FY1 trainees to progress to FY2. Common FY1 tasks are jobs FY1s are frequently expected to complete, formulated by foundation doctors CG and KPC, and agreed by consultant MO who is experienced in medical education research (Table 3). Data were collected on: demographics, medical school attended, and the NHS Trust and specialty of both the interim and upcoming FY1 posts. A brief evaluation of the FY1 post was included in the follow-up questionnaire (Appendix 2), which included open and closed questions to assess the advantages and disadvantages of the post, as well as its structure.

*Table 1. The UK Foundation Programme Curriculum's outline of the FY1 core skills and competencies and procedures*

| <b>Clinical care: Core skills and competencies</b>                                                                                                                                                                                                                                                                                                                                                                                                                                                                                                                                                                                                                                                |
|---------------------------------------------------------------------------------------------------------------------------------------------------------------------------------------------------------------------------------------------------------------------------------------------------------------------------------------------------------------------------------------------------------------------------------------------------------------------------------------------------------------------------------------------------------------------------------------------------------------------------------------------------------------------------------------------------|
| <ol style="list-style-type: none"> <li>1. Recognises, assesses and initiates management of the acutely ill patient</li> <li>2. Recognises, assesses and manages patients with long term conditions</li> <li>3. Obtains history, performs clinical examination, formulates differential diagnosis and management plan</li> <li>4. Requests relevant investigations and acts upon results</li> <li>5. Prescribes safely</li> <li>6. Performs procedures safely</li> <li>7. Is trained and manages cardiac and respiratory arrest</li> <li>8. Demonstrates understanding of the principles of health promotion and illness prevention</li> <li>9. Manages palliative and end of life care</li> </ol> |

*Table 2. The UK Foundation Programme Curriculum's outline of the FY1 core procedures*

| <b>Core Procedures</b> |
|------------------------|
|------------------------|



1. Venepuncture
2. IV cannulation
3. Prepare and administer IV medications and injections
4. Arterial puncture in an adult
5. Blood culture from peripheral sites
6. Intravenous infusion including the prescription of fluids
7. Intravenous infusion of blood and blood products
8. Injection of local anaesthetic to skin
9. Injection – subcutaneous (e.g. insulin or LMW heparin)
10. Injection – intramuscular
11. Perform and interpret an ECG
12. Perform and interpret peak flow
13. Urethral catheterisation (male)
14. Urethral catheterisation (female)
15. Airway care including simple adjuncts (e.g. Guedel airway or laryngeal masks)

Table 3. Common FY1 tasks included in initial and follow-up questionnaires

| Common FY1 tasks                                                                                                                                                                                                                                                                                                                                                                                                                                      |
|-------------------------------------------------------------------------------------------------------------------------------------------------------------------------------------------------------------------------------------------------------------------------------------------------------------------------------------------------------------------------------------------------------------------------------------------------------|
| <i>Please rate your confidence on a scale of 1-5. 1 = Not confident, 2 = Slightly confident, 3= Somewhat confident, 4 = Moderately confident, 5 = Very confident</i>                                                                                                                                                                                                                                                                                  |
| <ol style="list-style-type: none"> <li>1. In using IT systems at Brighton and Sussex University Hospitals, e.g. Medway, Bamboo/Panda, ICE, PACS</li> <li>2. In writing discharge summaries (TTOs)</li> <li>3. In making referrals (such as to other specialties, or for investigations)</li> <li>4. In requesting imaging (including CT scans which require discussion with radiologists)</li> <li>5. In speaking to relatives of patients</li> </ol> |

## Data analysis

Data were analysed using IBM SPSS Statistics 25.0. The curriculum outcomes most relevant to the FY1 role were selected for analysis, along with all the common FY1 tasks. The five-point confidence scale for each outcome was converted to a numerical scale 1-5 (i.e. a score of 1 equated to 'not confident,' 2 to 'slightly confident,' 3 to 'somewhat confident,' 4 to 'moderately confident,' and 5 to 'very confident'). The change in confidence was calculated as a numeric difference between response for each question in the initial and follow-up questionnaires for each individual. Linear regression was performed to analyse the impact of the FY1 post on change in confidence, adjusting for age, gender and university attended (BSMS or other).

Descriptive statistics were completed for closed questions evaluating the FiY1 post. The open questions describing advantages, disadvantages and improvements were analysed by CG and KPC using an inductive approach to identify the most common themes.

## Results

### Descriptive data

The online questionnaires were sent to 122 BSMS medical graduates (89 completed the FiY1 post, 33 did not), in addition to 69 FiY1s at the BSUH Trust, which included graduates from both BSMS and other UK universities. It was not possible to identify overlap in the two groups due to incomplete demographic information. The initial questionnaire was open 5<sup>th</sup>-12<sup>th</sup> June 2020 (8 days) and had 86 respondents. The follow-up questionnaire was open 20<sup>th</sup>-30<sup>th</sup> July 2020 (11 days) with 62 respondents. Of these, 39 graduates could be matched using recorded e-mail addresses (Figure 1).

The matched cohort consisted of 26 FiY1s, and 13 non-FiY1s. One participant was excluded as they did not work in a clinical post (Table 4). Over two thirds (71.1%) of graduates were from white backgrounds, other graduates identified as black (7.9%), mixed (10.5%) or Asian (10.5%).

Table 4. Descriptive data of participants in the matched cohort

|                               | Matched FiY1s (n= 26) |      | Matched non-FiY1s (n=13) |      |
|-------------------------------|-----------------------|------|--------------------------|------|
|                               | No.                   | %    | No.                      | %    |
| <b>Gender</b>                 |                       |      |                          |      |
| Female                        | 15                    | 57.7 | 8                        | 61.5 |
| Male                          | 11                    | 42.3 | 5                        | 38.5 |
| <b>Age (years)</b>            |                       |      |                          |      |
| 18-24                         | 15                    | 57.7 | 11                       | 84.6 |
| 25 and over                   | 11                    | 42.3 | 2                        | 15.4 |
| <b>Ethnicity</b>              |                       |      |                          |      |
| Asian / Black / Mixed / Other | 5                     | 19.2 | 6                        | 46.2 |
| White                         | 21                    | 80.8 | 7                        | 53.8 |
| <b>Medical School</b>         |                       |      |                          |      |

|                            |    |      |   |      |
|----------------------------|----|------|---|------|
| BSMS                       | 12 | 46.2 | 9 | 69.2 |
| Other                      | 14 | 53.8 | 4 | 30.8 |
| <b>FiY1 Hospital Trust</b> |    |      |   |      |
| BSUH                       | 19 | 73.1 | 6 | 46.2 |
| Other                      | 7  | 26.9 | 7 | 53.8 |
| <b>FiY1 Specialty</b>      |    |      |   |      |
| Medicine                   | 19 | 73.1 | 8 | 61.5 |
| Other                      | 7  | 26.9 | 5 | 38.5 |

## Overall evaluation of the FiY1 post

The FiY1 post ranged from 5-9 weeks (average 7.7 weeks). Over a quarter of graduates (28%) said they would not do the FiY1 post unpaid, half (48%) would 'maybe' consider it. Nearly all graduates (23/25 = 92%) recommended the FiY1 post for the next year. Advantages of the FiY1 were described as gaining practical hands-on clinical experience within the role of an FY1 and managing acutely unwell patients, familiarisation with the ward environment, and being supernumerary, which was frequently linked with being well supported. Disadvantages raised were lack of clarity of FiY1 responsibilities (5/25 =20%), less rest before starting FY1 (6/25 =24%), and a minority (3/25 = 12%) felt unsupported. Suggested improvements included having a better induction, more on call experience and having a clearer role.

## Impact of FiY1 post on confidence

Linear regression modelling indicated that the FiY1 post increased overall confidence in starting FY1 by 0.62 (95% CI 0.072-1.167, p=0.028). In addition, the FiY1 post increased confidence in performing venepuncture by 0.32 (95% CI 0.011-0.920, p=0.045), performing IV cannulation by 0.48 (95% CI 0.030-1.294, p=0.041), and recognising, assessing and initiating the management of the acutely ill patient by 0.32 (95% CI 0.030-1.301, p=0.041). There was weak evidence to suggest that the FiY1 post improved confidence in using IT systems at BSUH by 0.92 (95% CI -0.052-1.621, p=0.065) and in requesting relevant investigations and acting upon results by 0.48 (95% CI -0.057 to +1.288, p=0.072) (Table 5).

This study found no evidence to suggest the FiY1 post increased confidence in writing discharge summaries, making referrals, speaking to patients' relatives, performing an arterial blood gas, prescribing blood products, history-taking, performing clinical examination, formulating differential diagnoses and management plans, or in managing palliative and end of life care patients (Table 5). However, an overall positive trend was noted in all these outcomes. Furthermore, there was no evidence to suggest the FiY1 post increased confidence in requesting imaging investigations, in safe prescribing, and in being trained in managing

1  
2  
3 cardiac and respiratory arrest. When adjusting for age, gender, and university, a positive trend  
4 was not observed, with beta coefficients of approximately 0. There was generally no effect  
5 seen for the variables adjusted for, except in the outcome of being 'trained and managing  
6 cardiac and respiratory arrest,' in which females were less confident than males by 0.80 (95%  
7 CI -1.374- -0.218, p=0.008).  
8  
9  
10  
11  
12  
13  
14  
15  
16  
17  
18  
19  
20  
21  
22  
23  
24  
25  
26  
27  
28  
29  
30  
31  
32  
33  
34  
35  
36  
37  
38  
39  
40  
41  
42  
43  
44  
45  
46  
47  
48  
49  
50  
51  
52  
53  
54  
55  
56  
57  
58  
59  
60

For peer review only

Table 5. Change in confidence per outcome for matched cohort (n=38)

| Outcome                                                            | Mean change in confidence FiY1s (n = 25) | Mean change in confidence non-FiY1s (n = 13) | Difference in mean change in confidence (unadjusted) | Beta coefficient | 95% CI                 | P value |
|--------------------------------------------------------------------|------------------------------------------|----------------------------------------------|------------------------------------------------------|------------------|------------------------|---------|
| <i>Confidence in starting FY1</i>                                  | +0.48                                    | -0.23                                        | +0.71                                                | +0.620           | 0.072<br>to<br>+1.167  | 0.028   |
| <i>In using IT systems at BSUH</i>                                 | +0.92                                    | -0.08                                        | +1.00                                                | +0.785           | -0.052<br>to<br>+1.621 | 0.065   |
| <i>In writing discharge summaries (TTOs)</i>                       | +0.96                                    | +0.38                                        | +0.58                                                | +0.524           | -0.237<br>to<br>+1.286 | 0.171   |
| <i>In making referrals</i>                                         | +1.16                                    | +0.46                                        | +0.70                                                | +0.596           | -0.154<br>to<br>+1.347 | 0.116   |
| <i>In requesting imaging</i>                                       | +0.80                                    | +0.69                                        | +0.11                                                | -0.011           | -0.849<br>to<br>+0.827 | 0.979   |
| <i>In speaking to relatives of patients</i>                        | +0.64                                    | +0.15                                        | +0.49                                                | +0.439           | -0.325<br>to<br>+1.204 | 0.251   |
| <i>Performing venepuncture</i>                                     | +0.36                                    | -0.08                                        | +0.44                                                | +0.466           | +0.011<br>to<br>+0.920 | 0.045   |
| <i>Performing IV cannulation</i>                                   | +0.48                                    | -0.15                                        | +0.63                                                | +0.662           | +0.030<br>to<br>+1.294 | 0.041   |
| <i>Performing an arterial puncture (an ABG)</i>                    | +0.48                                    | -0.08                                        | +0.56                                                | +0.598           | -0.273<br>to<br>+1.469 | 0.172   |
| <i>Administering intravenous infusions and fluid prescriptions</i> | +0.20                                    | +0.08                                        | +0.12                                                | +0.106           | -0.619<br>to<br>+0.832 | 0.768   |
| <i>Prescribing blood and blood products</i>                        | +0.52                                    | +0.23                                        | +0.29                                                | +0.243           | -0.343<br>to<br>0.828  | 0.405   |
| <i>Urethral catheterisation</i>                                    | 0.00                                     | -0.31                                        | +0.31                                                | +0.224           | -0.443<br>to           | 0.500   |

|                                                                                                              |       |       |       |        |                        |       |
|--------------------------------------------------------------------------------------------------------------|-------|-------|-------|--------|------------------------|-------|
| <i>(male)</i>                                                                                                |       |       |       |        | +0.891                 |       |
| <i>Recognises, assesses and initiates management of the acutely ill patient</i>                              | +0.32 | -0.38 | +0.70 | +0.666 | +0.030<br>to<br>+1.301 | 0.041 |
| <i>Obtains history, performs clinical examination, formulates differential diagnosis and management plan</i> | +0.32 | +0.08 | +0.24 | +0.155 | -0.412<br>to<br>+0.723 | 0.582 |
| <i>Requests relevant investigations and acts upon results</i>                                                | +0.48 | -0.08 | +0.56 | +0.615 | -0.057<br>to<br>+1.288 | 0.072 |
| <i>Prescribes safely</i>                                                                                     | +0.20 | +0.15 | +0.05 | -0.029 | -0.460<br>to<br>+0.402 | 0.891 |
| <i>Is trained and manages cardiac and respiratory arrest</i>                                                 | +0.24 | +0.31 | -0.07 | -0.105 | -0.726<br>to<br>0.515  | 0.732 |
| <i>Manages palliative and end of life care</i>                                                               | +0.60 | -0.08 | +0.68 | +0.562 | -0.132<br>to<br>+1.255 | 0.109 |

## Discussion

The FiY1 post was an intervention initiated in response to the COVID-19 pandemic to support potential increased workforce demands. It changed the way medical graduates transition to the role of junior doctors. This prospective longitudinal cohort study assessed whether the FiY1 post was able to impact graduates' PFP in terms of self-reported confidence in common FY1 tasks, core skills, competencies and procedures, prior to starting FY1. To our knowledge, this is the first study of its kind.

## Improved Confidence in Core skills, Competencies and FY1 tasks

Graduates who completed the FiY1 post showed an increase in overall confidence in starting FY1 compared to non-FiY1s. They also had an increased confidence in performing FY1 core skills (venepuncture, IV cannulation), in competencies including management of acutely ill patients and requesting investigations, and in common FY1 tasks, including use of IT systems. Interestingly, this improved confidence occurred within a brief and relatively unplanned intervention (average post length was 7.7 weeks).

This increased confidence is likely to be related to the FiY1 post allowing for increased clinical exposure, as clinical experience improves competence and reduces the stress of transition from student to doctor (7, 24). This relationship has previously been documented following assistantships and shadowing periods, where hands-on experience increased student's understanding of FY1 duties, including how to request investigations, write in notes, prescribe, and use IT systems (16-18, 23, 25, 26). This study showed the FiY1's additional benefit of improving confidence in managing acutely unwell patients, a competency which showed little or no improvement following assistantships/shadowing periods (23). The FiY1 post also provided an opportunity for familiarisation with the clinical environment, which likely contributed to improved confidence in using IT systems, particularly for the 50% of FiY1's who continued to work in the same NHS Trust as their FiY1 post. At the time of writing, there is a dearth of articles published on the FiY1 post. However, a GMC commissioned study report reviewing the FiY1 post concluded that amongst its benefits it eased transition to starting FY1 and it increased preparedness to practice, with this finding being sustained 2 months later (27). Three reflective articles have also noted the positive benefit of FiY1 roles in providing opportunities to put theory into practice, increase clinical experience, and improve confidence, though there was no formal measurement of change in confidence outlined (28-30).

Though the remaining common FY1 tasks, core skills and competencies did not show a significant increase in self-reported confidence, most showed an overall positive trend. Given the relatively small sample size, a significant increase may be observed in these outcomes in a larger powered study, as noted in the GMC report (27). However, it may also indicate that graduates were already confident in some aptitudes prior to commencing FiY1, particularly in history-taking and performing clinical examinations (13). Another explanation may be that graduates did not gain significant experience in these areas during FiY1. For example, in formulating management plans, as ward rounds are often led by senior doctors. The opportunity for managing cardiac arrest is limited for all foundation doctors, which likely reflects the lack of exposure within the FiY1 post. It is disappointing that there was no observed increase in confidence in prescribing. However, an initial lack of clarity as to whether FiY1s were allowed to prescribe might have confounded results.

1  
2  
3 A further advantage of the FiY1 post over previous interventions is the ability to experience  
4 the role of an FY1 as a doctor rather than a student, and developing an increased sense of  
5 responsibility. The increased responsibility noted when starting as a doctor is particularly  
6 daunting (7). As such emulating this increased obligation whilst still being supervised is helpful  
7 to reduce the shock of transition to FY1 (6). Assistantships have previously been documented  
8 as creating an increased sense of responsibility, but how students experience assistantships  
9 is varied and dependent on student engagement, meaning not all students benefit from these  
10 outcomes equally (19, 22, 23). The standardised nature of the FiY1 may minimise the disparity  
11 in student experiences. Moreover, during the FiY1 posts, graduates were expected to work as  
12 doctors to support the workforce during the pandemic, and were being paid as such for this  
13 role. Consequently, they may have felt duty-bound to take on more responsibility compared  
14 to during assistantships, and likewise staff may have had greater expectations of them to step  
15 up as doctors (31). FiY1s wanted to be remunerated for this increased responsibility, with 28%  
16 of graduates advising they would not do the FiY1 post unpaid, and 48% who would only  
17 'maybe' consider it. As per the GMC report on the FiY1 post, the 'paid role of the FiY1 post  
18 adds something beyond undergraduate placements and assistantships' (27).

26  
27 Though the FiY1 post may have been demanding on graduates, the majority felt well  
28 supported, and some associated this with having been supernumerary. A supportive  
29 environment is essential in negotiating this challenging transition and its associated stress,  
30 particularly as new doctors can be reluctant to seek help (7, 32). The supportive environment  
31 may be why Durand-Hill *et al.*, found that the FiY1 post led to graduates feeling less stressed  
32 and depressed (33). Another approach to creating a supportive environment was used in  
33 Northern Ireland – termed the 'compassionate leadership model,' where students were  
34 provided with a 'buddy system' and encouraged to highlight their educational needs for the  
35 FiY1 post. This approach helped students feel valued and supported (34). Over the two-month  
36 period, the observed trends suggested non-FiY1s had decreased confidence in some  
37 outcomes. This may be due to time spent with reduced exposure to the clinical setting, and  
38 increasing anxiety as they missed the benefits of this period of supported learning (33).

### 44 **Disadvantages of FiY1**

45  
46 Only two graduates (8%) who completed the FiY1 post did not recommend it next year,  
47 correlating with the minority who felt unsupervised. Themes raised included lack of clarity of  
48 FiY1 responsibilities and their role. This is an issue that transcends previous educational  
49 interventions, as students want more guidance as to what is expected of them (26, 35). Cotton  
50 *et al.*, noted that benefits can be lost if roles are ill-defined (26).

51  
52  
53  
54 Graduates were able to select an FiY1 post at either their university hospital, a hospital in  
55 their home region, or the hospital where they were due to start FY1. Therefore, only 52% of  
56 FiY1s worked in the same trust as their future FY1 role, and only 36% worked in the same  
57 specialty. Analysis to compare the outcomes of graduates that did or did not have an 'aligned'  
58 placement was not possible due to sample size. However, there is evidence that suggests that  
59  
60



benefits are reduced if the placement is not relevant to them or relates less closely to where they will start work (19, 26). Instead, alignment with a student's first FY1 post enhances their experience, though this benefit is not sustained to the second FY1 post (19, 20, 36).

## Study limitations

As the statistical analysis was exploratory, and sample size was small due to fewer matched participants, interpretation of results is limited. This increases the risk that real differences in confidence could have been missed. Due to this being a single-centre study, our findings are potentially less transferable and reproducible. A majority of the FiY1s worked at BSUH, and all the non-FiY1s were BSMS graduates, so the experiences of the interim FY1 may be different elsewhere in the UK. BSMS benefits from an integrated curriculum design with early clinical exposure, so graduates from more traditional courses may find additional benefit to an FiY1 post. Conversely, medical schools with well-established assistantship programmes may find their graduates have less to gain. The majority of participants had interim posts in medical specialties, so benefits of posts particularly in psychiatry or surgery are unknown.

The outcomes of this study relied on self-reported confidence. Though there was an increase in self-reported confidence, it is unclear how this confidence impacts on junior doctor outcomes and on patient care. This is something that has been highlighted previously with regards to assistantships; there is no peer-reviewed data available evaluating the impact of assistantships on outcomes including efficiency, patient safety, prescribing errors, stress and sickness (22). In addition, there was no external assessment of participants' change in confidence which subjects the findings to bias. Self-assessments are not always aligned with reality. Tallentire *et al.*, found that participants had misplaced confidence when it came to practical procedures with supervisors rating graduates' ability lower than graduates did themselves (37). Conversely, it is possible that graduates may have improved their skills in an outcome but still remained unconfident.

The loss of participants to follow-up presented another limitation. We tried to minimise this limitation by extending the response period of the questionnaire and providing a recall incentive. Despite the small numbers of matched participants, we did observe differences between FiY1s and non-FiY1s. However, with larger participant numbers, we could have continued to follow-up participants to measure change in confidence after starting FY1.

## Future of FiY1 roles

Despite the limitations of this study, the initial findings are promising. Further studies assessing the role of the FiY1 as a trial intervention in multiple centres across the UK may provide more robust evidence of the FiY1's future role in undergraduate medical curricula. A study protocol for the 'COVIDReady2' survey has outlined its aim to fulfil the above by exploring nationwide experiences of medical students who underwent the FiY1 compared to

1  
2  
3 those who did not, with a view to offering practical advice as to how these roles may be  
4 incorporated into future medical education (38). Assessing the impact of the FiY1 post on  
5 long-term outcomes including patient safety, prescribing errors, efficiency at work, and levels  
6 of stress and sickness would also determine the objective impact of this study. In addition,  
7 rates of mortality following junior doctors starting should be calculated since the initiation of  
8 educational interventions such as the assistantship and potentially future FiY1 posts, given  
9 the last study was in 2009 (8).

10  
11  
12  
13  
14 Recommendations for future trials of FiY1 posts are as follows:

- 15  
16 • A financial incentive should be maintained to help encourage engagement and an  
17 environment where increased responsibility is expected and supervised.
  - 18 • A supernumerary position should be preserved to ensure good supervision is maintained.
  - 19 • A unified and clear outline of roles and responsibilities should be created, including  
20 provision of supervised prescribing, so as to assist improved confidence in this domain.
- 21  
22  
23  
24  
25

## 26 27 28 29 30 31 32 33 34 35 36 37 38 39 40 41 42 43 44 45 46 47 48 49 50 51 52 53 54 55 56 57 58 59 60

In summary, the FiY1 post, implemented in response to the COVID-19 pandemic, has inadvertently created an opportunity to improve clinical exposure for medical graduates. This study showed that the FiY1 post improves overall confidence prior to starting FiY1 and in specific core skills and competencies required by the GMC. The post is similar to an assistantship in its aims to improve student's preparedness and ease the transition to work life. However, there are key differences in that the FiY1 post is paid, graduates are expected to work as doctors and not students, and its standardised nature means all graduates should gain a more unified experience. Moreover, the FiY1 has resulted in greater hands-on experience, and improved confidence in managing acutely unwell patients.

The FiY1 post has the potential to provide new-found structure and streamline final year placements across medical schools. It could standardise educational opportunities nationwide, and ease the unsettling transition from student to doctor in a way that medical curricula have not facilitated before. This could revolutionise curriculum design.

## Footnotes

**Contributors and guarantor information:** CG and KPC contributed equally to this paper; they have joint first authorship. All authors (CG, KPC, MO) substantially contributed to the planning, drafting and reviewing of the work described in the article, each approving the final version. CG and KPC oversaw the production of the manuscript in equal contribution and are guarantors for the overall content. MO assisted in study design and reviewing the work. The

1  
2  
3 corresponding author attests that all listed authors meet authorship criteria and that no  
4 others meeting the criteria have been omitted.  
5  
6

7 **Acknowledgements:** We thank Chris Jones (Brighton and Sussex Medical School) for his  
8 support with statistical analysis. We thank the medical educators who piloted our survey.  
9  
10

11 **Copyright/license for publication:** The Corresponding Author has the right to grant on behalf  
12 of all authors and does grant on behalf of all authors, a worldwide licence to the Publishers  
13 and its licensees in perpetuity, in all forms, formats and media (whether known now or  
14 created in the future), to i) publish, reproduce, distribute, display and store the Contribution,  
15 ii) translate the Contribution into other languages, create adaptations, reprints, include within  
16 collections and create summaries, extracts and/or, abstracts of the Contribution, iii) create  
17 any other derivative work(s) based on the Contribution, iv) to exploit all subsidiary rights in  
18 the Contribution, v) the inclusion of electronic links from the Contribution to third party  
19 material where-ever it may be located; and, vi) licence any third party to do any or all of the  
20 above.  
21  
22  
23  
24  
25

26  
27 **Competing interests declaration:** All authors have completed the ICMJE uniform disclosure  
28 form at [www.icmje.org/coi\\_disclosure.pdf](http://www.icmje.org/coi_disclosure.pdf) and declare: no support from any organisation for  
29 the submitted work; no financial relationships with any organisations that might have an  
30 interest in the submitted work in the previous three years; no other relationships or activities  
31 that could appear to have influenced the submitted work.  
32  
33

34  
35 **Transparency declaration:** The lead author affirms that the manuscript is an honest, accurate,  
36 and transparent account of the study being reported; that no important aspects of the study  
37 have been omitted; and that any discrepancies from the study as originally planned have been  
38 explained. No funding was required for this study. Relevant anonymised participant level data  
39 is available on reasonable request.  
40  
41  
42  
43

44 **Funding:** The authors have not declared a specific grant for this research from any funding  
45 agency in the public, commercial or not-for-profit sectors.  
46  
47

48 **Data sharing:** All authors agree to share data included in this work as required.  
49  
50

## 51 52 53 54 55 56 57 58 59 60

1. UK Foundation Programme [Internet]. Curriculum c2022 [cited 2022 Aug 24]. Available from: <https://foundationprogramme.nhs.uk/curriculum/>
2. [Health Education England \[Internet\]](#). E-portfolio Guidance for Foundation Year 1 Doctors c2016 [cited 2022 Aug 24]. Available from:

- 1  
2  
3 [https://www.rftmedicaleducation.com/uploads/4/1/3/2/41322767/2016\\_07\\_25\\_2016-17\\_f1\\_hee\\_yh\\_eportfolio\\_guidance.pdf](https://www.rftmedicaleducation.com/uploads/4/1/3/2/41322767/2016_07_25_2016-17_f1_hee_yh_eportfolio_guidance.pdf)
- 4  
5  
6 3. [Collins J. Foundation for excellence: an evaluation of the foundation programme. London: Medical Education England; 2010 Oct.](#)
- 7  
8  
9 4. [Health Education England \[Internet\].](#) Supported from the start; ready for the future; The Postgraduate Medical Foundation Programme Review c2019 [cited 2022 Aug 24]. Available from: <https://www.hee.nhs.uk/sites/default/files/documents/FoundationReview%20FINAL%20for%20web.pdf>
- 10  
11  
12  
13  
14  
15  
16 5. General Medical Council [Internet]. Joint statement: early provisional registration for final year medical students c2020 [cited 2021 Mar 26]. Available from: <https://www.gmc-uk.org/news/news-archive/early-provisional-registration-for-final-year-medical-students>
- 17  
18  
19  
20  
21  
22 6. Coakley N, O'Leary P, Bennett D. 'Waiting in the wings'; Lived experience at the threshold of clinical practice. *Med Educ.* 2019;53(7):698-709.
- 23  
24  
25 7. Brennan N, Corrigan O, Allard J, Archer J, Barnes R, Bleakley A, et al. The transition from medical student to junior doctor: today's experiences of Tomorrow's Doctors. *Med Educ.* 2010;44(5):449-58.
- 26  
27  
28 8. Jen MH, Bottle A, Majeed A, Bell D, Aylin P. Early in-hospital mortality following trainee doctors' first day at work. *PLoS One.* 2009;4(9):e7103.
- 29  
30  
31 9. Gaskell N, Hinton R, Page T, Elvins T, Malin A. Putting an end to Black Wednesday: Improving patient safety by achieving comprehensive trust induction and mandatory training by day 1. *J Clin Med.* 2016;16(2):124-8.
- 32  
33  
34  
35 10. Teagle AR, Gainsborough N, Haq I, Okorie M, George M. Preparing medical students for clinical practice: easing the transition. *Perspectives on Med Ed.* 2017;6(4):277-80.
- 36  
37  
38 11. Monrouxe LV, Bullock A, Gormley G, Kaufhold K, Kelly N, Roberts CE, et al. New graduate doctors' preparedness for practice: A multistakeholder, multicentre narrative study. *BMJ Open.* 2018;8(8).
- 39  
40  
41  
42 12. General Medical Council [Internet]. The state of medical education and practice in the UK c 2019 [cited 2021 Feb 13]. Available from: [https://www.gmc-uk.org/-/media/documents/somep-2019---full-report\\_pdf-81131156.pdf](https://www.gmc-uk.org/-/media/documents/somep-2019---full-report_pdf-81131156.pdf)
- 43  
44  
45  
46 13. Monrouxe LV, Grundy L, Mann M, John Z, Panagoulas E, Bullock A, et al. How prepared are UK medical graduates for practice? A rapid review of the literature 2009-2014. *BMJ Open.* 2017;7(1).
- 47  
48  
49  
50 14. General Medical Council [Internet]. Clinical placements for medical students: Advice supplementary to Tomorrow's Doctors (2009) c2011. [cited 2021 Mar 29]. Available from: [https://www.gmc-uk.org/-/media/documents/clinical-placements-for-medical-students---guidance-0815\\_pdf-56437824.pdf](https://www.gmc-uk.org/-/media/documents/clinical-placements-for-medical-students---guidance-0815_pdf-56437824.pdf)
- 51  
52  
53  
54  
55 15. General Medical Council [Internet]. Good Medical Practice c2019. [cited 2021 Mar 29]. Available from: <https://www.gmc-uk.org/ethical-guidance/ethical-guidance-for-doctors/good-medical-practice>
- 56  
57  
58  
59  
60

16. Braniff C, Spence RA, Stevenson M, Boohan M, Watson P. Assistantship improves medical students' perception of their preparedness for starting work. *Med Teach*. 2016;38(1):51-8.
17. Ryan PSJ, Gormley GJ, Hart ND. Preparation for practice: a novel role for general practice in pre-foundation assistantships. *Education for primary care: an official publication of the Association of Course Organisers, National Association of GP Tutors, World Organisation of Family Doctors*. 2017;28(4):210-5.
18. Morrison JJ, McGlynn M, Pringle J, Sandle M, Scott H, Cotton P. The university of Glasgow: "Preparation for Practice"-implementation and evaluation of a new student assistantship. *Med. Educ, Supplement*. 2010;44:18.
19. Fullbrook A, Ross M, Mellanby E, Wylde K, Jaap A, Cameron H. Initial experiences of a student assistantship. *Clin Teach*. 2015;12(5):310-4.
20. Jones OM, Okeke C, Bullock A, Wells SE, Monrouxe LV. 'He's going to be a doctor in August': A narrative interview study of medical students' and their educators' experiences of aligned and misaligned assistantships. *BMJ Open*. 2016;6(6).
21. Illing JC, Morrow GM, Rothwell nee Kergon CR, Burford BC, Baldauf BK, Davies CL, et al. Perceptions of UK medical graduates' preparedness for practice: a multi-centre qualitative study reflecting the importance of learning on the job. *BMC Med Educ*. 2013;13:34.
22. Crossley JG, Vivekananda-Schmidt P. Student assistantships: bridging the gap between student and doctor. *Adv Med Educ Pract*. 2015;6:447-57.
23. Burford B, Whittle V, Vance GH. The relationship between medical student learning opportunities and preparedness for practice: a questionnaire study. *BMC Med Educ*. 2014;14:223.
24. Draper CE, Louw GJ. Competence for internship: perceptions of final-year medical students. *Health Educ*. 2012;25(1):16-23.
25. Bindal T, Goodyear H. Newly qualified doctors' views of their job shadowing experiences. *Br J Hosp Med*. 2014;75(9):528-32.
26. Cotton P, Scott H, Morrison J, McGlynn M. Evaluation of preparation for practice block by foundation year 1 doctors: A qualitative study. *Med Educ, Supplement*. 2010;44:219.
27. General Medical Council [Internet]. 2020 Medical Graduates: The work and wellbeing of interim Foundation Year 1 doctors during COVID-19 c2021 [cited 2021 Aug 18]. Available from: <https://www.gmc-uk.org/about/what-we-do-and-why/data-and-research/research-and-insight-archive/2020-medical-graduates---the-work-and-wellbeing-of-interim-foundation-year-1-doctors-during-covid-19>
28. Jones I, Neal-Smith G. FiY1: A reflective account of the foundation interim year 1 post. *J Clin Med*. 2021;21(3):e269.
29. Youssef S, Zaidi S, Shrestha S, Varghese C, Rajagopalan S. First impressions of the foundation interim year 1 postings: positives, pitfalls, and perils. *Med Educ Online*. 2020;25(1):1785116.

- 1
  - 2
  - 3
  - 4
  - 5
  - 6
  - 7
  - 8
  - 9
  - 10
  - 11
  - 12
  - 13
  - 14
  - 15
  - 16
  - 17
  - 18
  - 19
  - 20
  - 21
  - 22
  - 23
  - 24
  - 25
  - 26
  - 27
  - 28
  - 29
  - 30
  - 31
  - 32
  - 33
  - 34
  - 35
  - 36
  - 37
  - 38
  - 39
  - 40
  - 41
  - 42
  - 43
  - 44
  - 45
  - 46
  - 47
  - 48
  - 49
  - 50
  - 51
  - 52
  - 53
  - 54
  - 55
  - 56
  - 57
  - 58
  - 59
  - 60
30. Kaminskaite V. Covid-19: Looking back at the experiences of graduates and educators during the interim Foundation Year 1. *BMJ*. 2021;374:n1265.
31. Reid A-M, Ledger A, Kilminster S, Fuller R. Can the tools of activity theory help us in advancing understanding and organisational change in undergraduate medical education? *Adv Health Sci Edu*. 2015;20(3):655-68.
32. Sturman NA-O, Tan Z, Turner J. "A steep learning curve": junior doctor perspectives on the transition from medical student to the health-care workplace. *BMC Med Educ*. 2017;17(1):92.
33. Durand-Hill M, Ike DI, Nijhawan AN, Shah AB, Dawson A, Awad WI. 841 The psychological impact of Foundation Interim Year 1 Placements on Final Year UK Medical Students Transitioning to Foundation Year One During the COVID Era. *BJS*. 2021;108(Supplement\_2).
34. Dougan C, Philips S-A, Hughes D, Gardiner K. Compassionate leadership during COVID-19: an ABC approach to the introduction of new medical graduates as Foundation interim Year 1s (FiY1s). *BMJ Leader*. 2020:leader-2020-000323.
35. Prince KJ, Boshuizen Hp Fau - van der Vleuten CPM, van der Vleuten Cp Fau - Scherpbier AJA, Scherpbier AJ. Students' opinions about their preparation for clinical practice. *Med Educ*. 2005;39(7):704-12.
36. Wells SE, Bullock A, Monrouxe LV. Newly qualified doctors' perceived effects of assistantship alignment with first post: A longitudinal questionnaire study. *BMJ Open*. 2019;9(3).
37. Tallentire VR, Smith SE, Wylde K, Cameron HS. Are medical graduates ready to face the challenges of Foundation training? *Postgrad Med J*. 2011;87(1031):590-5.
38. Byrne MHV, Ashcroft J, Alexander L, Wan JCM, Arora A, Brown MEL, et al. COVIDReady2 study protocol: cross-sectional survey of medical student volunteering and education during the COVID-19 pandemic in the United Kingdom. *BMC Med Educ*. 2021;21(1):211.

Figure 1. Participant flow diagram

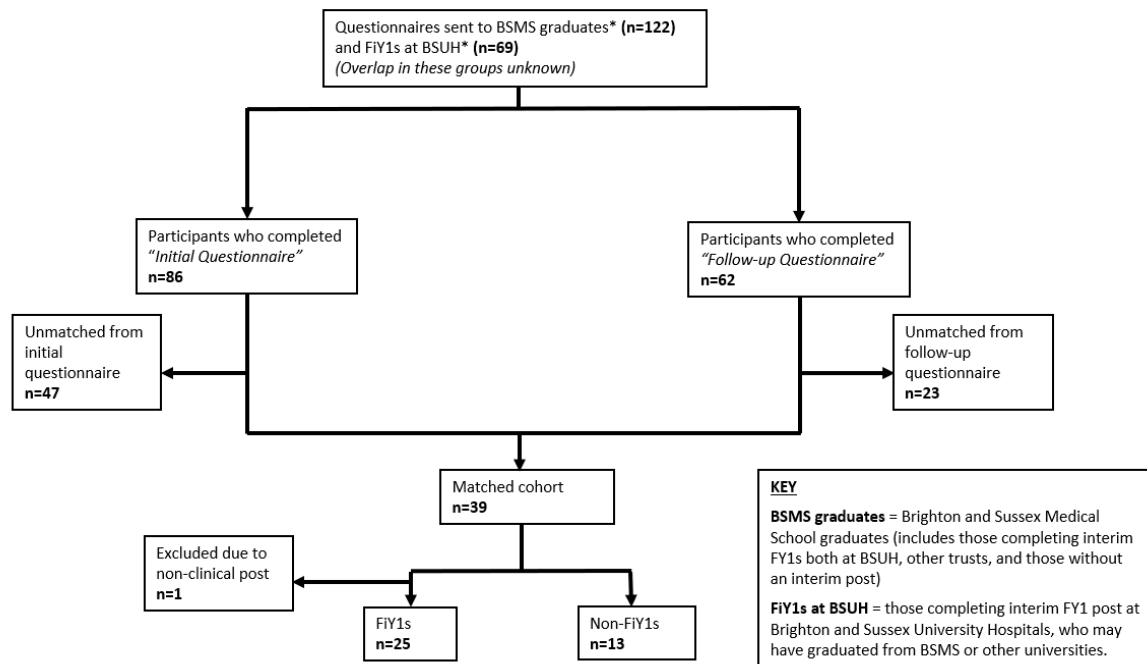

# Appendix 1: Initial Questionnaire Pre-Interim FY1 post

You are being invited to participate in a service improvement project, which aims to review the impact of the interim FY1 placement on confidence when starting FY1 in August. This is being carried out by Dr Cristina Gatti and Dr Katie Parker-Conway, Academic Foundation doctors at Brighton and Sussex University Hospitals.

This will involve completing a questionnaire assessing your confidence in core procedures, skills and knowledge of managing unwell patients, at the beginning and end of your interim placement, to assess if these answers have changed. The questionnaire is short and should take less than 5 minutes. You will be emailed the post-placement questionnaire at the end of your interim FY1 placement.

Your responses will remain anonymous; results may be presented to Brighton and Sussex Medical School (BSMS) to inform future service planning, published in journals and/or presented to medical education forums such as conferences.

If you have any questions, please contact us via email: [cristina.gatti1@nhs.net](mailto:cristina.gatti1@nhs.net) or [kathryn.parker-conway@nhs.net](mailto:kathryn.parker-conway@nhs.net).

Your participation is entirely voluntary. Thank you in advance for your time.

\* Required

1. What gender do you identify with? \*

*Mark only one oval.*

Female

Male

Transgender Female

Transgender Male

Gender variant/Non-conforming

Prefer not to say

Other: \_\_\_\_\_



1 2. What is your age? \*

2  
3 *Mark only one oval.*

4  
5  18-24 years old

6  
7  25-34 years old

8  
9  35-44 years old

10  
11  45 years and over

12  
13  Prefer not to say

14  
15  
16  
17  
18  
19 3. Please specify your ethnicity \*

20  
21 *Mark only one oval.*

22  
23  White (British, Irish, Any other white background)

24  
25  Black / African / Caribbean / Black British

26  
27  Mixed / Multiple ethnic groups

28  
29  Other ethnic group

30  
31  Prefer not to say

32  
33  
34  
35  
36  
37 4. Which medical school did you attend? \*

38  
39  
40  
41 \_\_\_\_\_

42  
43  
44 5. Which NHS Trust and specialty are you working in currently? \*

45  
46  
47  
48 \_\_\_\_\_

49  
50  
51 6. Which NHS Trust and specialty will you be working in from August 2020? \*

52  
53  
54  
55 \_\_\_\_\_

7. I feel confident about starting FY1 in August 2020. \*

Mark only one oval.

- Strongly disagree
- Disagree
- Neutral
- Agree
- Strongly agree

Common  
FY1 Tasks

The following section will review your confidence in completing common tasks usually required of an FY1. Please rate your confidence on a scale of 1-5.

1 = Not confident, 2 = Slightly confident, 3= Somewhat confident, 4 = Moderately confident, 5 = Very confident

8. 1. In using IT systems at Brighton and Sussex University Hospitals, e.g. Medway, Bamboo/Panda, ICE, PACS \*

Mark only one oval.

|                       |                       |                       |                       |                       |
|-----------------------|-----------------------|-----------------------|-----------------------|-----------------------|
| 1                     | 2                     | 3                     | 4                     | 5                     |
| <input type="radio"/> |

9. 2. In writing discharge summaries (TTOs) \*

Mark only one oval.

|                       |                       |                       |                       |                       |
|-----------------------|-----------------------|-----------------------|-----------------------|-----------------------|
| 1                     | 2                     | 3                     | 4                     | 5                     |
| <input type="radio"/> |

10. 3. In making referrals (such as to other specialties, or for investigations) \*

Mark only one oval.

1 2 3 4 5

Five empty ovals for rating 1 to 5.

11. 4. In requesting imaging (including CT scans which require discussion with radiologists) \*

Mark only one oval.

1 2 3 4 5

Five empty ovals for rating 1 to 5.

12. 5. In speaking to relatives of patients \*

Mark only one oval.

1 2 3 4 5

Five empty ovals for rating 1 to 5.

FY1 Core Procedures

The following section will review your confidence in performing the practical skills required to complete FY1 competencies currently. Please rate your confidence on a scale of 1-5.

1 = Not confident, 2 = Slightly confident, 3= Somewhat confident, 4 = Moderately confident, 5 = Very confident

1  
2  
3  
4  
5  
6  
7  
8  
9  
10  
11  
12  
13  
14  
15  
16  
17  
18  
19  
20  
21  
22  
23  
24  
25  
26  
27  
28  
29  
30  
31  
32  
33  
34  
35  
36  
37  
38  
39  
40  
41  
42  
43  
44  
45  
46  
47  
48  
49  
50  
51  
52  
53  
54  
55  
56  
57  
58  
59  
60

13. 1. Performing venepuncture \*

1 = Not confident, 2 = Slightly confident, 3= Somewhat confident, 4 = Moderately confident, 5 = Very confident

Mark only one oval.

|                       |                       |                       |                       |                       |
|-----------------------|-----------------------|-----------------------|-----------------------|-----------------------|
| 1                     | 2                     | 3                     | 4                     | 5                     |
| <input type="radio"/> |

14. 2. Performing IV cannulation \*

1 = Not confident, 2 = Slightly confident, 3= Somewhat confident, 4 = Moderately confident, 5 = Very confident

Mark only one oval.

|                       |                       |                       |                       |                       |
|-----------------------|-----------------------|-----------------------|-----------------------|-----------------------|
| 1                     | 2                     | 3                     | 4                     | 5                     |
| <input type="radio"/> |

15. 3. Preparing and administering IV medications and injections \*

1 = Not confident, 2 = Slightly confident, 3= Somewhat confident, 4 = Moderately confident, 5 = Very confident

Mark only one oval.

|                       |                       |                       |                       |                       |
|-----------------------|-----------------------|-----------------------|-----------------------|-----------------------|
| 1                     | 2                     | 3                     | 4                     | 5                     |
| <input type="radio"/> |

## 16. 4. Performing an arterial puncture in an adult (an ABG) \*

1 = Not confident, 2 = Slightly confident, 3= Somewhat confident, 4 = Moderately confident, 5 = Very confident

Mark only one oval.

1      2      3      4      5

---

          

---

## 17. 5. Taking blood cultures from peripheral sites \*

1 = Not confident, 2 = Slightly confident, 3= Somewhat confident, 4 = Moderately confident, 5 = Very confident

Mark only one oval.

1      2      3      4      5

---

          

---

## 18. 6. Administering an intravenous infusion including the prescription of fluids \*

1 = Not confident, 2 = Slightly confident, 3= Somewhat confident, 4 = Moderately confident, 5 = Very confident

Mark only one oval.

1      2      3      4      5

---

          

---

1  
2  
3  
4  
5  
6  
7  
8  
9  
10  
11  
12  
13  
14  
15  
16  
17  
18  
19  
20  
21  
22  
23  
24  
25  
26  
27  
28  
29  
30  
31  
32  
33  
34  
35  
36  
37  
38  
39  
40  
41  
42  
43  
44  
45  
46  
47  
48  
49  
50  
51  
52  
53  
54  
55  
56  
57  
58  
59  
60

19. 7. Prescribing an intravenous infusion of blood and blood products \*

1 = Not confident, 2 = Slightly confident, 3= Somewhat confident, 4 = Moderately confident, 5 = Very confident

Mark only one oval.

|                       |                       |                       |                       |                       |
|-----------------------|-----------------------|-----------------------|-----------------------|-----------------------|
| 1                     | 2                     | 3                     | 4                     | 5                     |
| <input type="radio"/> |

20. 8. Administering an injection of local anaesthetic to skin \*

1 = Not confident, 2 = Slightly confident, 3= Somewhat confident, 4 = Moderately confident, 5 = Very confident

Mark only one oval.

|                       |                       |                       |                       |                       |
|-----------------------|-----------------------|-----------------------|-----------------------|-----------------------|
| 1                     | 2                     | 3                     | 4                     | 5                     |
| <input type="radio"/> |

21. 9. Administering a subcutaneous injection e.g. Insulin or LMW Heparin \*

1 = Not confident, 2 = Slightly confident, 3= Somewhat confident, 4 = Moderately confident, 5 = Very confident

Mark only one oval.

|                       |                       |                       |                       |                       |
|-----------------------|-----------------------|-----------------------|-----------------------|-----------------------|
| 1                     | 2                     | 3                     | 4                     | 5                     |
| <input type="radio"/> |

## 22. 10. Administering an intramuscular injection \*

1 = Not confident, 2 = Slightly confident, 3= Somewhat confident, 4 = Moderately confident, 5 = Very confident

Mark only one oval.

1 2 3 4 5

---

---

## 23. 11. Performing and interpreting an ECG \*

1 = Not confident, 2 = Slightly confident, 3= Somewhat confident, 4 = Moderately confident, 5 = Very confident

Mark only one oval.

1 2 3 4 5

---

---

## 24. 12. Performing and interpreting peak flow \*

1 = Not confident, 2 = Slightly confident, 3= Somewhat confident, 4 = Moderately confident, 5 = Very confident

Mark only one oval.

1 2 3 4 5

---

---

25. 13. Urethral catheterisation (male)

1 = Not confident, 2 = Slightly confident, 3= Somewhat confident, 4 = Moderately confident, 5 = Very confident

Mark only one oval.

|       |                       |                       |                       |                       |                       |
|-------|-----------------------|-----------------------|-----------------------|-----------------------|-----------------------|
|       | 1                     | 2                     | 3                     | 4                     | 5                     |
| <hr/> |                       |                       |                       |                       |                       |
|       | <input type="radio"/> |
| <hr/> |                       |                       |                       |                       |                       |

26. 14. Urethral catheterisation (female) \*

1 = Not confident, 2 = Slightly confident, 3= Somewhat confident, 4 = Moderately confident, 5 = Very confident

Mark only one oval.

|       |                       |                       |                       |                       |                       |
|-------|-----------------------|-----------------------|-----------------------|-----------------------|-----------------------|
|       | 1                     | 2                     | 3                     | 4                     | 5                     |
| <hr/> |                       |                       |                       |                       |                       |
|       | <input type="radio"/> |
| <hr/> |                       |                       |                       |                       |                       |

27. 15. Performing airway care including using simple adjuncts (e.g. Guedal airway or laryngeal masks) \*

1 = Not confident, 2 = Slightly confident, 3= Somewhat confident, 4 = Moderately confident, 5 = Very confident

Mark only one oval.

|       |                       |                       |                       |                       |                       |
|-------|-----------------------|-----------------------|-----------------------|-----------------------|-----------------------|
|       | 1                     | 2                     | 3                     | 4                     | 5                     |
| <hr/> |                       |                       |                       |                       |                       |
|       | <input type="radio"/> |
| <hr/> |                       |                       |                       |                       |                       |

FY1 Core Competencies

The final section will review your confidence in managing unwell patients as per your requirements to meet the clinical care competencies in the F1 curriculum. Please rate your confidence currently on a scale of 1-5.

1 = Not confident, 2 = Slightly confident, 3= Somewhat confident, 4 = Moderately confident, 5 = Very confident



28. 1. Recognises, assesses and initiates management of the acutely ill patient \*

1 = Not confident, 2 = Slightly confident, 3= Somewhat confident, 4 = Moderately confident, 5 = Very confident

Mark only one oval.

|                       |                       |                       |                       |                       |
|-----------------------|-----------------------|-----------------------|-----------------------|-----------------------|
| 1                     | 2                     | 3                     | 4                     | 5                     |
| <input type="radio"/> |

29. 2. Recognises, assesses and manages patients with long term conditions \*

1 = Not confident, 2 = Slightly confident, 3= Somewhat confident, 4 = Moderately confident, 5 = Very confident

Mark only one oval.

|                       |                       |                       |                       |                       |
|-----------------------|-----------------------|-----------------------|-----------------------|-----------------------|
| 1                     | 2                     | 3                     | 4                     | 5                     |
| <input type="radio"/> |

30. 3. Obtains history, performs clinical examination, formulates differential diagnosis and management plan \*

1 = Not confident, 2 = Slightly confident, 3= Somewhat confident, 4 = Moderately confident, 5 = Very confident

Mark only one oval.

|                       |                       |                       |                       |                       |
|-----------------------|-----------------------|-----------------------|-----------------------|-----------------------|
| 1                     | 2                     | 3                     | 4                     | 5                     |
| <input type="radio"/> |

31. 4. Requests relevant investigations and acts upon results \*

1 = Not confident, 2 = Slightly confident, 3= Somewhat confident, 4 = Moderately confident, 5 = Very confident

Mark only one oval.

|       |                       |                       |                       |                       |                       |
|-------|-----------------------|-----------------------|-----------------------|-----------------------|-----------------------|
|       | 1                     | 2                     | 3                     | 4                     | 5                     |
| <hr/> |                       |                       |                       |                       |                       |
|       | <input type="radio"/> |
| <hr/> |                       |                       |                       |                       |                       |

32. 5. Prescribes safely \*

1 = Not confident, 2 = Slightly confident, 3= Somewhat confident, 4 = Moderately confident, 5 = Very confident

Mark only one oval.

|       |                       |                       |                       |                       |                       |
|-------|-----------------------|-----------------------|-----------------------|-----------------------|-----------------------|
|       | 1                     | 2                     | 3                     | 4                     | 5                     |
| <hr/> |                       |                       |                       |                       |                       |
|       | <input type="radio"/> |
| <hr/> |                       |                       |                       |                       |                       |

33. 6. Performs procedures safely \*

1 = Not confident, 2 = Slightly confident, 3= Somewhat confident, 4 = Moderately confident, 5 = Very confident

Mark only one oval.

|       |                       |                       |                       |                       |                       |
|-------|-----------------------|-----------------------|-----------------------|-----------------------|-----------------------|
|       | 1                     | 2                     | 3                     | 4                     | 5                     |
| <hr/> |                       |                       |                       |                       |                       |
|       | <input type="radio"/> |
| <hr/> |                       |                       |                       |                       |                       |

## 34. 7. Is trained and manages cardiac and respiratory arrest \*

1 = Not confident, 2 = Slightly confident, 3= Somewhat confident, 4 = Moderately confident, 5 = Very confident

Mark only one oval.

1 2 3 4 5

---

    

---

## 35. 8. Demonstrates understanding of the principles of health promotion and illness prevention \*

1 = Not confident, 2 = Slightly confident, 3= Somewhat confident, 4 = Moderately confident, 5 = Very confident

Mark only one oval.

1 2 3 4 5

---

    

---

## 36. 9. Manages palliative and end of life care \*

1 = Not confident, 2 = Slightly confident, 3= Somewhat confident, 4 = Moderately confident, 5 = Very confident

Mark only one oval.

1 2 3 4 5

---

    

---

To Finish

1  
2  
3  
4  
5  
6  
7  
8  
9  
10  
11  
12  
13  
14  
15  
16  
17  
18  
19  
20  
21  
22  
23  
24  
25  
26  
27  
28  
29  
30  
31  
32  
33  
34  
35  
36  
37  
38  
39  
40  
41  
42  
43  
44  
45  
46  
47  
48  
49  
50  
51  
52  
53  
54  
55  
56  
57  
58  
59  
60

37. Any other comments/concerns or areas of improvement you would like to suggest...

---

---

---

---

---

38. Please enter your email address if you are happy to be sent the follow up questionnaire (please ensure this is an email you will have access to in 2 months time).

---

**Thank you very much for your time.**

By clicking 'submit' you are consenting to participating in this improvement project, as described previously. For any more information, please email [crisrina.gatti1@nhs.net](mailto:crisrina.gatti1@nhs.net) or [kathryn.parker-conway@nhs.net](mailto:kathryn.parker-conway@nhs.net).

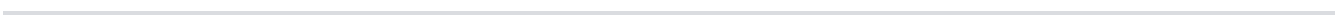

This content is neither created nor endorsed by Google.

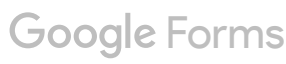

# Appendix 2: Follow-up Questionnaire

## Post-Interim FY1 post

THIS QUESTIONNAIRE IS FOR THOSE STARTING FY1 IN AUGUST 2020, WHO HAVE OR HAVE NOT COMPLETED AN INTERIM FY1 POST.

You are being invited to participate in a service improvement project, which aims to review the impact of the interim FY1 placement on confidence when starting FY1 in August. This is being carried out by Dr Cristina Gatti and Dr Katie Parker-Conway, Academic Foundation doctors at Brighton and Sussex University Hospitals.

This will involve completing a questionnaire assessing your confidence in core procedures, skills and knowledge of managing unwell patients, before starting FY1 in August. If you completed an interim post, it will also include an evaluation of this post. The questionnaire is short and should take less than 5 minutes.

Your responses will remain anonymous; results may be presented to Brighton and Sussex Medical School (BSMS) to inform future service planning, published in journals and/or presented to medical education forums.

If you have any questions, please contact us via email: [cristina.gatti1@nhs.net](mailto:cristina.gatti1@nhs.net) or [kathryn.parker-conway@nhs.net](mailto:kathryn.parker-conway@nhs.net).

Your participation is entirely voluntary.

All those completing the questionnaire will be entered into a prize draw to win a £40 amazon voucher.

Thank you in advance for your time.

\* Required

1 1. What gender do you identify with? \*

2  
3 *Mark only one oval.*

4  
5  Female

6  
7  Male

8  
9  Transgender Female

10  
11  Transgender Male

12  
13  Gender variant/Non-conforming

14  
15  Prefer not to say

16  
17  Other: \_\_\_\_\_

18  
19  
20  
21  
22  
23 2. What is your age? \*

24  
25 *Mark only one oval.*

26  
27  18-24 years old

28  
29  25-34 years old

30  
31  35-44 years old

32  
33  45 years and over

34  
35  Prefer not to say

36  
37  
38  
39  
40  
41 3. Please specify your ethnicity \*

42  
43 *Mark only one oval.*

44  
45  White (British, Irish, Any other white background)

46  
47  Asian / Asian British

48  
49  Black / African / Caribbean / Black British

50  
51  Mixed / Multiple ethnic groups

52  
53  Other ethnic group

54  
55  Prefer not to say

## 4. Which medical school did you attend? \*

Mark only one oval.

- University of Aberdeen
- Anglia Ruskin University
- Aston University
- Barts and The London School of Medicine and Dentistry
- University of Birmingham
- Brighton and Sussex Medical School
- University of Bristol
- University of Buckingham
- University of Cambridge
- Cardiff University
- University of Dundee
- Edge Hill University
- University of Exeter
- University of Glasgow
- Hull York Medical School
- Imperial College London
- Keele University
- Kent and Medway Medical School
- King's College London
- Lancaster University
- University of Leeds
- University of Leicester
- University of Liverpool
- London School of Hygiene and Tropical Medicine
- University of Manchester
- Newcastle University
- Norwich Medical School (University of East Anglia)
- University of Nottingham
- University of Nottingham - Lincoln Medical School

For peer review only - <http://bmjopen.bmj.com/site/about/guidelines.xhtml>

- 1  University of Oxford
- 2  Plymouth University
- 3
- 4  Queen's University Belfast
- 5
- 6  University of Sheffield
- 7
- 8  University of Southampton
- 9
- 10  University of St Andrews
- 11
- 12  St George's, University of London
- 13
- 14  University of Sunderland
- 15
- 16  Swansea University
- 17
- 18  University of Central Lancashire
- 19
- 20  University College London
- 21
- 22  University of Warwick
- 23
- 24  Other

25

26

27

28 5. Which NHS Trust will you be working in from August 2020? \*

29

30 \_\_\_\_\_

31

32

33

34

35 6. Which specialty will you be working in from August 2020? \*

36

37 \_\_\_\_\_

38

39

40

41

42 7. I feel confident about starting FY1 in August 2020. \*

43

44 *Mark only one oval.*

- 45
- 46  Strongly disagree
- 47
- 48  Disagree
- 49
- 50  Neutral
- 51
- 52  Agree
- 53
- 54  Strongly agree
- 55



Common  
FY1 Tasks

The following section will review your confidence in completing common tasks usually required of an FY1. Please rate your confidence on a scale of 1-5.

1 = Not confident, 2 = Slightly confident, 3= Somewhat confident, 4 = Moderately confident, 5 = Very confident

8. 1. In using IT systems at Brighton and Sussex University Hospitals, e.g. Medway, Bamboo/Panda, ICE, PACS \*

1 = Not confident, 2 = Slightly confident, 3= Somewhat confident, 4 = Moderately confident, 5 = Very confident

Mark only one oval.

1      2      3      4      5

---

          

---

9. 2. In writing discharge summaries (TTOs) \*

1 = Not confident, 2 = Slightly confident, 3= Somewhat confident, 4 = Moderately confident, 5 = Very confident

Mark only one oval.

1      2      3      4      5

---

          

---

10. 3. In making referrals (such as to other specialties, or for investigations) \*

1 = Not confident, 2 = Slightly confident, 3= Somewhat confident, 4 = Moderately confident, 5 = Very confident

Mark only one oval.

1      2      3      4      5

---

          

---

11. Please explain your answer to question 3. \*

2  
3  
4  
5  
6  
7  
8  
9  
10  
11  
12

---

---

---

---

---

12. 4. In requesting imaging (including CT scans which require discussion with radiologists) \*

1 = Not confident, 2 = Slightly confident, 3= Somewhat confident, 4 = Moderately confident, 5 = Very confident

Mark only one oval.

1      2      3      4      5

23  
24  
25  
26  
27  
28

---

          

---

13. 5. In speaking to relatives of patients \*

1 = Not confident, 2 = Slightly confident, 3= Somewhat confident, 4 = Moderately confident, 5 = Very confident

Mark only one oval.

39  
40  
41

1      2      3      4      5

42  
43  
44

---

          

---

45  
46  
47  
48  
49  
50  
51  
52

**FY1 Core  
Procedures**

The following section will review your confidence in performing the practical skills required to complete FY1 competencies. Please rate your confidence on a scale of 1-5.

1 = Not confident, 2 = Slightly confident, 3= Somewhat confident, 4 = Moderately confident, 5 = Very confident

14. 1. Performing venepuncture \*

1 = Not confident, 2 = Slightly confident, 3= Somewhat confident, 4 = Moderately confident, 5 = Very confident

Mark only one oval.

|                       |                       |                       |                       |                       |
|-----------------------|-----------------------|-----------------------|-----------------------|-----------------------|
| 1                     | 2                     | 3                     | 4                     | 5                     |
| <input type="radio"/> |

15. 2. Performing IV cannulation \*

1 = Not confident, 2 = Slightly confident, 3= Somewhat confident, 4 = Moderately confident, 5 = Very confident

Mark only one oval.

|                       |                       |                       |                       |                       |
|-----------------------|-----------------------|-----------------------|-----------------------|-----------------------|
| 1                     | 2                     | 3                     | 4                     | 5                     |
| <input type="radio"/> |

16. 3. Preparing and administering IV medications and injections \*

1 = Not confident, 2 = Slightly confident, 3= Somewhat confident, 4 = Moderately confident, 5 = Very confident

Mark only one oval.

|                       |                       |                       |                       |                       |
|-----------------------|-----------------------|-----------------------|-----------------------|-----------------------|
| 1                     | 2                     | 3                     | 4                     | 5                     |
| <input type="radio"/> |

17. 4. Performing an arterial puncture in an adult (an ABG) \*

1 = Not confident, 2 = Slightly confident, 3= Somewhat confident, 4 = Moderately confident, 5 = Very confident

Mark only one oval.

|  |                       |                       |                       |                       |                       |
|--|-----------------------|-----------------------|-----------------------|-----------------------|-----------------------|
|  | 1                     | 2                     | 3                     | 4                     | 5                     |
|  | <input type="radio"/> |

18. 5. Taking blood cultures from peripheral sites \*

1 = Not confident, 2 = Slightly confident, 3= Somewhat confident, 4 = Moderately confident, 5 = Very confident

Mark only one oval.

|  |                       |                       |                       |                       |                       |
|--|-----------------------|-----------------------|-----------------------|-----------------------|-----------------------|
|  | 1                     | 2                     | 3                     | 4                     | 5                     |
|  | <input type="radio"/> |

19. 6. Administering an intravenous infusion including the prescription of fluids \*

1 = Not confident, 2 = Slightly confident, 3= Somewhat confident, 4 = Moderately confident, 5 = Very confident

Mark only one oval.

|  |                       |                       |                       |                       |                       |
|--|-----------------------|-----------------------|-----------------------|-----------------------|-----------------------|
|  | 1                     | 2                     | 3                     | 4                     | 5                     |
|  | <input type="radio"/> |

## 20. 7. Prescribing an intravenous infusion of blood and blood products \*

1 = Not confident, 2 = Slightly confident, 3= Somewhat confident, 4 = Moderately confident, 5 = Very confident

Mark only one oval.

1      2      3      4      5

---

          

---

## 21. 8. Administering an injection of local anaesthetic to skin \*

1 = Not confident, 2 = Slightly confident, 3= Somewhat confident, 4 = Moderately confident, 5 = Very confident

Mark only one oval.

1      2      3      4      5

---

          

---

## 22. 9. Administering a subcutaneous injection e.g. Insulin or LMW Heparin \*

1 = Not confident, 2 = Slightly confident, 3= Somewhat confident, 4 = Moderately confident, 5 = Very confident

Mark only one oval.

1      2      3      4      5

---

          

---

23. 10. Administering an intramuscular injection \*

1 = Not confident, 2 = Slightly confident, 3= Somewhat confident, 4 = Moderately confident, 5 = Very confident

Mark only one oval.

|       |                       |                       |                       |                       |                       |
|-------|-----------------------|-----------------------|-----------------------|-----------------------|-----------------------|
|       | 1                     | 2                     | 3                     | 4                     | 5                     |
| <hr/> |                       |                       |                       |                       |                       |
|       | <input type="radio"/> |
| <hr/> |                       |                       |                       |                       |                       |

24. 11. Performing and interpreting an ECG \*

1 = Not confident, 2 = Slightly confident, 3= Somewhat confident, 4 = Moderately confident, 5 = Very confident

Mark only one oval.

|       |                       |                       |                       |                       |                       |
|-------|-----------------------|-----------------------|-----------------------|-----------------------|-----------------------|
|       | 1                     | 2                     | 3                     | 4                     | 5                     |
| <hr/> |                       |                       |                       |                       |                       |
|       | <input type="radio"/> |
| <hr/> |                       |                       |                       |                       |                       |

25. 12. Performing and interpreting peak flow \*

1 = Not confident, 2 = Slightly confident, 3= Somewhat confident, 4 = Moderately confident, 5 = Very confident

Mark only one oval.

|       |                       |                       |                       |                       |                       |
|-------|-----------------------|-----------------------|-----------------------|-----------------------|-----------------------|
|       | 1                     | 2                     | 3                     | 4                     | 5                     |
| <hr/> |                       |                       |                       |                       |                       |
|       | <input type="radio"/> |
| <hr/> |                       |                       |                       |                       |                       |

26. 13. Urethral catheterisation (male) \*

1 = Not confident, 2 = Slightly confident, 3= Somewhat confident, 4 = Moderately confident, 5 = Very confident

Mark only one oval.

|                       |                       |                       |                       |                       |
|-----------------------|-----------------------|-----------------------|-----------------------|-----------------------|
| 1                     | 2                     | 3                     | 4                     | 5                     |
| <input type="radio"/> |

27. 14. Urethral catheterisation (female) \*

1 = Not confident, 2 = Slightly confident, 3= Somewhat confident, 4 = Moderately confident, 5 = Very confident

Mark only one oval.

|                       |                       |                       |                       |                       |
|-----------------------|-----------------------|-----------------------|-----------------------|-----------------------|
| 1                     | 2                     | 3                     | 4                     | 5                     |
| <input type="radio"/> |

28. 15. Performing airway care including using simple adjuncts (e.g. Guedal airway or laryngeal masks) \*

1 = Not confident, 2 = Slightly confident, 3= Somewhat confident, 4 = Moderately confident, 5 = Very confident

Mark only one oval.

|                       |                       |                       |                       |                       |
|-----------------------|-----------------------|-----------------------|-----------------------|-----------------------|
| 1                     | 2                     | 3                     | 4                     | 5                     |
| <input type="radio"/> |

FY1 Core Competencies

The final section will review your confidence in managing unwell patients as per your requirements to meet the clinical care competencies in the F1 curriculum. Please rate your confidence on a scale of 1-5.

1 = Not confident, 2 = Slightly confident, 3= Somewhat confident, 4 = Moderately confident, 5 = Very confident

29. 1. Recognises, assesses and initiates management of the acutely ill patient \*

1 = Not confident, 2 = Slightly confident, 3= Somewhat confident, 4 = Moderately confident, 5 = Very confident

Mark only one oval.

|                       |                       |                       |                       |                       |
|-----------------------|-----------------------|-----------------------|-----------------------|-----------------------|
| 1                     | 2                     | 3                     | 4                     | 5                     |
| <input type="radio"/> |

30. 2. Recognises, assesses and manages patients with long term conditions \*

1 = Not confident, 2 = Slightly confident, 3= Somewhat confident, 4 = Moderately confident, 5 = Very confident

Mark only one oval.

|                       |                       |                       |                       |                       |
|-----------------------|-----------------------|-----------------------|-----------------------|-----------------------|
| 1                     | 2                     | 3                     | 4                     | 5                     |
| <input type="radio"/> |

31. 3. Obtains history, performs clinical examination, formulates differential diagnosis and management plan \*

1 = Not confident, 2 = Slightly confident, 3= Somewhat confident, 4 = Moderately confident, 5 = Very confident

Mark only one oval.

|                       |                       |                       |                       |                       |
|-----------------------|-----------------------|-----------------------|-----------------------|-----------------------|
| 1                     | 2                     | 3                     | 4                     | 5                     |
| <input type="radio"/> |



32. 4. Requests relevant investigations and acts upon results \*

1 = Not confident, 2 = Slightly confident, 3= Somewhat confident, 4 = Moderately confident, 5 = Very confident

Mark only one oval.

|                       |                       |                       |                       |                       |
|-----------------------|-----------------------|-----------------------|-----------------------|-----------------------|
| 1                     | 2                     | 3                     | 4                     | 5                     |
| <input type="radio"/> |

33. 5. Prescribes safely \*

1 = Not confident, 2 = Slightly confident, 3= Somewhat confident, 4 = Moderately confident, 5 = Very confident

Mark only one oval.

|                       |                       |                       |                       |                       |
|-----------------------|-----------------------|-----------------------|-----------------------|-----------------------|
| 1                     | 2                     | 3                     | 4                     | 5                     |
| <input type="radio"/> |

34. 6. Performs procedures safely \*

1 = Not confident, 2 = Slightly confident, 3= Somewhat confident, 4 = Moderately confident, 5 = Very confident

Mark only one oval.

|                       |                       |                       |                       |                       |
|-----------------------|-----------------------|-----------------------|-----------------------|-----------------------|
| 1                     | 2                     | 3                     | 4                     | 5                     |
| <input type="radio"/> |

35. 7. Is trained and manages cardiac and respiratory arrest \*

1 = Not confident, 2 = Slightly confident, 3= Somewhat confident, 4 = Moderately confident, 5 = Very confident

Mark only one oval.

|                       |                       |                       |                       |                       |
|-----------------------|-----------------------|-----------------------|-----------------------|-----------------------|
| 1                     | 2                     | 3                     | 4                     | 5                     |
| <input type="radio"/> |

36. 8. Demonstrates understanding of the principles of health promotion and illness prevention \*

1 = Not confident, 2 = Slightly confident, 3= Somewhat confident, 4 = Moderately confident, 5 = Very confident

Mark only one oval.

|                       |                       |                       |                       |                       |
|-----------------------|-----------------------|-----------------------|-----------------------|-----------------------|
| 1                     | 2                     | 3                     | 4                     | 5                     |
| <input type="radio"/> |

37. 9. Manages palliative and end of life care \*

1 = Not confident, 2 = Slightly confident, 3= Somewhat confident, 4 = Moderately confident, 5 = Very confident

Mark only one oval.

|                       |                       |                       |                       |                       |
|-----------------------|-----------------------|-----------------------|-----------------------|-----------------------|
| 1                     | 2                     | 3                     | 4                     | 5                     |
| <input type="radio"/> |

38. Did you have an Interim FY1 post? \*

Mark only one oval.

Yes      Skip to question 39

No      Skip to question 59

## Interim FY1 post

39. In which NHS Trust did you complete your Interim FY1 post? \*

---

40. In which specialty did you complete your Interim FY1 post? \*

---

41. How many weeks long was your interim FY1 post (to nearest week)? \*

*Mark only one oval.*

1

2

3

4

5

6

7

8

9

42. Did you have an assistantship placement during medical school? \*

A student assistantship is a placement usually in the final year of medical school in which a student is on the same ward and/or team acting as assistant to a junior doctor, with defined duties under appropriate supervision. They should be integrated into the team and participate in activities similar to those of a newly qualified doctor.

*Mark only one oval.*

Yes    *Skip to question 43*

Unsure    *Skip to question 45*

No    *Skip to question 45*

1 43. How did the assistantship compare to the Interim FY1 post, in terms of improving  
2 your skills, knowledge and confidence for starting FY1? \*

3  
4  
5 *Mark only one oval.*

- 6  
7  Interim post MORE beneficial than assistantship  
8  
9  Interim post EQUALLY beneficial to assistantship  
10  
11  Interim post LESS beneficial than assistantship  
12  
13  
14  
15

16 44. Please explain your answer.  
17  
18  
19  
20  
21

22 *Skip to question 45*  
23  
24

25 45. Did you do any on calls as part of your Interim FY1 post? Tick all that apply. \*  
26  
27

28 *Check all that apply.*

- 29  
30  Weekend day shifts  
31  Late shifts (all or part of the scheduled shift is after 5pm)  
32  Night shifts  
33  I didn't do any on call shifts  
34  
35  
36  
37  
38

39 46. Did you feel you were part of the multi-disciplinary team (MDT) during your Interim  
40 FY1 post? \*  
41

42 The multi-disciplinary team is a group of professionals from one or more clinical disciplines (e.g. nurses,  
43 physiotherapists, occupational therapists, dietitians, speech and language therapists etc.) who work  
44 together to make decisions regarding patient management.  
45

46  
47 *Mark only one oval.*

- 48  
49  Always  
50  
51  Mostly  
52  
53  Sometimes  
54  
55  Rarely  
56  
57  Never  
58  
59

1 47. Do you feel you were treated as a doctor during your Interim FY1 post (as opposed  
2 to a student)? \*

3  
4 *Mark only one oval.*

5  
6  
7  Always

8  
9  Mostly

10  
11  Sometimes

12  
13  Rarely

14  
15  Never

16  
17  
18  
19  
20 48. Did you feel that you knew what your role was within the team? \*

21  
22 *Mark only one oval.*

23  
24  
25  Always

26  
27  Mostly

28  
29  Sometimes

30  
31  Rarely

32  
33  Never

34  
35  
36  
37  
38 49. Did you feel as though you were appropriately supervised? \*

39  
40 *Mark only one oval.*

41  
42  
43  Always

44  
45  Mostly

46  
47  Sometimes

48  
49  Rarely

50  
51  Never

1 50. Did you feel you had clear learning outcomes for the Interim FY1 post? \*

2  
3 *Mark only one oval.*

4  
5  Yes

6  
7  Somewhat

8  
9  No

10  
11  
12  
13  
14  
15 51. Do you think your Interim F1 post has been broadly similar to that of your  
16 colleagues? \*

17  
18  
19 *Mark only one oval.*

20  
21  Yes

22  
23  Somewhat

24  
25  No

26  
27  
28  
29 *Skip to question 52*

30  
31  
32  
33 52. Do you feel that the Interim FY1 post has improved your competence? \*

34  
35 *Mark only one oval.*

36  
37  Yes

38  
39  Somewhat

40  
41  No

42  
43  
44  
45  
46  
47 53. Has the Interim FY1 post reduced your anxiety about starting FY1? \*

48  
49 *Mark only one oval.*

50  
51  Yes

52  
53  Somewhat

54  
55  No

1  
2  
3  
4  
5  
6  
7  
8  
9  
10  
11  
12  
13  
14  
15  
16  
17  
18  
19  
20  
21  
22  
23  
24  
25  
26  
27  
28  
29  
30  
31  
32  
33  
34  
35  
36  
37  
38  
39  
40  
41  
42  
43  
44  
45  
46  
47  
48  
49  
50  
51  
52  
53  
54  
55  
56  
57  
58  
59  
60

54. What was most useful about the Interim FY1 post? \*

---

---

---

---

---

55. Were there any disadvantages to having an Interim FY1 post? \*

---

---

---

---

---

56. Can you suggest anything to improve the Interim FY1 post? \*

---

---

---

---

---

57. Would you recommend the Interim FY1 post for next year? \*

*Mark only one oval.*

Yes

No

1 58. Would you have done this Interim FY1 post unpaid as part of the medical school  
2 curriculum? \*

3  
4 *Mark only one oval.*

5  
6  
7  Yes

8  
9  Maybe

10  
11  No

12  
13  
14  
15  
16 *Skip to question 61*

17  
18  
19 59. Do you wish you had completed an Interim FY1 post? \*

20  
21 *Mark only one oval.*

22  
23  
24  Yes

25  
26  Somewhat

27  
28  No

29  
30  
31  
32  
33 60. Please explain your answer. \*

34  
35  
36 \_\_\_\_\_

37  
38  
39 *Skip to question 61*

40  
41 **To Finish**

42  
43  
44  
45 61. Please include any further comments you would like to make.

46  
47  
48  
49 \_\_\_\_\_  
50 \_\_\_\_\_  
51 \_\_\_\_\_  
52 \_\_\_\_\_  
53 \_\_\_\_\_  
54 \_\_\_\_\_  
55 \_\_\_\_\_  
56 \_\_\_\_\_



1 62. Please enter your email address if you would like to be included in the prize draw.  
2  
3  
4 \_\_\_\_\_  
5  
6

7  
8 63. Are you happy to be sent a further follow up questionnaire?  
9

10 Please ensure you will have access to the email address you entered above in 2 months time.  
11

12 *Mark only one oval.*  
13

14  Yes  
15

16  No  
17  
18  
19  
20

21 **Thank you very much for your time.**  
22

23 By clicking 'submit' you are consenting to participating in this improvement project, as described previously. For  
24 any more information, please email [cristina.gatti1@nhs.net](mailto:cristina.gatti1@nhs.net) or [kathryn.parker-conway@nhs.net](mailto:kathryn.parker-conway@nhs.net).  
25  
26  
27

---

28  
29  
30 This content is neither created nor endorsed by Google.  
31

32  
33 Google Forms  
34  
35  
36  
37  
38  
39  
40  
41  
42  
43  
44  
45  
46  
47  
48  
49  
50  
51  
52  
53  
54  
55  
56  
57  
58  
59  
60

## Research checklist:

Checklist of standards for reporting quality improvement standards - Revised Standards for Quality Improvement Reporting Excellence (SQIURE 2.0)

| Reporting item(s)                      | Page number(s) on which item(s) reported |
|----------------------------------------|------------------------------------------|
| <b>Title and Abstract</b>              |                                          |
| <b>1. Title</b>                        | <b>1</b>                                 |
| <b>2. Abstract</b>                     | <b>2</b>                                 |
| <b>Introduction</b>                    |                                          |
| <b>3. Problem Description</b>          | <b>3-5</b>                               |
| <b>4. Available knowledge</b>          | <b>3-5</b>                               |
| <b>5. Rationale</b>                    | <b>3-5</b>                               |
| <b>6. Specific Aims</b>                | <b>5</b>                                 |
| <b>Methods</b>                         |                                          |
| <b>7. Context</b>                      | <b>5</b>                                 |
| <b>8. Intervention(s)</b>              | <b>5-7</b>                               |
| <b>9. Study of the Intervention(s)</b> | <b>5-7</b>                               |
| <b>10. Measures</b>                    | <b>5-7</b>                               |
| <b>11. Analysis</b>                    | <b>7-8</b>                               |
| <b>12. Ethical Considerations</b>      | <b>5</b>                                 |
| <b>Results</b>                         |                                          |
| <b>13. Results</b>                     | <b>8-12</b>                              |
| <b>Discussion</b>                      |                                          |
| <b>14. Summary</b>                     | <b>12-13</b>                             |
| <b>15. Interpretation</b>              | <b>13-16</b>                             |
| <b>16. Limitations</b>                 | <b>15</b>                                |
| <b>17. Conclusions</b>                 | <b>16</b>                                |
| <b>Other information</b>               |                                          |
| <b>18. Funding</b>                     | <b>17</b>                                |
