# Supplementary material for: COVID-19 pandemic interim Foundation Year 1 post and confidence in core skills and competencies: a longitudinal survey
Source: PubMed Central journal article supplement — BMJ Open. 2022 Nov 2;12(11):e059487. doi: 10.1136/bmjopen-2021-059487 (PMC9638744; doi:10.1136/bmjopen-2021-059487), 2022-11-02
Supplement: bmjopen-2021-059487supp001.pdf [file bmjopen-2021-059487supp001.pdf]

8/18/2021

Appendix 1: Initial Questionnaire Pre-Interim FY1 post

# Appendix 1: Initial Questionnaire Pre-Interim FY1 post

You are being invited to participate in a service improvement project, which aims to review the impact of the interim FY1 placement on confidence when starting FY1 in August. This is being carried out by Dr Cristina Gatti and Dr Katie Parker-Conway, Academic Foundation doctors at Brighton and Sussex University Hospitals.

This will involve completing a questionnaire assessing your confidence in core procedures, skills and knowledge of managing unwell patients, at the beginning and end of your interim placement, to assess if these answers have changed. The questionnaire is short and should take less than 5 minutes. You will be emailed the post-placement questionnaire at the end of your interim FY1 placement.

Your responses will remain anonymous; results may be presented to Brighton and Sussex Medical School (BSMS) to inform future service planning, published in journals and/or presented to medical education forums such as conferences.

If you have any questions, please contact us via email: [cristina.gatti1@nhs.net](mailto:cristina.gatti1@nhs.net) or [kathryn.parker-conway@nhs.net](mailto:kathryn.parker-conway@nhs.net).

Your participation is entirely voluntary. Thank you in advance for your time.

\* Required

## 1. What gender do you identify with? \*

*Mark only one oval.*

- Female
- Male
- Transgender Female
- Transgender Male
- Gender variant/Non-conforming
- Prefer not to say
- Other: \_\_\_\_\_

8/18/2021

Appendix 1: Initial Questionnaire Pre-Interim FY1 post

2. What is your age? \*

*Mark only one oval.*

- 18-24 years old
- 25-34 years old
- 35-44 years old
- 45 years and over
- Prefer not to say

3. Please specify your ethnicity \*

*Mark only one oval.*

- White (British, Irish, Any other white background)
- Black / African / Caribbean / Black British
- Mixed / Multiple ethnic groups
- Other ethnic group
- Prefer not to say

4. Which medical school did you attend? \*

---

5. Which NHS Trust and specialty are you working in currently? \*

---

6. Which NHS Trust and specialty will you be working in from August 2020? \*

---

8/18/2021

Appendix 1: Initial Questionnaire Pre-Interim FY1 post

7. I feel confident about starting FY1 in August 2020. \*

Mark only one oval.

- Strongly disagree
- Disagree
- Neutral
- Agree
- Strongly agree

Common  
FY1 Tasks

The following section will review your confidence in completing common tasks usually required of an FY1. Please rate your confidence on a scale of 1-5.

1 = Not confident, 2 = Slightly confident, 3= Somewhat confident, 4 = Moderately confident, 5 = Very confident

8. 1. In using IT systems at Brighton and Sussex University Hospitals, e.g. Medway, Bamboo/Panda, ICE, PACS \*

Mark only one oval.

|                       |                       |                       |                       |                       |
|-----------------------|-----------------------|-----------------------|-----------------------|-----------------------|
| 1                     | 2                     | 3                     | 4                     | 5                     |
| <input type="radio"/> |

9. 2. In writing discharge summaries (TTOs) \*

Mark only one oval.

|                       |                       |                       |                       |                       |
|-----------------------|-----------------------|-----------------------|-----------------------|-----------------------|
| 1                     | 2                     | 3                     | 4                     | 5                     |
| <input type="radio"/> |

8/18/2021

Appendix 1: Initial Questionnaire Pre-Interim FY1 post

10. 3. In making referrals (such as to other specialties, or for investigations) \*

Mark only one oval.

|                       |                       |                       |                       |                       |
|-----------------------|-----------------------|-----------------------|-----------------------|-----------------------|
| 1                     | 2                     | 3                     | 4                     | 5                     |
| <input type="radio"/> |

11. 4. In requesting imaging (including CT scans which require discussion with radiologists) \*

Mark only one oval.

|                       |                       |                       |                       |                       |
|-----------------------|-----------------------|-----------------------|-----------------------|-----------------------|
| 1                     | 2                     | 3                     | 4                     | 5                     |
| <input type="radio"/> |

12. 5. In speaking to relatives of patients \*

Mark only one oval.

|                       |                       |                       |                       |                       |
|-----------------------|-----------------------|-----------------------|-----------------------|-----------------------|
| 1                     | 2                     | 3                     | 4                     | 5                     |
| <input type="radio"/> |

**FY1 Core  
Procedures**

The following section will review your confidence in performing the practical skills required to complete FY1 competencies currently. Please rate your confidence on a scale of 1-5.

1 = Not confident, 2 = Slightly confident, 3= Somewhat confident, 4 = Moderately confident, 5 = Very confident

8/18/2021

Appendix 1: Initial Questionnaire Pre-Interim FY1 post

## 13. 1. Performing venepuncture \*

1 = Not confident, 2 = Slightly confident, 3= Somewhat confident, 4 = Moderately confident, 5 = Very confident

Mark only one oval.

| 1                     | 2                     | 3                     | 4                     | 5                     |
|-----------------------|-----------------------|-----------------------|-----------------------|-----------------------|
| <input type="radio"/> |

## 14. 2. Performing IV cannulation \*

1 = Not confident, 2 = Slightly confident, 3= Somewhat confident, 4 = Moderately confident, 5 = Very confident

Mark only one oval.

| 1                     | 2                     | 3                     | 4                     | 5                     |
|-----------------------|-----------------------|-----------------------|-----------------------|-----------------------|
| <input type="radio"/> |

## 15. 3. Preparing and administering IV medications and injections \*

1 = Not confident, 2 = Slightly confident, 3= Somewhat confident, 4 = Moderately confident, 5 = Very confident

Mark only one oval.

| 1                     | 2                     | 3                     | 4                     | 5                     |
|-----------------------|-----------------------|-----------------------|-----------------------|-----------------------|
| <input type="radio"/> |

8/18/2021

Appendix 1: Initial Questionnaire Pre-Interim FY1 post

## 16. 4. Performing an arterial puncture in an adult (an ABG) \*

1 = Not confident, 2 = Slightly confident, 3= Somewhat confident, 4 = Moderately confident, 5 = Very confident

Mark only one oval.

| 1                     | 2                     | 3                     | 4                     | 5                     |
|-----------------------|-----------------------|-----------------------|-----------------------|-----------------------|
| <input type="radio"/> |

## 17. 5. Taking blood cultures from peripheral sites \*

1 = Not confident, 2 = Slightly confident, 3= Somewhat confident, 4 = Moderately confident, 5 = Very confident

Mark only one oval.

| 1                     | 2                     | 3                     | 4                     | 5                     |
|-----------------------|-----------------------|-----------------------|-----------------------|-----------------------|
| <input type="radio"/> |

## 18. 6. Administering an intravenous infusion including the prescription of fluids \*

1 = Not confident, 2 = Slightly confident, 3= Somewhat confident, 4 = Moderately confident, 5 = Very confident

Mark only one oval.

| 1                     | 2                     | 3                     | 4                     | 5                     |
|-----------------------|-----------------------|-----------------------|-----------------------|-----------------------|
| <input type="radio"/> |

8/18/2021

Appendix 1: Initial Questionnaire Pre-Interim FY1 post

## 19. 7. Prescribing an intravenous infusion of blood and blood products \*

1 = Not confident, 2 = Slightly confident, 3= Somewhat confident, 4 = Moderately confident, 5 = Very confident

Mark only one oval.

|                       |                       |                       |                       |                       |
|-----------------------|-----------------------|-----------------------|-----------------------|-----------------------|
| 1                     | 2                     | 3                     | 4                     | 5                     |
| <input type="radio"/> |

## 20. 8. Administering an injection of local anaesthetic to skin \*

1 = Not confident, 2 = Slightly confident, 3= Somewhat confident, 4 = Moderately confident, 5 = Very confident

Mark only one oval.

|                       |                       |                       |                       |                       |
|-----------------------|-----------------------|-----------------------|-----------------------|-----------------------|
| 1                     | 2                     | 3                     | 4                     | 5                     |
| <input type="radio"/> |

## 21. 9. Administering a subcutaneous injection e.g. Insulin or LMW Heparin \*

1 = Not confident, 2 = Slightly confident, 3= Somewhat confident, 4 = Moderately confident, 5 = Very confident

Mark only one oval.

|                       |                       |                       |                       |                       |
|-----------------------|-----------------------|-----------------------|-----------------------|-----------------------|
| 1                     | 2                     | 3                     | 4                     | 5                     |
| <input type="radio"/> |

8/18/2021

Appendix 1: Initial Questionnaire Pre-Interim FY1 post

## 22. 10. Administering an intramuscular injection \*

1 = Not confident, 2 = Slightly confident, 3= Somewhat confident, 4 = Moderately confident, 5 = Very confident

Mark only one oval.

| 1                     | 2                     | 3                     | 4                     | 5                     |
|-----------------------|-----------------------|-----------------------|-----------------------|-----------------------|
| <input type="radio"/> |

## 23. 11. Performing and interpreting an ECG \*

1 = Not confident, 2 = Slightly confident, 3= Somewhat confident, 4 = Moderately confident, 5 = Very confident

Mark only one oval.

| 1                     | 2                     | 3                     | 4                     | 5                     |
|-----------------------|-----------------------|-----------------------|-----------------------|-----------------------|
| <input type="radio"/> |

## 24. 12. Performing and interpreting peak flow \*

1 = Not confident, 2 = Slightly confident, 3= Somewhat confident, 4 = Moderately confident, 5 = Very confident

Mark only one oval.

| 1                     | 2                     | 3                     | 4                     | 5                     |
|-----------------------|-----------------------|-----------------------|-----------------------|-----------------------|
| <input type="radio"/> |



8/18/2021

Appendix 1: Initial Questionnaire Pre-Interim FY1 post

## 25. 13. Urethral catheterisation (male)

1 = Not confident, 2 = Slightly confident, 3= Somewhat confident, 4 = Moderately confident, 5 = Very confident

Mark only one oval.

|                       |                       |                       |                       |                       |
|-----------------------|-----------------------|-----------------------|-----------------------|-----------------------|
| 1                     | 2                     | 3                     | 4                     | 5                     |
| <input type="radio"/> |

## 26. 14. Urethral catheterisation (female) \*

1 = Not confident, 2 = Slightly confident, 3= Somewhat confident, 4 = Moderately confident, 5 = Very confident

Mark only one oval.

|                       |                       |                       |                       |                       |
|-----------------------|-----------------------|-----------------------|-----------------------|-----------------------|
| 1                     | 2                     | 3                     | 4                     | 5                     |
| <input type="radio"/> |

## 27. 15. Performing airway care including using simple adjuncts (e.g. Guedal airway or laryngeal masks) \*

1 = Not confident, 2 = Slightly confident, 3= Somewhat confident, 4 = Moderately confident, 5 = Very confident

Mark only one oval.

|                       |                       |                       |                       |                       |
|-----------------------|-----------------------|-----------------------|-----------------------|-----------------------|
| 1                     | 2                     | 3                     | 4                     | 5                     |
| <input type="radio"/> |

FY1 Core  
Competencies

The final section will review your confidence in managing unwell patients as per your requirements to meet the clinical care competencies in the F1 curriculum. Please rate your confidence currently on a scale of 1-5.

1 = Not confident, 2 = Slightly confident, 3= Somewhat confident, 4 = Moderately confident, 5 = Very confident

8/18/2021

Appendix 1: Initial Questionnaire Pre-Interim FY1 post

## 28. 1. Recognises, assesses and initiates management of the acutely ill patient \*

1 = Not confident, 2 = Slightly confident, 3 = Somewhat confident, 4 = Moderately confident, 5 = Very confident

Mark only one oval.

| 1                     | 2                     | 3                     | 4                     | 5                     |
|-----------------------|-----------------------|-----------------------|-----------------------|-----------------------|
| <input type="radio"/> |

## 29. 2. Recognises, assesses and manages patients with long term conditions \*

1 = Not confident, 2 = Slightly confident, 3 = Somewhat confident, 4 = Moderately confident, 5 = Very confident

Mark only one oval.

| 1                     | 2                     | 3                     | 4                     | 5                     |
|-----------------------|-----------------------|-----------------------|-----------------------|-----------------------|
| <input type="radio"/> |

## 30. 3. Obtains history, performs clinical examination, formulates differential diagnosis and management plan \*

1 = Not confident, 2 = Slightly confident, 3 = Somewhat confident, 4 = Moderately confident, 5 = Very confident

Mark only one oval.

| 1                     | 2                     | 3                     | 4                     | 5                     |
|-----------------------|-----------------------|-----------------------|-----------------------|-----------------------|
| <input type="radio"/> |

8/18/2021

Appendix 1: Initial Questionnaire Pre-Interim FY1 post

## 31. 4. Requests relevant investigations and acts upon results \*

1 = Not confident, 2 = Slightly confident, 3= Somewhat confident, 4 = Moderately confident, 5 = Very confident

Mark only one oval.

| 1                     | 2                     | 3                     | 4                     | 5                     |
|-----------------------|-----------------------|-----------------------|-----------------------|-----------------------|
| <input type="radio"/> |

## 32. 5. Prescribes safely \*

1 = Not confident, 2 = Slightly confident, 3= Somewhat confident, 4 = Moderately confident, 5 = Very confident

Mark only one oval.

| 1                     | 2                     | 3                     | 4                     | 5                     |
|-----------------------|-----------------------|-----------------------|-----------------------|-----------------------|
| <input type="radio"/> |

## 33. 6. Performs procedures safely \*

1 = Not confident, 2 = Slightly confident, 3= Somewhat confident, 4 = Moderately confident, 5 = Very confident

Mark only one oval.

| 1                     | 2                     | 3                     | 4                     | 5                     |
|-----------------------|-----------------------|-----------------------|-----------------------|-----------------------|
| <input type="radio"/> |

8/18/2021

Appendix 1: Initial Questionnaire Pre-Interim FY1 post

## 34. 7. Is trained and manages cardiac and respiratory arrest \*

1 = Not confident, 2 = Slightly confident, 3= Somewhat confident, 4 = Moderately confident, 5 = Very confident

Mark only one oval.

|                       |                       |                       |                       |                       |
|-----------------------|-----------------------|-----------------------|-----------------------|-----------------------|
| 1                     | 2                     | 3                     | 4                     | 5                     |
| <input type="radio"/> |

## 35. 8. Demonstrates understanding of the principles of health promotion and illness prevention \*

1 = Not confident, 2 = Slightly confident, 3= Somewhat confident, 4 = Moderately confident, 5 = Very confident

Mark only one oval.

|                       |                       |                       |                       |                       |
|-----------------------|-----------------------|-----------------------|-----------------------|-----------------------|
| 1                     | 2                     | 3                     | 4                     | 5                     |
| <input type="radio"/> |

## 36. 9. Manages palliative and end of life care \*

1 = Not confident, 2 = Slightly confident, 3= Somewhat confident, 4 = Moderately confident, 5 = Very confident

Mark only one oval.

|                       |                       |                       |                       |                       |
|-----------------------|-----------------------|-----------------------|-----------------------|-----------------------|
| 1                     | 2                     | 3                     | 4                     | 5                     |
| <input type="radio"/> |

To Finish

8/18/2021

Appendix 1: Initial Questionnaire Pre-Interim FY1 post

37. Any other comments/concerns or areas of improvement you would like to suggest...

---

---

---

---

---

38. Please enter your email address if you are happy to be sent the follow up questionnaire (please ensure this is an email you will have access to in 2 months time).

---

**Thank you very much for your time.**

By clicking 'submit' you are consenting to participating in this improvement project, as described previously. For any more information, please email [cristina.gatti1@nhs.net](mailto:cristina.gatti1@nhs.net) or [kathryn.parker-conway@nhs.net](mailto:kathryn.parker-conway@nhs.net).

---

This content is neither created nor endorsed by Google.

Google Forms
