# Supplementary material for: COVID-19 pandemic interim Foundation Year 1 post and confidence in core skills and competencies: a longitudinal survey
Source: PubMed Central journal article supplement — BMJ Open. 2022 Nov 2;12(11):e059487. doi: 10.1136/bmjopen-2021-059487 (PMC9638744; doi:10.1136/bmjopen-2021-059487), 2022-11-02
Supplement: bmjopen-2021-059487supp002.pdf [file bmjopen-2021-059487supp002.pdf]

8/18/2021

Appendix 2: Follow-up Questionnaire Post-Interim FY1 post

## Appendix 2: Follow-up Questionnaire Post-Interim FY1 post

THIS QUESTIONNAIRE IS FOR THOSE STARTING FY1 IN AUGUST 2020, WHO HAVE OR HAVE NOT COMPLETED AN INTERIM FY1 POST.

You are being invited to participate in a service improvement project, which aims to review the impact of the interim FY1 placement on confidence when starting FY1 in August. This is being carried out by Dr Cristina Gatti and Dr Katie Parker-Conway, Academic Foundation doctors at Brighton and Sussex University Hospitals.

This will involve completing a questionnaire assessing your confidence in core procedures, skills and knowledge of managing unwell patients, before starting FY1 in August. If you completed an interim post, it will also include an evaluation of this post. The questionnaire is short and should take less than 5 minutes.

Your responses will remain anonymous; results may be presented to Brighton and Sussex Medical School (BSMS) to inform future service planning, published in journals and/or presented to medical education forums.

If you have any questions, please contact us via email: [cristina.gatti1@nhs.net](mailto:cristina.gatti1@nhs.net) or [kathryn.parker-conway@nhs.net](mailto:kathryn.parker-conway@nhs.net).

Your participation is entirely voluntary.

All those completing the questionnaire will be entered into a prize draw to win a £40 amazon voucher.

Thank you in advance for your time.

\* Required

8/18/2021

Appendix 2: Follow-up Questionnaire Post-Interim FY1 post

## 1. What gender do you identify with? \*

*Mark only one oval.*

- Female
- Male
- Transgender Female
- Transgender Male
- Gender variant/Non-conforming
- Prefer not to say
- Other: \_\_\_\_\_

## 2. What is your age? \*

*Mark only one oval.*

- 18-24 years old
- 25-34 years old
- 35-44 years old
- 45 years and over
- Prefer not to say

## 3. Please specify your ethnicity \*

*Mark only one oval.*

- White (British, Irish, Any other white background)
- Asian / Asian British
- Black / African / Caribbean / Black British
- Mixed / Multiple ethnic groups
- Other ethnic group
- Prefer not to say

8/18/2021

Appendix 2: Follow-up Questionnaire Post-Interim FY1 post

## 4. Which medical school did you attend? \*

*Mark only one oval.*

- University of Aberdeen
- Anglia Ruskin University
- Aston University
- Barts and The London School of Medicine and Dentistry
- University of Birmingham
- Brighton and Sussex Medical School
- University of Bristol
- University of Buckingham
- University of Cambridge
- Cardiff University
- University of Dundee
- Edge Hill University
- University of Exeter
- University of Glasgow
- Hull York Medical School
- Imperial College London
- Keele University
- Kent and Medway Medical School
- King's College London
- Lancaster University
- University of Leeds
- University of Leicester
- University of Liverpool
- London School of Hygiene and Tropical Medicine
- University of Manchester
- Newcastle University
- Norwich Medical School (University of East Anglia)
- University of Nottingham
- University of Nottingham - Lincoln Medical School

8/18/2021

Appendix 2: Follow-up Questionnaire Post-Interim FY1 post

- University of Oxford
- Plymouth University
- Queen's University Belfast
- University of Sheffield
- University of Southampton
- University of St Andrews
- St George's, University of London
- University of Sunderland
- Swansea University
- University of Central Lancashire
- University College London
- University of Warwick
- Other

5. Which NHS Trust will you be working in from August 2020? \*

---

6. Which specialty will you be working in from August 2020? \*

---

7. I feel confident about starting FY1 in August 2020. \*

*Mark only one oval.*

- Strongly disagree
- Disagree
- Neutral
- Agree
- Strongly agree

8/18/2021

Appendix 2: Follow-up Questionnaire Post-Interim FY1 post

**Common  
FY1 Tasks**

The following section will review your confidence in completing common tasks usually required of an FY1. Please rate your confidence on a scale of 1-5.

1 = Not confident, 2 = Slightly confident, 3= Somewhat confident, 4 = Moderately confident, 5 = Very confident

8. 1. In using IT systems at Brighton and Sussex University Hospitals, e.g. Medway, Bamboo/Panda, ICE, PACS \*

1 = Not confident, 2 = Slightly confident, 3= Somewhat confident, 4 = Moderately confident, 5 = Very confident

*Mark only one oval.*

|                       |                       |                       |                       |                       |
|-----------------------|-----------------------|-----------------------|-----------------------|-----------------------|
| 1                     | 2                     | 3                     | 4                     | 5                     |
| <input type="radio"/> |

9. 2. In writing discharge summaries (TTOs) \*

1 = Not confident, 2 = Slightly confident, 3= Somewhat confident, 4 = Moderately confident, 5 = Very confident

*Mark only one oval.*

|                       |                       |                       |                       |                       |
|-----------------------|-----------------------|-----------------------|-----------------------|-----------------------|
| 1                     | 2                     | 3                     | 4                     | 5                     |
| <input type="radio"/> |

10. 3. In making referrals (such as to other specialties, or for investigations) \*

1 = Not confident, 2 = Slightly confident, 3= Somewhat confident, 4 = Moderately confident, 5 = Very confident

*Mark only one oval.*

|                       |                       |                       |                       |                       |
|-----------------------|-----------------------|-----------------------|-----------------------|-----------------------|
| 1                     | 2                     | 3                     | 4                     | 5                     |
| <input type="radio"/> |

8/18/2021

Appendix 2: Follow-up Questionnaire Post-Interim FY1 post

11. Please explain your answer to question 3. \*

---

---

---

---

---

12. 4. In requesting imaging (including CT scans which require discussion with radiologists) \*

1 = Not confident, 2 = Slightly confident, 3= Somewhat confident, 4 = Moderately confident, 5 = Very confident

Mark only one oval.

|                       |                       |                       |                       |                       |
|-----------------------|-----------------------|-----------------------|-----------------------|-----------------------|
| 1                     | 2                     | 3                     | 4                     | 5                     |
| <input type="radio"/> |

13. 5. In speaking to relatives of patients \*

1 = Not confident, 2 = Slightly confident, 3= Somewhat confident, 4 = Moderately confident, 5 = Very confident

Mark only one oval.

|                       |                       |                       |                       |                       |
|-----------------------|-----------------------|-----------------------|-----------------------|-----------------------|
| 1                     | 2                     | 3                     | 4                     | 5                     |
| <input type="radio"/> |

FY1 Core  
Procedures

The following section will review your confidence in performing the practical skills required to complete FY1 competencies. Please rate your confidence on a scale of 1-5.

1 = Not confident, 2 = Slightly confident, 3= Somewhat confident, 4 = Moderately confident, 5 = Very confident

8/18/2021

Appendix 2: Follow-up Questionnaire Post-Interim FY1 post

## 14. 1. Performing venepuncture \*

1 = Not confident, 2 = Slightly confident, 3= Somewhat confident, 4 = Moderately confident, 5 = Very confident

Mark only one oval.

| 1                     | 2                     | 3                     | 4                     | 5                     |
|-----------------------|-----------------------|-----------------------|-----------------------|-----------------------|
| <input type="radio"/> |

## 15. 2. Performing IV cannulation \*

1 = Not confident, 2 = Slightly confident, 3= Somewhat confident, 4 = Moderately confident, 5 = Very confident

Mark only one oval.

| 1                     | 2                     | 3                     | 4                     | 5                     |
|-----------------------|-----------------------|-----------------------|-----------------------|-----------------------|
| <input type="radio"/> |

## 16. 3. Preparing and administering IV medications and injections \*

1 = Not confident, 2 = Slightly confident, 3= Somewhat confident, 4 = Moderately confident, 5 = Very confident

Mark only one oval.

| 1                     | 2                     | 3                     | 4                     | 5                     |
|-----------------------|-----------------------|-----------------------|-----------------------|-----------------------|
| <input type="radio"/> |

8/18/2021

Appendix 2: Follow-up Questionnaire Post-Interim FY1 post

## 17. 4. Performing an arterial puncture in an adult (an ABG) \*

1 = Not confident, 2 = Slightly confident, 3= Somewhat confident, 4 = Moderately confident, 5 = Very confident

Mark only one oval.

| 1                     | 2                     | 3                     | 4                     | 5                     |
|-----------------------|-----------------------|-----------------------|-----------------------|-----------------------|
| <input type="radio"/> |

## 18. 5. Taking blood cultures from peripheral sites \*

1 = Not confident, 2 = Slightly confident, 3= Somewhat confident, 4 = Moderately confident, 5 = Very confident

Mark only one oval.

| 1                     | 2                     | 3                     | 4                     | 5                     |
|-----------------------|-----------------------|-----------------------|-----------------------|-----------------------|
| <input type="radio"/> |

## 19. 6. Administering an intravenous infusion including the prescription of fluids \*

1 = Not confident, 2 = Slightly confident, 3= Somewhat confident, 4 = Moderately confident, 5 = Very confident

Mark only one oval.

| 1                     | 2                     | 3                     | 4                     | 5                     |
|-----------------------|-----------------------|-----------------------|-----------------------|-----------------------|
| <input type="radio"/> |



8/18/2021

Appendix 2: Follow-up Questionnaire Post-Interim FY1 post

## 20. 7. Prescribing an intravenous infusion of blood and blood products \*

1 = Not confident, 2 = Slightly confident, 3= Somewhat confident, 4 = Moderately confident, 5 = Very confident

Mark only one oval.

| 1                     | 2                     | 3                     | 4                     | 5                     |
|-----------------------|-----------------------|-----------------------|-----------------------|-----------------------|
| <input type="radio"/> |

## 21. 8. Administering an injection of local anaesthetic to skin \*

1 = Not confident, 2 = Slightly confident, 3= Somewhat confident, 4 = Moderately confident, 5 = Very confident

Mark only one oval.

| 1                     | 2                     | 3                     | 4                     | 5                     |
|-----------------------|-----------------------|-----------------------|-----------------------|-----------------------|
| <input type="radio"/> |

## 22. 9. Administering a subcutaneous injection e.g. Insulin or LMW Heparin \*

1 = Not confident, 2 = Slightly confident, 3= Somewhat confident, 4 = Moderately confident, 5 = Very confident

Mark only one oval.

| 1                     | 2                     | 3                     | 4                     | 5                     |
|-----------------------|-----------------------|-----------------------|-----------------------|-----------------------|
| <input type="radio"/> |

8/18/2021

Appendix 2: Follow-up Questionnaire Post-Interim FY1 post

## 23. 10. Administering an intramuscular injection \*

1 = Not confident, 2 = Slightly confident, 3= Somewhat confident, 4 = Moderately confident, 5 = Very confident

Mark only one oval.

| 1                     | 2                     | 3                     | 4                     | 5                     |
|-----------------------|-----------------------|-----------------------|-----------------------|-----------------------|
| <input type="radio"/> |

## 24. 11. Performing and interpreting an ECG \*

1 = Not confident, 2 = Slightly confident, 3= Somewhat confident, 4 = Moderately confident, 5 = Very confident

Mark only one oval.

| 1                     | 2                     | 3                     | 4                     | 5                     |
|-----------------------|-----------------------|-----------------------|-----------------------|-----------------------|
| <input type="radio"/> |

## 25. 12. Performing and interpreting peak flow \*

1 = Not confident, 2 = Slightly confident, 3= Somewhat confident, 4 = Moderately confident, 5 = Very confident

Mark only one oval.

| 1                     | 2                     | 3                     | 4                     | 5                     |
|-----------------------|-----------------------|-----------------------|-----------------------|-----------------------|
| <input type="radio"/> |

8/18/2021

Appendix 2: Follow-up Questionnaire Post-Interim FY1 post

## 26. 13. Urethral catheterisation (male) \*

1 = Not confident, 2 = Slightly confident, 3= Somewhat confident, 4 = Moderately confident, 5 = Very confident

Mark only one oval.

|                       |                       |                       |                       |                       |
|-----------------------|-----------------------|-----------------------|-----------------------|-----------------------|
| 1                     | 2                     | 3                     | 4                     | 5                     |
| <input type="radio"/> |

## 27. 14. Urethral catheterisation (female) \*

1 = Not confident, 2 = Slightly confident, 3= Somewhat confident, 4 = Moderately confident, 5 = Very confident

Mark only one oval.

|                       |                       |                       |                       |                       |
|-----------------------|-----------------------|-----------------------|-----------------------|-----------------------|
| 1                     | 2                     | 3                     | 4                     | 5                     |
| <input type="radio"/> |

## 28. 15. Performing airway care including using simple adjuncts (e.g. Guedal airway or laryngeal masks) \*

1 = Not confident, 2 = Slightly confident, 3= Somewhat confident, 4 = Moderately confident, 5 = Very confident

Mark only one oval.

|                       |                       |                       |                       |                       |
|-----------------------|-----------------------|-----------------------|-----------------------|-----------------------|
| 1                     | 2                     | 3                     | 4                     | 5                     |
| <input type="radio"/> |

FY1 Core  
Competencies

The final section will review your confidence in managing unwell patients as per your requirements to meet the clinical care competencies in the F1 curriculum. Please rate your confidence on a scale of 1-5.

1 = Not confident, 2 = Slightly confident, 3= Somewhat confident, 4 = Moderately confident, 5 = Very confident

8/18/2021

Appendix 2: Follow-up Questionnaire Post-Interim FY1 post

## 29. 1. Recognises, assesses and initiates management of the acutely ill patient \*

1 = Not confident, 2 = Slightly confident, 3 = Somewhat confident, 4 = Moderately confident, 5 = Very confident

Mark only one oval.

| 1                     | 2                     | 3                     | 4                     | 5                     |
|-----------------------|-----------------------|-----------------------|-----------------------|-----------------------|
| <input type="radio"/> |

## 30. 2. Recognises, assesses and manages patients with long term conditions \*

1 = Not confident, 2 = Slightly confident, 3 = Somewhat confident, 4 = Moderately confident, 5 = Very confident

Mark only one oval.

| 1                     | 2                     | 3                     | 4                     | 5                     |
|-----------------------|-----------------------|-----------------------|-----------------------|-----------------------|
| <input type="radio"/> |

## 31. 3. Obtains history, performs clinical examination, formulates differential diagnosis and management plan \*

1 = Not confident, 2 = Slightly confident, 3 = Somewhat confident, 4 = Moderately confident, 5 = Very confident

Mark only one oval.

| 1                     | 2                     | 3                     | 4                     | 5                     |
|-----------------------|-----------------------|-----------------------|-----------------------|-----------------------|
| <input type="radio"/> |

8/18/2021

Appendix 2: Follow-up Questionnaire Post-Interim FY1 post

## 32. 4. Requests relevant investigations and acts upon results \*

1 = Not confident, 2 = Slightly confident, 3= Somewhat confident, 4 = Moderately confident, 5 = Very confident

Mark only one oval.

| 1                     | 2                     | 3                     | 4                     | 5                     |
|-----------------------|-----------------------|-----------------------|-----------------------|-----------------------|
| <input type="radio"/> |

## 33. 5. Prescribes safely \*

1 = Not confident, 2 = Slightly confident, 3= Somewhat confident, 4 = Moderately confident, 5 = Very confident

Mark only one oval.

| 1                     | 2                     | 3                     | 4                     | 5                     |
|-----------------------|-----------------------|-----------------------|-----------------------|-----------------------|
| <input type="radio"/> |

## 34. 6. Performs procedures safely \*

1 = Not confident, 2 = Slightly confident, 3= Somewhat confident, 4 = Moderately confident, 5 = Very confident

Mark only one oval.

| 1                     | 2                     | 3                     | 4                     | 5                     |
|-----------------------|-----------------------|-----------------------|-----------------------|-----------------------|
| <input type="radio"/> |

8/18/2021

Appendix 2: Follow-up Questionnaire Post-Interim FY1 post

## 35. 7. Is trained and manages cardiac and respiratory arrest \*

1 = Not confident, 2 = Slightly confident, 3= Somewhat confident, 4 = Moderately confident, 5 = Very confident

Mark only one oval.

|                       |                       |                       |                       |                       |
|-----------------------|-----------------------|-----------------------|-----------------------|-----------------------|
| 1                     | 2                     | 3                     | 4                     | 5                     |
| <input type="radio"/> |

## 36. 8. Demonstrates understanding of the principles of health promotion and illness prevention \*

1 = Not confident, 2 = Slightly confident, 3= Somewhat confident, 4 = Moderately confident, 5 = Very confident

Mark only one oval.

|                       |                       |                       |                       |                       |
|-----------------------|-----------------------|-----------------------|-----------------------|-----------------------|
| 1                     | 2                     | 3                     | 4                     | 5                     |
| <input type="radio"/> |

## 37. 9. Manages palliative and end of life care \*

1 = Not confident, 2 = Slightly confident, 3= Somewhat confident, 4 = Moderately confident, 5 = Very confident

Mark only one oval.

|                       |                       |                       |                       |                       |
|-----------------------|-----------------------|-----------------------|-----------------------|-----------------------|
| 1                     | 2                     | 3                     | 4                     | 5                     |
| <input type="radio"/> |

## 38. Did you have an Interim FY1 post? \*

Mark only one oval.

- Yes    Skip to question 39
- No    Skip to question 59

8/18/2021

Appendix 2: Follow-up Questionnaire Post-Interim FY1 post

## Interim FY1 post

39. In which NHS Trust did you complete your Interim FY1 post? \*

---

40. In which specialty did you complete your Interim FY1 post? \*

---

41. How many weeks long was your interim FY1 post (to nearest week)? \*

*Mark only one oval.*

1

2

3

4

5

6

7

8

9

42. Did you have an assistantship placement during medical school? \*

A student assistantship is a placement usually in the final year of medical school in which a student is on the same ward and/or team acting as assistant to a junior doctor, with defined duties under appropriate supervision. They should be integrated into the team and participate in activities similar to those of a newly qualified doctor.

*Mark only one oval.*

Yes    *Skip to question 43*

Unsure    *Skip to question 45*

No    *Skip to question 45*

8/18/2021

Appendix 2: Follow-up Questionnaire Post-Interim FY1 post

43. How did the assistantship compare to the Interim FY1 post, in terms of improving your skills, knowledge and confidence for starting FY1? \*

*Mark only one oval.*

- Interim post MORE beneficial than assistantship
- Interim post EQUALLY beneficial to assistantship
- Interim post LESS beneficial than assistantship

44. Please explain your answer.

---

*Skip to question 45*

45. Did you do any on calls as part of your Interim FY1 post? Tick all that apply. \*

*Check all that apply.*

- Weekend day shifts
- Late shifts (all or part of the scheduled shift is after 5pm)
- Night shifts
- I didn't do any on call shifts

46. Did you feel you were part of the multi-disciplinary team (MDT) during your Interim FY1 post? \*

The multi-disciplinary team is a group of professionals from one or more clinical disciplines (e.g. nurses, physiotherapists, occupational therapists, dietitians, speech and language therapists etc.) who work together to make decisions regarding patient management.

*Mark only one oval.*

- Always
- Mostly
- Sometimes
- Rarely
- Never



8/18/2021

Appendix 2: Follow-up Questionnaire Post-Interim FY1 post

47. Do you feel you were treated as a doctor during your Interim FY1 post (as opposed to a student)? \*

*Mark only one oval.*

- Always
- Mostly
- Sometimes
- Rarely
- Never

48. Did you feel that you knew what your role was within the team? \*

*Mark only one oval.*

- Always
- Mostly
- Sometimes
- Rarely
- Never

49. Did you feel as though you were appropriately supervised? \*

*Mark only one oval.*

- Always
- Mostly
- Sometimes
- Rarely
- Never

8/18/2021

Appendix 2: Follow-up Questionnaire Post-Interim FY1 post

50. Did you feel you had clear learning outcomes for the Interim FY1 post? \*

*Mark only one oval.*

- Yes
- Somewhat
- No

51. Do you think your Interim F1 post has been broadly similar to that of your colleagues? \*

*Mark only one oval.*

- Yes
- Somewhat
- No

*Skip to question 52*

52. Do you feel that the Interim FY1 post has improved your competence? \*

*Mark only one oval.*

- Yes
- Somewhat
- No

53. Has the Interim FY1 post reduced your anxiety about starting FY1? \*

*Mark only one oval.*

- Yes
- Somewhat
- No

8/18/2021

Appendix 2: Follow-up Questionnaire Post-Interim FY1 post

54. What was most useful about the Interim FY1 post? \*

---

---

---

---

---

55. Were there any disadvantages to having an Interim FY1 post? \*

---

---

---

---

---

56. Can you suggest anything to improve the Interim FY1 post? \*

---

---

---

---

---

57. Would you recommend the Interim FY1 post for next year? \*

*Mark only one oval.*

Yes

No

8/18/2021

Appendix 2: Follow-up Questionnaire Post-Interim FY1 post

58. Would you have done this Interim FY1 post unpaid as part of the medical school curriculum? \*

Mark only one oval.

- Yes  
 Maybe  
 No

Skip to question 61

59. Do you wish you had completed an Interim FY1 post? \*

Mark only one oval.

- Yes  
 Somewhat  
 No

60. Please explain your answer. \*

---

Skip to question 61

To Finish

61. Please include any further comments you would like to make.

---

---

---

---

---

8/18/2021

Appendix 2: Follow-up Questionnaire Post-Interim FY1 post

62. Please enter your email address if you would like to be included in the prize draw.

---

63. Are you happy to be sent a further follow up questionnaire?

Please ensure you will have access to the email address you entered above in 2 months time.

*Mark only one oval.*

Yes

No

**Thank you very much for your time.**

By clicking 'submit' you are consenting to participating in this improvement project, as described previously. For any more information, please email [cristina.gatti1@nhs.net](mailto:cristina.gatti1@nhs.net) or [kathryn.parker-conway@nhs.net](mailto:kathryn.parker-conway@nhs.net).

---

This content is neither created nor endorsed by Google.

Google Forms
